# Supplementary material for: How equity is addressed in clinical practice guidelines: a content analysis
Source: PubMed Central journal article supplement — BMJ Open. 2014 Dec 5;4(12):e005660. doi: 10.1136/bmjopen-2014-005660 (PMC4265087; doi:10.1136/bmjopen-2014-005660), 2014-12-05
Supplement: bmjopen-2014-005660.draft_revisions.pdf [file bmjopen-2014-005660.draft_revisions.pdf]

# BMJ Open

## How equity is addressed in clinical practice guidelines: a content analysis

|                                 |                                                                                                                                                                                                                                                                                                                                                                                                                                                                                                                                                                                                                                                                                                                                                                                                                                                                 |
|---------------------------------|-----------------------------------------------------------------------------------------------------------------------------------------------------------------------------------------------------------------------------------------------------------------------------------------------------------------------------------------------------------------------------------------------------------------------------------------------------------------------------------------------------------------------------------------------------------------------------------------------------------------------------------------------------------------------------------------------------------------------------------------------------------------------------------------------------------------------------------------------------------------|
| Journal:                        | <i>BMJ Open</i>                                                                                                                                                                                                                                                                                                                                                                                                                                                                                                                                                                                                                                                                                                                                                                                                                                                 |
| Manuscript ID:                  | bmjopen-2014-005660                                                                                                                                                                                                                                                                                                                                                                                                                                                                                                                                                                                                                                                                                                                                                                                                                                             |
| Article Type:                   | Research                                                                                                                                                                                                                                                                                                                                                                                                                                                                                                                                                                                                                                                                                                                                                                                                                                                        |
| Date Submitted by the Author:   | 08-May-2014                                                                                                                                                                                                                                                                                                                                                                                                                                                                                                                                                                                                                                                                                                                                                                                                                                                     |
| Complete List of Authors:       | SHI, Chunhu; Evidence Based Medicine Centre of Lanzhou University; Key Laboratory of Evidence Based Medicine and Knowledge Translation of Gansu Province,<br>Tian, Jinhui; Evidence Based Medicine Centre of Lanzhou University; Key Laboratory of Evidence Based Medicine and Knowledge Translation of Gansu Province,<br>WANG, Quan; Evidence Based Medicine Centre of Lanzhou University; Key Laboratory of Evidence Based Medicine and Knowledge Translation of Gansu Province,<br>REN, Dan; Department of Nursing, School of Basic Medical Sciences; Evidence Based Medicine Centre of Lanzhou University,<br>O'Neill, Jennifer; Institute of Population Health, University of Ottawa, Canada,<br>Yang, Kehu; Evidence Based Medicine Centre of Lanzhou University; Key Laboratory of Evidence Based Medicine and Knowledge Translation of Gansu Province, |
| <b>Primary Subject Heading</b>: | Evidence based practice                                                                                                                                                                                                                                                                                                                                                                                                                                                                                                                                                                                                                                                                                                                                                                                                                                         |
| Secondary Subject Heading:      | Public health                                                                                                                                                                                                                                                                                                                                                                                                                                                                                                                                                                                                                                                                                                                                                                                                                                                   |
| Keywords:                       | Protocols & guidelines < HEALTH SERVICES ADMINISTRATION & MANAGEMENT, QUALITATIVE RESEARCH, PUBLIC HEALTH                                                                                                                                                                                                                                                                                                                                                                                                                                                                                                                                                                                                                                                                                                                                                       |
|                                 |                                                                                                                                                                                                                                                                                                                                                                                                                                                                                                                                                                                                                                                                                                                                                                                                                                                                 |

SCHOLARONE™  
Manuscripts

## How equity is addressed in clinical practice guidelines: a content analysis

Chunhu SHI<sup>1,2</sup>, Jinhui TIAN<sup>1,2</sup>, Quan WANG<sup>1,2,3</sup>, Dan REN<sup>2,4</sup>, Jennifer O'Neill<sup>5</sup>, Kehu YANG<sup>1,2</sup>

1. Evidence-Based Medicine Center, School of Basic Medical Sciences, Lanzhou University;
2. Key Laboratory of Evidence Based Medicine and Knowledge Translation of Gansu Province;
3. The First Clinical Medicine School, Lanzhou University;
4. School of Basic Medical Sciences, Lanzhou University;
5. Institute of Population Health, University of Ottawa, Canada.

### Corresponding Author

Kehu YANG, Evidence Based Medicine Centre of Lanzhou University; Key Laboratory of Evidence Based Medicine and Knowledge Translation of Gansu Province. 199 Donggang West Road, Lanzhou, Gansu, China, 730000

E-mail: kehuyangebm2006@126.com

### Email addresses of all authors

Chunhu SHI: shihchoonhrou@gmail.com;

Jinhui TIAN: tianjh@lzu.edu.cn;

Quan WANG: 371438006@qq.com;

Dan REN: 1290250592@qq.com;

Jennifer O'Neill: jennifer.oneill@uottawa.ca;

Kehu YANG: kehuyangebm2006@126.com

### Author Contributions

- 1) Conceiving and designing this review: Chunhu SHI, Jinhui TIAN and Kehu YANG,
- 2) Searching, extracting data and analyzing the data: Chunhu SHI, Quan WANG and Kehu YANG,
- 3) Writing and amending manuscript: Chunhu SHI, Jinhui TIAN, Dan REN and Jennifer O'Neill
- 4) When disagreements happened, discussing with Kehu YANG and Jinhui TIAN.
- 5) Final approval of manuscript: Chunhu SHI, Jinhui TIAN, Quan WANG, Dan REN, Jennifer O'Neill and Kehu YANG.
- 6) Important comments and english editing: Jennifer O'Neill

**Keywords:** health equity, clinical practice guidelines, content analysis

**Word count:** 2743 (excluding title page, abstract, references, figures and tables).

## Abstract

### Background

Clinical practice guidelines (CPGs) assist practitioner and patient decisions for specific clinical circumstances. The number of CPGs has increased dramatically and has focused on the effectiveness and cost-effectiveness of interventions to balance benefits versus harms and cost. However, equity rarely is addressed in CPGs. Incorporating equity into guidelines presents methodological challenges.

### Objectives

To review the methods for incorporating equity in CPGs.

### Design

We electronically searched Medline, retrieved references and browsed guideline development organization websites to identify eligible papers which provide a checklist/framework/tools/recommendations on when, how and to what extent equity should be incorporated in CPGs. No assessment of quality was conducted. After study selection by two authors, general characteristics and checklist items/framework components from included studies were extracted. Based on the questions or items from checklists/frameworks (unit of analysis), content analysis was conducted to identify themes and questions/items were grouped into these themes.

### Results

10 papers were included from 3405 citations. In total, a list of 87 questions/items was generated from 17 checklists/frameworks. After content analysis, questions were grouped into 8 themes: 'scope', 'searching', 'formulate recommendations', 'appraisal', 'monitor implementation', 'assess the quality of CPGs', 'reporting' and 'the process to develop CPGs'. Four included checklists covered more than five of these themes. We also summarized the process of guideline development.

### Conclusion

For targeted population specific CPGs, 'scope', 'searching', 'formulate recommendations', 'appraisal', 'monitor implementation', 'assess the quality of CPGs', 'reporting' and 'the process to develop CPGs' should be addressed when including equity in CPGs under the guidance of a scientific guideline development manual.

### Strengths and limitations of this study

- Methodological challenges are the barriers of incorporating equity into guidelines. For this topic, this study synthesizes some themes (e.g. 'scope', 'formulate recommendations', 'searching', 'appraisal', 'monitor implementation', 'assess the quality of CPGs', and 'reporting') and a developing process through a content analysis of eight papers.
- These findings allow the guideline panel to consider equity issues into guidelines and contribute methodologists to develop a methodological document in future.
- These findings provide some valuable guidance, however no statement on methodological issues in equity or new checklist is built.

### Background

Health is defined by the World Health Organization (WHO) as "a state of complete physical, mental and social well-being and not merely the absence of disease or infirmity"<sup>[1]</sup>. However,

1  
2  
3 health interventions may create differences in health outcomes across socioeconomic,  
4 demographic and geographic factors, described as health inequalities. When these differences are  
5 avoidable, unnecessary and unjust they are described as health inequities <sup>[2,3]</sup>. The WHO  
6 recognizes that reducing inequities in health is important since health is a fundamental human  
7 right <sup>[4]</sup>. Inequities in health and health care are well documented in relationship to social and  
8 economic factors, including Place of residence (e.g. rural, urban, inner city,  
9 Race/ethnicity/culture/language, Occupation, Gender/sex, Religion, Educational, Socioeconomic  
10 status and Social capital (e.g. availability of neighborhood support, social stigma, civic society)  
11 (PROGRESS) <sup>[5]</sup>. Equity issues have been shown to have negative effects on health status <sup>[6,7]</sup>. For  
12 example, as Wallace et al. <sup>[8]</sup> reported, the HIV epidemic's structure in the US was influenced by  
13 two such determinants, the link between geographic regions and the socioeconomic structure,  
14 function, and history of the regions. Another example is that low birth weight can be predicted by  
15 socioeconomic status, especially poverty. <sup>[9]</sup> From the Global Burden of Disease (GBD) Study in  
16 2010, age-specific, sex-specific and regional heterogeneity were severely highlighted in  
17 disability-adjusted life years (DALYs), causes of death, and mortality <sup>[10-12]</sup>.

18 Clinical practice guidelines, as defined by the Institute of Medicine, are 'systematically developed  
19 statements to assist practitioner and patient decisions about appropriate health care for specific  
20 clinical circumstances.' <sup>[13]</sup> They are an increasingly familiar part of clinical practice and may  
21 provide concise guidance on which assessment programs to order, how to provide medical or  
22 surgical interventions, or other details of clinical practice <sup>[14]</sup>. Guideline development is becoming  
23 more evidence-based <sup>[15]</sup>.

24  
25  
26  
27  
28  
29  
30  
31  
32  
33  
34  
35  
36  
37  
38  
39  
40  
41  
42  
43  
44  
45  
46  
47  
48  
49  
50  
51  
52  
53  
54  
55  
56  
57  
58  
59  
60  
Regardless of the setting, there is potential for the CPG to introduce inequities. Differences in  
health outcomes across population groups are possible if equity is not considered in guideline  
development and CPGs and their recommendations may create or increase health inequities <sup>[16]</sup>.  
The inclusion of equity considerations in CPG development and implementation has become  
increasingly important <sup>[17,18]</sup>. However, incorporating equity into guidelines remains a challenge;  
the main barriers are methodological and conceptual limitations <sup>[17,19]</sup>. In this paper we aimed to  
review methods for including equity considerations in CPGs.

### **Present investigation**

#### **Eligibility criteria**

We conducted this review to investigate methodological guidance for including equity in CPGs.  
Only methodological guidance, guidelines, and articles that described when, how and to what  
extent equity issues could be incorporated in CPGs were included in this review.

#### **Information sources and search**

Relevant studies were obtained from the following sources.

- 1) MEDLINE (1966 to Jan 2013) was electronically searched using an adapted version of the  
search strategy developed by Haase A et al. (2007) for the identification of clinical practice  
guidelines <sup>[20]</sup>: (recommendation[All Fields] OR "consensus"[MeSH Terms] OR  
"consensus"[All Fields] OR "guideline"[Publication Type] OR "guidelines as topic"[MeSH  
Terms] OR "guideline"[All Fields]) AND (equal\* OR equal[All Fields] OR "Civil  
Rights"[Mesh] OR equity[All Fields] OR equit\*) limited in "Humans and Title/Abstract";
- 2) Relevant studies were retrieved from reference lists of eligible articles;
- 3) In Jan 2013, we browsed guidelines development organizations' websites including: National  
Institute for Health and Clinical Excellence (NICE), New Zealand Guidelines Group, Scottish

1  
2  
3 Intercollegiate Guidelines Network, Guideline International Network (G-I-N), CMA Infobase:  
4 Clinical Practice Guidelines, PUBGLE, Trip Database, and National Guideline Clearinghouse,  
5 etc.;

- 6  
7 4) Online publications from the 'International Journal for Equity in Health' (from 2002 to Jan  
8 2013) was hand-searched;  
9  
10 5) We also emailed SIGN, the New Zealand Guidelines Group and National Guideline  
11 Clearinghouse, etc. to access specific documents.

### 12 **Study selection and data collection process**

13 Authors CHS and QW independently screened titles and abstracts. The full text (if published) of  
14 all potentially relevant studies were retrieved and independently assessed for inclusion by QW and  
15 KHY. CHS and KHY carried out data extraction independently using a standard data extraction  
16 form (Appendix 1: Data extraction form). We planned to translate papers reported in non-English  
17 language journals (if any) before assessment. Where more than one publication on the same  
18 guidance existed, only the publication with the most complete data was included. Any further  
19 information or clarification required from the authors was requested by written or electronic  
20 correspondence and relevant data obtained in this manner were included in the review.  
21 Disagreements were resolved in consultation among the authors.  
22  
23

### 24 **Data items**

25 In this review, data items are the questions or items from all available instruments, checklists,  
26 critical appraisal tools and indices which were designed to guide the incorporation of equity issues  
27 into CPGs or assessing the quality of CPGs within equity issues. No data on participants (P),  
28 interventions (I), comparators (C), clinical outcomes (O) and study designs (S) was extracted.  
29  
30

### 31 **Synthesis of results**

32 In this review, written documents and phrases were the unit of analysis so that no quantitative data  
33 were analyzed by specific software. Using content analysis, authors CHS and JHT synthesized  
34 methodological themes and processes on how to address equity issues in guideline development.  
35 Content analysis is 'a research technique for making replicable and valid inferences from data to  
36 their context.'<sup>[21]</sup>, which 'emphasizes the quantification of the 'what' that messages communicate,  
37 the 'who' (the source), the 'why' (the encoding process) and the consequences of 'effects' they  
38 have 'on whom'<sup>[21]</sup>, by which themes can be summarized from meaningful qualitative data. A  
39 simplified process was used in this review: identifying units of analysis (the items/questions),  
40 excluding irrelevant information and abstracting the phrase or words from each unit of analysis,  
41 labeling these concepts, grouping and creating themes to link the underlying concepts together in  
42 categories. (Appendix 2: The process of content analysis) No additional analysis was used in this  
43 review.  
44  
45  
46

### 47 **Results**

#### 48 **Guidance selection**

49 We retrieved 3370 citations from MEDLINE. After reviewing titles and abstracts, 3353 were  
50 excluded. 23 additional citations were identified from the combined search of guideline  
51 development organization websites, the International Journal for Equity in Health and emailing  
52 guideline development organizations. After reviewing titles and abstracts, 17 papers were  
53 excluded. The full text-versions of 23 papers were obtained in total. After screening their reference  
54 lists, an additional 12 citations met our eligibility criteria. In total, 35 potentially relevant full texts  
55 were screened, out of which 25 full-texts were excluded. The major reason for exclusion was that  
56  
57  
58  
59  
60

1  
2  
3 the papers did not focus on methods for addressing equity in CPGs. Finally, 8 papers (from 10  
4 documents) <sup>[16-18,22-28]</sup> were included in this review (Figure 1: Selection process of included  
5 studies).  
6

### 7 **Study characteristics**

8 The characteristics of the included studies are reported in the table of characteristics of included  
9 studies (Table 1).  
10  
11  
12  
13  
14  
15  
16  
17  
18  
19  
20  
21  
22  
23  
24  
25  
26  
27  
28  
29  
30  
31  
32  
33  
34  
35  
36  
37  
38  
39  
40  
41  
42  
43  
44  
45  
46  
47  
48  
49  
50  
51  
52  
53  
54  
55  
56  
57  
58  
59  
60

Table 1 Characteristics of the included papers

| Ref       | Study                          | Journal/Sources                          | Publication type       | Definition of equity                       | Scope                 | Targeted users     | Funding                                                                         |
|-----------|--------------------------------|------------------------------------------|------------------------|--------------------------------------------|-----------------------|--------------------|---------------------------------------------------------------------------------|
| 16        | Eslava-Schmalbach J 2011       | Rev. salud publica                       | Review                 | Casas-Zamora JA 2004,<br>Whitehead M. 1992 | Why,<br>How           | unclear            | No declaration                                                                  |
| 18        | Dans AM 2007                   | Journal of Clinical<br>Epidemiology      | Article                | Braveman 2003,<br>Whitehead 1992           | Assessment            | CPGs users         | Rockefeller Foundation,<br>Norwegian Health Services<br>Research Center<br>WHO, |
| 22        | Oxman AD 2006                  | Health Research<br>Policy and<br>Systems | Review                 | Braveman 2003,<br>Whitehead 1992           | When,<br>What,<br>How | CPGs<br>developers | Norwegian Knowledge<br>Centre for the Health<br>Services                        |
| 23        | Acosta N 2011                  | Rev. salud publica                       | Review                 | None provided                              | How                   | CPGs<br>developers | No declaration                                                                  |
| 24,<br>25 | NICE 2012 &<br>NICE 2012       | NICE                                     | Guideline              | None provided                              | How                   | CPGs<br>developers | No declaration                                                                  |
| 17,<br>26 | Aldrich R 2003 &<br>NHMRC 2002 | BMJ &<br>NHMRC                           | Article &<br>Guideline | None provided                              | How                   | CPGs<br>developers | No declaration                                                                  |
| 27        | Keuken DG 2008                 | Dissertation                             | Dissertation           | None provided                              | How                   | unclear            | Netherlands Organization<br>for Health Research and<br>Development              |
| 28        | WHO 2012                       | WHO                                      | Guideline              | None provided                              | How                   | CPGs<br>developers | No declaration                                                                  |

1  
2  
3 We included four guidelines or handbooks published by National Institute for Health and Clinical  
4 Excellence (NICE), the National Health and Medical Research Council (Australia, NHMRC) and  
5 WHO [24-26,28]. Six guiding reviews or original articles [16-18,22,23,27] were identified from Medline.  
6 Three reports [16,18,22] defined equity issues according to definitions from Braveman (2003) [29],  
7 Whitehead (1992) [2] or Casas-Zamora JA (2004) [30]. Others did not provide a definition. For the  
8 scope of included studies, Eslava-Schmalbach J (2011) [16] focused on why equity issues should be  
9 addressed in CPGs; Oxman AD (2006) [22] focused on when to address them and what content  
10 should be addressed; Dans AM (2007) [18] focused on how to assess the quality of CPGs including  
11 equity; and seven studies [16,17,22-28] focused on how to address equity in CPGs. For targeted users,  
12 Dans AM 2007 [18] provided guidance to CPG users; five studies [17,22-26,28] aimed to provide  
13 guidance to CPG developers; and Keuken DG (2008) [27] and Eslava-Schmalbach J (2011) [16] did  
14 not provide any details. Five studies [16,17,23-26,28] did not provide details of financial support.  
15 Keuken DG (2007) [27] provided recommendations only related to sex-related factors in guideline  
16 development. NICE (2012) [24,25] provided population characteristics on equity issues, equality in  
17 guideline development, a checklist for scoping, a checklist for early guideline development and a  
18 checklist for formulating recommendations. Dans AM (2007) [18] provided an equity lens to assess  
19 the quality of guidelines within equity issues. Focusing on the WHO guidelines, Oxman AD (2006)  
20 [22] reviewed related articles to provide guidance to address equity in guidelines.  
21 Eslava-Schmalbach J (2011) [16] described why equity issues should be addressed in guidelines.  
22 Acosta N (2011) [23] provided simple guidance for including equity in guidelines; NHMRC (2002)  
23 [26] and Aldrich (2003) [17] provided indicators and search terms for socioeconomic position and a  
24 framework for using evidence on socioeconomic position in the development of clinical practice  
25 guidelines. Rather than focusing on equity issues in particular, the WHO (2012) [28] provided  
26 advice on equity issues in 'PICO question components' and 'evidence retrieval and synthesis'  
27 sections.

### 28 **Synthesis of results**

29 In total, 87 questions/items were collected. After content analysis, 8 themes were identified:  
30 'scope', 'formulate recommendations', 'searching', 'appraisal', 'monitor implementation', 'assess  
31 the quality of CPGs', 'reporting' and 'the process to develop CPGs'. (see Table 2: Summary of  
32 finding; Figure 2: The process of including equity in CPGs; Appendix 3: Content analysis of  
33 individual studies)



Table 2 Summary of findings

| Studies                                                     | Themes |           |                           |           |                        |                            |                             |           |
|-------------------------------------------------------------|--------|-----------|---------------------------|-----------|------------------------|----------------------------|-----------------------------|-----------|
|                                                             | Scope  | Searching | Formulate recommendations | Appraisal | Monitor implementation | Assess the quality of CPGs | The process to develop CPGs | Reporting |
| Eslava-Schmalbach J 2011 <sup>[16]</sup>                    | √      |           |                           |           |                        |                            | √                           |           |
| Dans AM 2007 <sup>[18]</sup>                                | √      |           | √                         | √         | √                      | √                          |                             |           |
| Oxman AD2006 <sup>[22]</sup>                                | √      |           |                           | √         | √                      |                            |                             |           |
| Acosta N 2011 <sup>[23]</sup>                               | √      |           |                           | √         | √                      |                            |                             |           |
| NICE 2012 <sup>[24]</sup> & NICE 2012 <sup>[25]</sup>       | √      | √         | √                         | √         |                        |                            | √                           |           |
| Aldrich R 2003 <sup>[17]</sup> & NHMRC 2003 <sup>[26]</sup> | √      | √         | √                         | √         | √                      |                            | √                           |           |
| Keuken DG 2007 <sup>[27]</sup>                              | √      | √         | √                         | √         | √                      |                            | √                           | √         |
| WHO 2012 <sup>[28]</sup>                                    | √      | √         |                           |           |                        |                            |                             |           |

**Scope**

All 8 papers <sup>[16-18,22-28]</sup> reported the 'scope' of their paper. These included why it is necessary to address equity (the differential effectiveness across groups, negative impact of guideline without equity considerations and improving overall effectiveness of guideline within equity) <sup>[16]</sup>, the presence of differential effects across groups (when to address equity) <sup>[22]</sup>, targeted population, PROGRESS framework (what are social determinants of health) <sup>[5]</sup>, and the changes and comments for scope <sup>[24,25]</sup>.

**Searching**

Four of the included papers <sup>[17,24-28]</sup> described the 'searching' theme, including searching relevant study designs, changing search strategies, the usage of terms/markers for equity, the appraisal of eligibility criteria for 'searching' and providing an equitable search strategy.

**Formulate recommendations**

Four papers <sup>[17,18,24-27]</sup> reported how to formulate recommendations or what should be considered when formulating recommendations, including the balance between harms and benefits, formulating equitable recommendations (such as considering barriers and facilitators of interventions, and mitigating negative effects that may produce inequities during the formulation of recommendations), how to advance recommendations and adjust recommendations.

**Appraisal**

Six papers <sup>[17,18,22-27]</sup> fulfilled the 'appraisal' theme, including the appraisal of scientific evidence, such as the appraisal of appropriate modifiers, study design, sample size, analysis methods, the applicability and relevance of evidence, influence of equity evidences, the quality of evidence, the necessity of evidence and making changes and evidence gaps, as well as the appraisal of recommendations, such as the relevance of recommendations, the impact of recommendations and the quality of development process.

**Monitor implementation**

Five papers <sup>[17,18,22,23,26,27]</sup> described the 'monitor implementation' theme, including what should be considered during implementation and how to monitor implementation including: minimizing barriers to implementation, informing adaptation and decision making in some specific settings, developing an equitable implementation strategy, changing the organizational structure, and monitor the effects of implementation. When no evidence was found, changing search strategies, scope and promotion strategies were reported.

**Assess the quality of CPGs**

Dans AM (2007) <sup>[18]</sup> reported how to 'assess the quality of CPGs', including whether recommendations considered priorities for disadvantaged populations and factors to explore differential effects across groups during the scoping stage. The authors suggest assessing whether there are differential effects from the intervention across groups and considering these when formulating recommendations as well as addressing barriers to implementation and the impact of the recommendations.

**Others**

Keuken DG (2007) <sup>[27]</sup> reported the knowledge needs for the various ways of reporting guidelines. The authors stated that CPGs should highlight gender, and CPG developers should balance advantages and disadvantages of different reporting methods. Eslava-Schmalbach J (2011) <sup>[16]</sup> focused on why equity issues should be considered during the scoping stage. NICE (2012) <sup>[24,25]</sup> highlighted the need for engagement with stakeholders during every stage of the development

process.

### **The process of including equity in CPGs**

Four papers <sup>[16,17,24-27]</sup> reported on 'the process of developing CPGs', and included the following common steps: identifying questions, development of search strategies, appraisal of scientific evidence, synthesizing the evidence, formulation of recommendations and writing the guideline documents. These results and our findings mentioned above, indicate that CPG development requires an integrated process, including the following themes: 'scope', 'search', 'appraising scientific evidence', 'synthesizing the evidence', 'formulating recommendations', 'appraising recommendations', 'monitoring implementation', 'assessing the quality of CPGs', and 'appropriate reporting the documents' stages. (Figure 2: The process of including equity in CPGs)

## **Discussion**

### **Summary of evidence**

We identified eight papers focusing on how to address equity issues in guidelines. Eight themes were identified, which included 'scope', 'formulate recommendations', 'searching', 'appraisal', 'monitor implementation', 'assess the quality of CPGs', 'the process to develop CPGs' and 'reporting'. From these included checklists/frameworks, we found a few open questions which provided suggestions rather than items with appraisal functions and recommended frameworks. Few guidance documents described how to assess the quality of CPGs which considered equity issues in their recommendations, the process to develop CPGs, or how to report a guideline with equity considerations. Dans AM (2007) <sup>[18]</sup>, NHMRC (2003) <sup>[26]</sup>, Keuken DG (2007) <sup>[27]</sup>, Aldrich R (2003) <sup>[17]</sup> and NICE (2012) <sup>[24,25]</sup> covered more than five themes. We summarized a process to develop guidelines which consider equity issues according to our findings and previously described frameworks.

All included papers reported the 'scope' theme. When a guideline is developed, a description of why equity should be considered needs to be based on the differential effectiveness of interventions between subgroups. The PROGRESS framework is recommended for identifying potentially disadvantaged groups when describing the scope of the CPG <sup>[5]</sup>. Four papers <sup>[17,24-28]</sup> described the 'searching' theme, but, only NICE (2012) <sup>[24,25]</sup> suggested the consideration of study design; and NHMRC (2003) <sup>[26]</sup> & Aldrich R (2003) <sup>[17]</sup> provided search terms on equity issues. Identifying evidence including systematic reviews, clinical practice guidelines, randomized controlled trials and supplementary literature is essential for guideline development. The search strategy must be transparent and reproducible. The reporting of databases, time periods, key words, subject headings, language restrictions, gray literature, and eligibility criteria should be considered <sup>[31]</sup>.

Before formulating recommendations, the quality of scientific evidence must be appraised by respective appraisal tools to variable evidence classifications. The relevance, applicability, impacts of evidence on equity needs and evidence gaps should be assessed. For quality of guidelines, the guideline panel should use the Appraisal of Guidelines Research & Evaluation (AGREE) instrument (which includes the following domains: explicit scope and purpose, stakeholder involvement, rigor of development, clarity of presentation, applicability, and editorial independence <sup>[32]</sup>) to check whether equity issues have been considered appropriately. When evidence gaps exist, expert opinion or consensus is necessary to allow guideline developers to highlight future research needs <sup>[31]</sup>. NHMRC (2003) <sup>[26]</sup> & Aldrich R (2003) <sup>[17]</sup> provide strategies that can be used if no evidence is available, including changing the search strategy. For specific

1  
2  
3 subgroup populations, guideline developers should counterpoise harms and benefits of  
4 interventions, consider barriers and facilitators of interventions, and adjust recommendations for  
5 specific settings. Furthermore, comments from relevant stakeholders and adaption are necessary.  
6 Only Dans AM (2007) provided an equity lens to appraise the quality of guideline with equity  
7 considerations. For the development of a guideline, we suggest that a well-designed handbook  
8 such as the 'WHO handbook for guideline development' [28], 'SIGN 50 A guideline developer's  
9 handbook' [33], 'Handbook on Clinical Practice Guidelines' [34] or NICE 'the guidelines manual  
10 2012' [24] is utilized. The process of guideline development outlined in this paper will be more  
11 effective when used in combination with the handbooks mentioned above.  
12

### 13 **Limitations**

14  
15 With the comprehensive search strategy, only 8 papers (containing 87 questions or items) were  
16 included in this review. However, compared to previous reviews [23], our study includes a wider  
17 collection of handbooks and guidance documents. Although Acosta N (2011) included 20 studies  
18 (of which only three [18,22,26] were included in our review), [23] the authors only discussed equity in  
19 the development of clinical practice guidelines with a narrative literature review. We have  
20 extracted the methodological checklists/frameworks from the eligible studies. Content analysis  
21 was used because of its methodological characteristics and reliable measures to achieve  
22 trustworthiness [35]. However, a limitation of content analysis itself is that the likelihood of  
23 replicability for the analysis procedure is low [21].  
24

### 25 **Conclusions**

26  
27 By reviewing the existing guidance documents and guidelines, eight themes, 'scope', 'formulate  
28 recommendations', 'searching', 'appraisal', 'monitor implementation', 'assess the quality of  
29 CPGs', 'the process to develop CPGs' and 'reporting' were identified for guiding the  
30 incorporation of equity issues into clinical practice guidelines. Among existing checklists, Keuken  
31 DG (2007) [27] and NHMRC (2003) [26] covered most of these themes and have the greatest  
32 potential to be used as a tool for guiding equity considerations in guidelines. No grading systems  
33 or scoring criteria were found from existing checklists.  
34  
35

36  
37  
38 **Contributors** All authors contributed to the manuscript. CHS, JHT and KHY conceived and  
39 designed this review; CHS, QW and KHY searched extracted data and analyzed the data; CHS,  
40 JHT, DR and JO wrote and amended manuscript; we discussed with KHY and JHT when  
41 disagreements happened; JO did important comments and English editing.  
42

43 **Funding** No financial support.

44 **Conflict of interest:** None.

45 **Ethics approval** The study received full ethical approval from the local research ethics  
46 committee.  
47

48 **Data sharing statement** No additional data available.

49 This abstract was accepted as an oral presentation in 21<sup>st</sup> Cochrane Colloquium in Canada on  
50 Monday, 23 September 2013.  
51

### 52 **References**

- 53 1. World Health Organization. (1947) The constitution of the World Health Organization, in  
54 World Health Organization Chronicles.
- 55 2. Whitehead M. (1992) The concepts and principles of equity in health. *Int J Health Serv*  
56  
57  
58  
59  
60

- 22:429-445.
3. Ministry of Health, Reducing Inequalities in Health. 2002, Ministry of Health: Wellington.
  4. World Health Organization. Health Systems: Equity. Available from: <http://www.who.int/healthsystems/topics/equity/en>. Accessed 25 September 2013.
  5. O'Neill J, Tabish H, Welch V, et al. (2014) Applying an equity lens to interventions: using PROGRESS ensures consideration of socially stratifying factors to illuminate inequities in health. *J Clin Epidemiol.* 67(1):56-64.
  6. Long JA, Chang VW, Ibrahim SA, Asch DA. (2004) Update on the health disparities literature. *Ann Intern Med.* 141(10):805-812.
  7. Vogel TR. (2012) Update and review of racial disparities in sepsis. *Surg Infect (Larchmt).* 13(4):203-208.
  8. Wallace R, Huang Y, Gould P, Wallace D. (1997) The hierarchical diffusion of AIDS and violent crime among US metropolitan regions: innercity decay, stochastic resonance and reversal of the mortality transition. *Soc Sci Med* 44:935-947.
  9. Wallace R, Wallace D. (1997) Socioeconomic determinants of health: community marginalisation and the diffusion of disease and disorder in the United States. *BMJ.* 314(7090):1341-1345.
  10. Murray CJ, Vos T, Lozano R, et al. (2012) Disability-adjusted life years (DALYs) for 291 diseases and injuries in 21 regions, 1990-2010: a systematic analysis for the Global Burden of Disease Study 2010. *Lancet.* 380(9859):2197-2223.
  11. Lozano R, Naghavi M, Foreman K, et al. (2012) Global and regional mortality from 235 causes of death for 20 age groups in 1990 and 2010: a systematic analysis for the Global Burden of Disease Study 2010. *Lancet.* 380(9859):2095-2128.
  12. Wang H, Dwyer-Lindgren L, Lofgren KT, et al. (2012) Age-specific and sex-specific mortality in 187 countries, 1970-2010: a systematic analysis for the Global Burden of Disease Study 2010. *Lancet.* 380(9859):2071-2094.
  13. Field MJ, Lohr KN, eds. (1990) Clinical practice guidelines: directions for a new program. Washington, DC: National Academy Press.
  14. Woolf SH, Grol R, Hutchinson A, Eccles M, Grimshaw J. (1999) Potential benefits, limitations, and harms of clinical guidelines. *BMJ.* 318:527.
  15. Shekelle PG, Woolf SH, Eccles M, Grimshaw J. (1999) Clinical guidelines: developing guidelines. *BMJ.* 318(7183):593-596.
  16. Eslava-Schmalbach J, Sandoval-Vargas G, Mosquera P. (2011) Incorporating equity into developing and implementing for evidence-based clinical practice guidelines. *Rev Salud Publica (Bogota).* 13(2):339-351.
  17. Aldrich R, Kemp L, Williams JS, Harris E, Simpson S, Wilson A, McGillK, Byles J, Lowe J, Jackson T. (2003) Using socioeconomic evidence in clinical practice guidelines. *BMJ* 327(7426):1283-1285.
  18. Dans AM, Dans L, Oxman AD, Robinson V, Acuin J, Tugwell P, Dennis R, Kang D. (2007) Assessing equity in clinical practice guidelines. *J Clin Epidemiol.* 60(6):540-546.
  19. Burgers JS, Grol R, Klazinga NS, Makela M, Zaat J. (2003) Towards evidence-based clinical practice: An international survey of 18 clinical guideline programs. *Int J Quality Healthcare* 15:31.
  20. Haase A, Follmann M, Skipka G, Kirchner H. (2007) Developing search strategies for clinical

- 1  
2  
3 practice guidelines in SUMSearch and Google Scholar and assessing their retrieval  
4 performance. *BMC Med Res Methodol.* 7:28.  
5  
6 21. Krippendorff, K. *Content Analysis. (1980) An Introduction to its Methodology.* The Sage  
7 Commtext Series, Sage Publications Ltd., London.  
8  
9 22. Oxman AD, Schünemann HJ, Fretheim A. (2006) Improving the use of research evidence in  
10 guideline development: 12. Incorporating considerations of equity. *Health Res Policy Syst.*  
11 4:24.  
12  
13 23. Acosta N, Pollard J, Mosquera P, Reveiz L. (2011) [The concept of equity when developing  
14 clinical practice guidelines]. [Article in Spanish] *Rev Salud Publica (Bogota).* 13(2):327-338.  
15  
16 24. The National Institute for Health and Clinical Excellence. *The guidelines manual 2012.*  
17 Available from <http://publications.nice.org.uk/the-guidelines-manual-pmg6> Accessed. 29 Oct.  
18 2013.  
19  
20 25. National Institute for Health and Clinical Excellence (November 2012) *Positively equal: A*  
21 *guide to addressing equality issues in developing NICE clinical guidelines (Second edition).*  
22 London: National Institute for Health and Clinical Excellence. Available from:  
23 [www.nice.org.uk](http://www.nice.org.uk)  
24  
25 26. National Health and Medical Research Council. *Using socioeconomic evidence in clinical*  
26 *practice guidelines.* Canberra: NHMRC, 2003:95.  
27 [www.nhmrc.gov.au/publications/synopses/cp65syn.htm](http://www.nhmrc.gov.au/publications/synopses/cp65syn.htm) Accessed 20 Jan 2013.  
28  
29 27. Keuken DG, Haafkens JA, Moerman CJ, Klazinga NS, ter Riet G. (2007) Attention to  
30 sex-related factors in the development of clinical practice guidelines. *J Womens Health*  
31 *(Larchmt).* 16(1):82-92.  
32  
33 28. World Health Organization. (2012) *WHO handbook for guideline development.* WHO Press,  
34 Geneva, Switzerland. Available from: [www.who.int](http://www.who.int)  
35  
36 29. Braveman PA, Gruskin S. (2003) Defining equity in health. *J Epidemiol Community Health*  
37 57:254e8.  
38  
39 30. Casas-Zamora JA, Ibrahim SA. (2004) Confronting health inequity: the global dimension.  
40 *Am J Public Health.* 94(12):2055-2058.  
41  
42 31. Rosenfeld RM, Shiffman RN, Robertson P. (2013) *Clinical Practice Guideline Development*  
43 *Manual, Third Edition: a quality-driven approach for translating evidence into action.*  
44 *Otolaryngol Head Neck Surg.* 148(1 Suppl):S1-55.  
45  
46 32. The AGREE Collaboration. *The Appraisal of Guidelines for Research & Evaluation (AGREE)*  
47 *Instrument.* Available from <http://www.agreecollaboration.org>: Accessed. 29 Oct. 2013.  
48  
49 33. Scottish Intercollegiate Guidelines Network. *SIGN 50 A guideline developer's handbook.*  
50 Available from <http://www.sign.ac.uk/guidelines/fulltext/50/index.html> Accessed. 29 Oct.  
51 2013.  
52  
53 34. Canadian Medical Association. *Guidelines for Canadian clinical practice guidelines.*  
54 Available from <http://mdm.ca/cpgsnew/cpgs/gccpg-e.htm>: Accessed. 29 Oct. 2013.  
55  
56 35. Graneheim UH, Lundman B. (2004) Qualitative content analysis in nursing research:  
57 concepts, procedures and measures to achieve trustworthiness. *Nurse Educ Today.*  
58 24(2):105-112.  
59  
60

1  
2  
3  
4  
5  
6  
7 **Figure 1 Selection process of included studies**

8  
9  
10 **Figure 2: The process of including equity in CPGs**

11  
12 **Appendix 1 Data extraction form**

13  
14  
15 **Appendix 2 The process of content analysis**

16  
17  
18 **Appendix 3 Content analysis of individual paper**

For Peer review only



1  
2  
3  
4  
5  
6  
7  
8  
9  
10  
11  
12  
13  
14  
15  
16  
17  
18  
19  
20  
21  
22  
23  
24  
25  
26  
27  
28  
29  
30  
31  
32  
33  
34  
35  
36  
37  
38  
39  
40  
41  
42  
43  
44  
45  
46  
47  
48  
49  
50  
51  
52  
53  
54  
55  
56  
57  
58  
59  
60

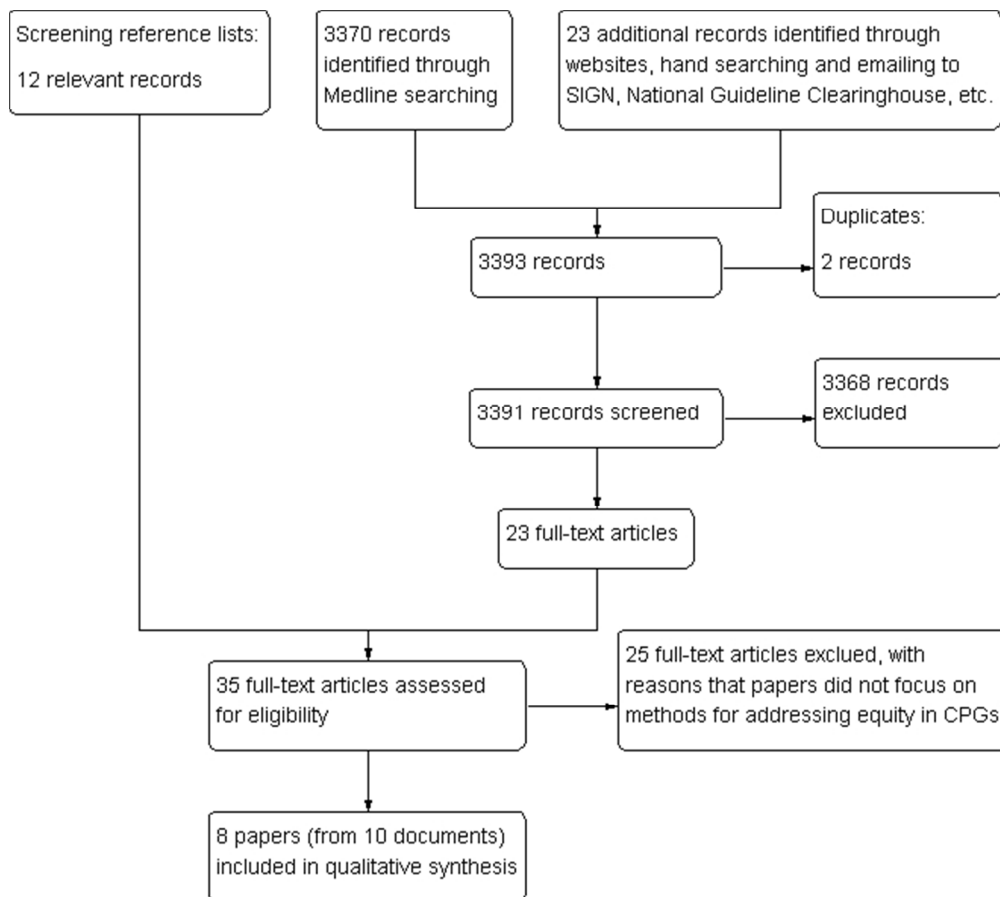

233x208mm (72 x 72 DPI)

only



Figure 2: The process of including equity in CPGs

1  
2  
3  
4  
5  
6  
7  
8  
9  
10  
11  
12  
13  
14  
15  
16  
17  
18  
19  
20  
21  
22  
23  
24  
25  
26  
27  
28  
29  
30  
31  
32  
33  
34  
35  
36  
37  
38  
39  
40  
41  
42  
43  
44  
45  
46  
47  
48  
49  
50  
51  
52  
53  
54  
55  
56  
57  
58  
59  
60

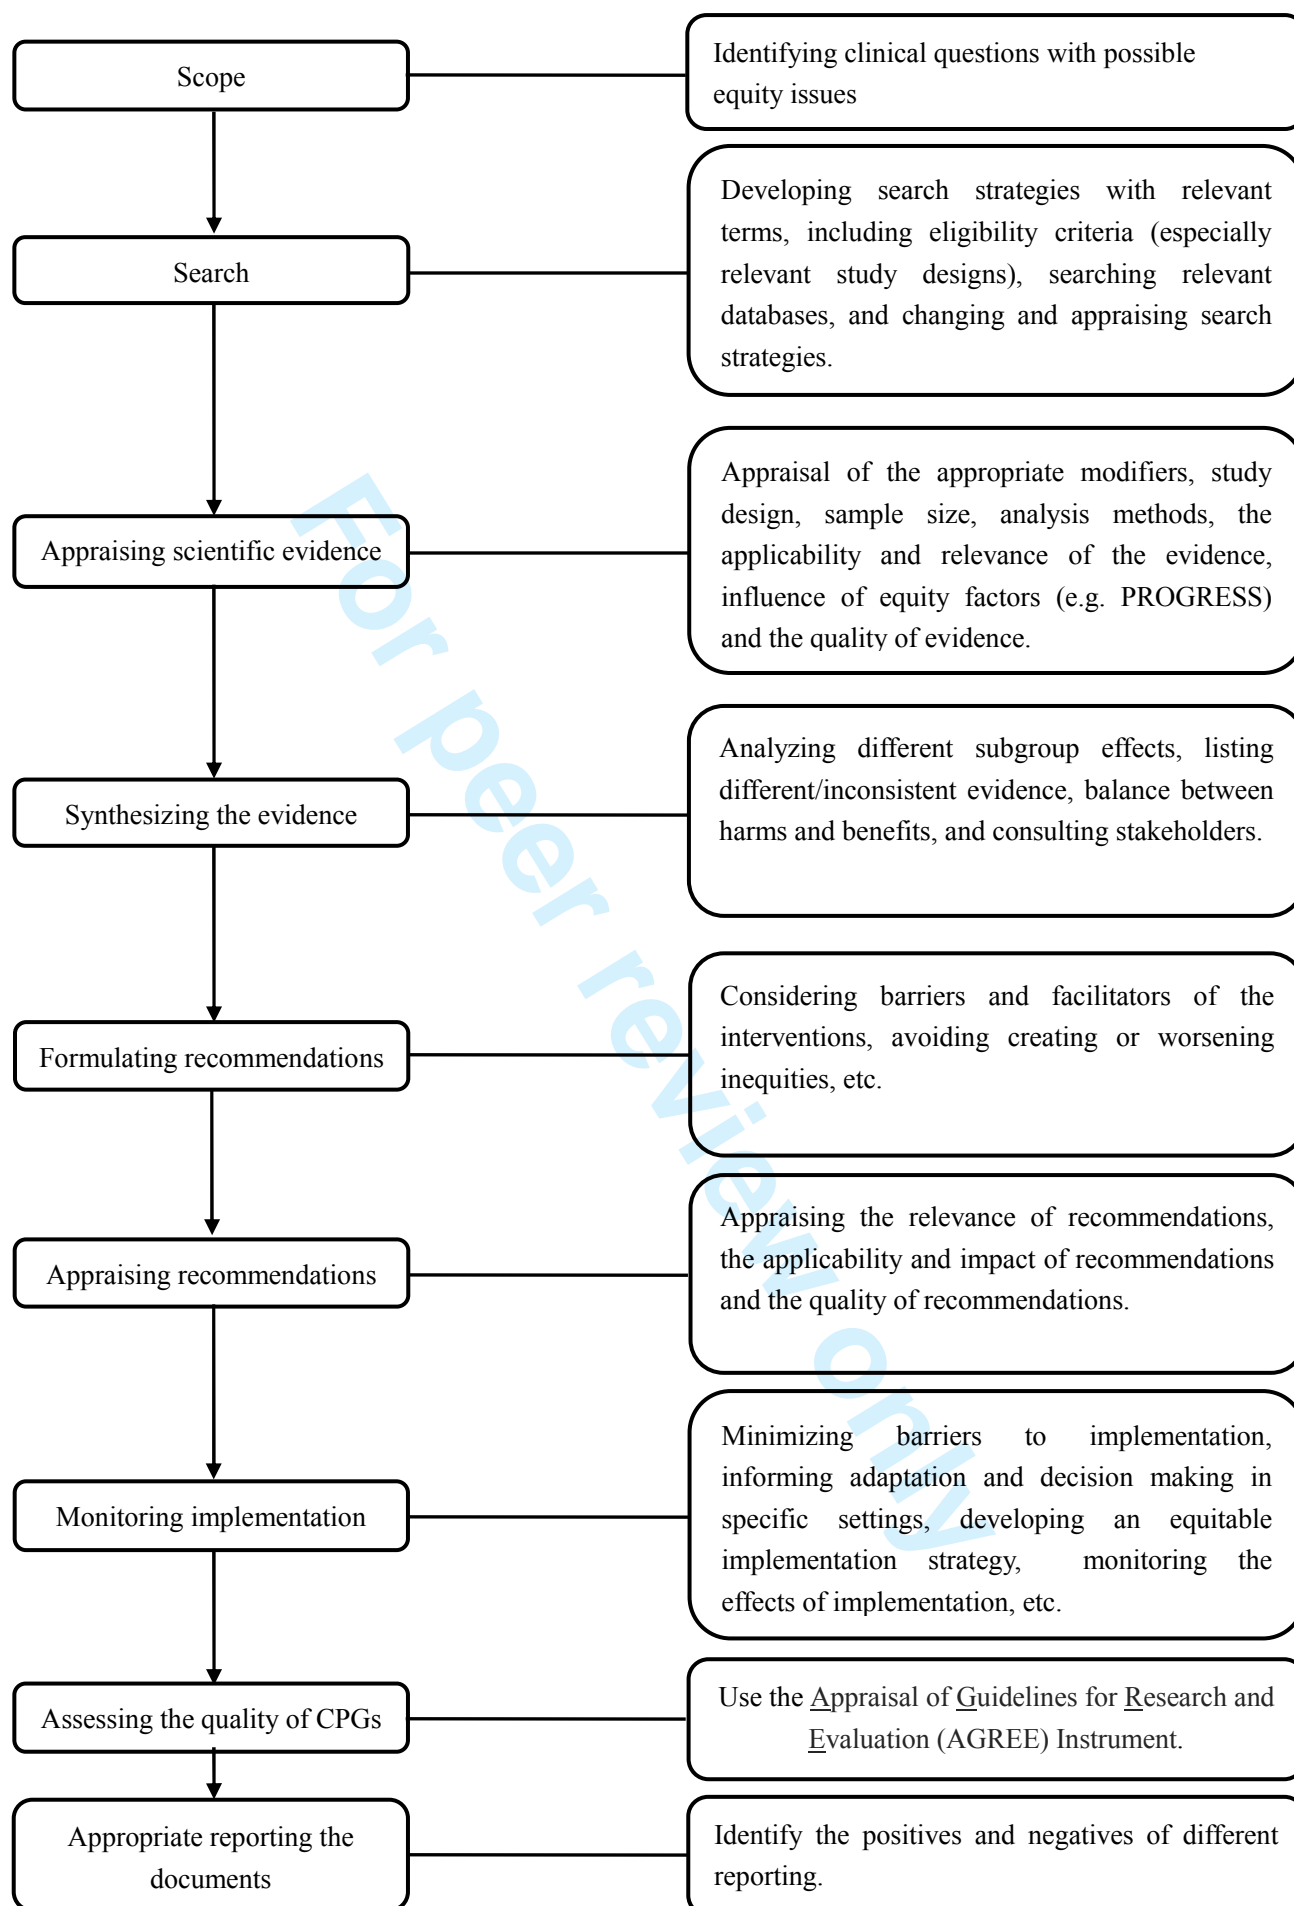

## Appendix 1 Data extraction form

| ID                                                 |                                        | Answers          |
|----------------------------------------------------|----------------------------------------|------------------|
| Date                                               |                                        | __/__/__ (M/D/Y) |
| Reviewers                                          |                                        | _____            |
| Study details                                      |                                        | Descriptions     |
| Title                                              |                                        |                  |
| First author                                       |                                        |                  |
| Year of publication                                |                                        |                  |
| Journal's name                                     |                                        |                  |
| Information type                                   |                                        | Please specify:  |
|                                                    |                                        |                  |
|                                                    |                                        |                  |
| Checklists or frameworks, etc for content analysis |                                        |                  |
| No.                                                | Checklists items/frameworks components |                  |
| 1                                                  |                                        |                  |
| 2                                                  |                                        |                  |
| 3                                                  |                                        |                  |
| 4                                                  |                                        |                  |
| ...                                                |                                        |                  |
| ...                                                |                                        |                  |

1  
2  
3  
4  
5  
6  
7  
8  
9  
10  
11  
12  
13  
14  
15  
16  
17  
18  
19  
20  
21  
22  
23  
24  
25  
26  
27  
28  
29  
30  
31  
32  
33  
34  
35  
36  
37  
38  
39  
40  
41  
42  
43  
44  
45  
46  
47  
48  
49

Identifying units

Analysis

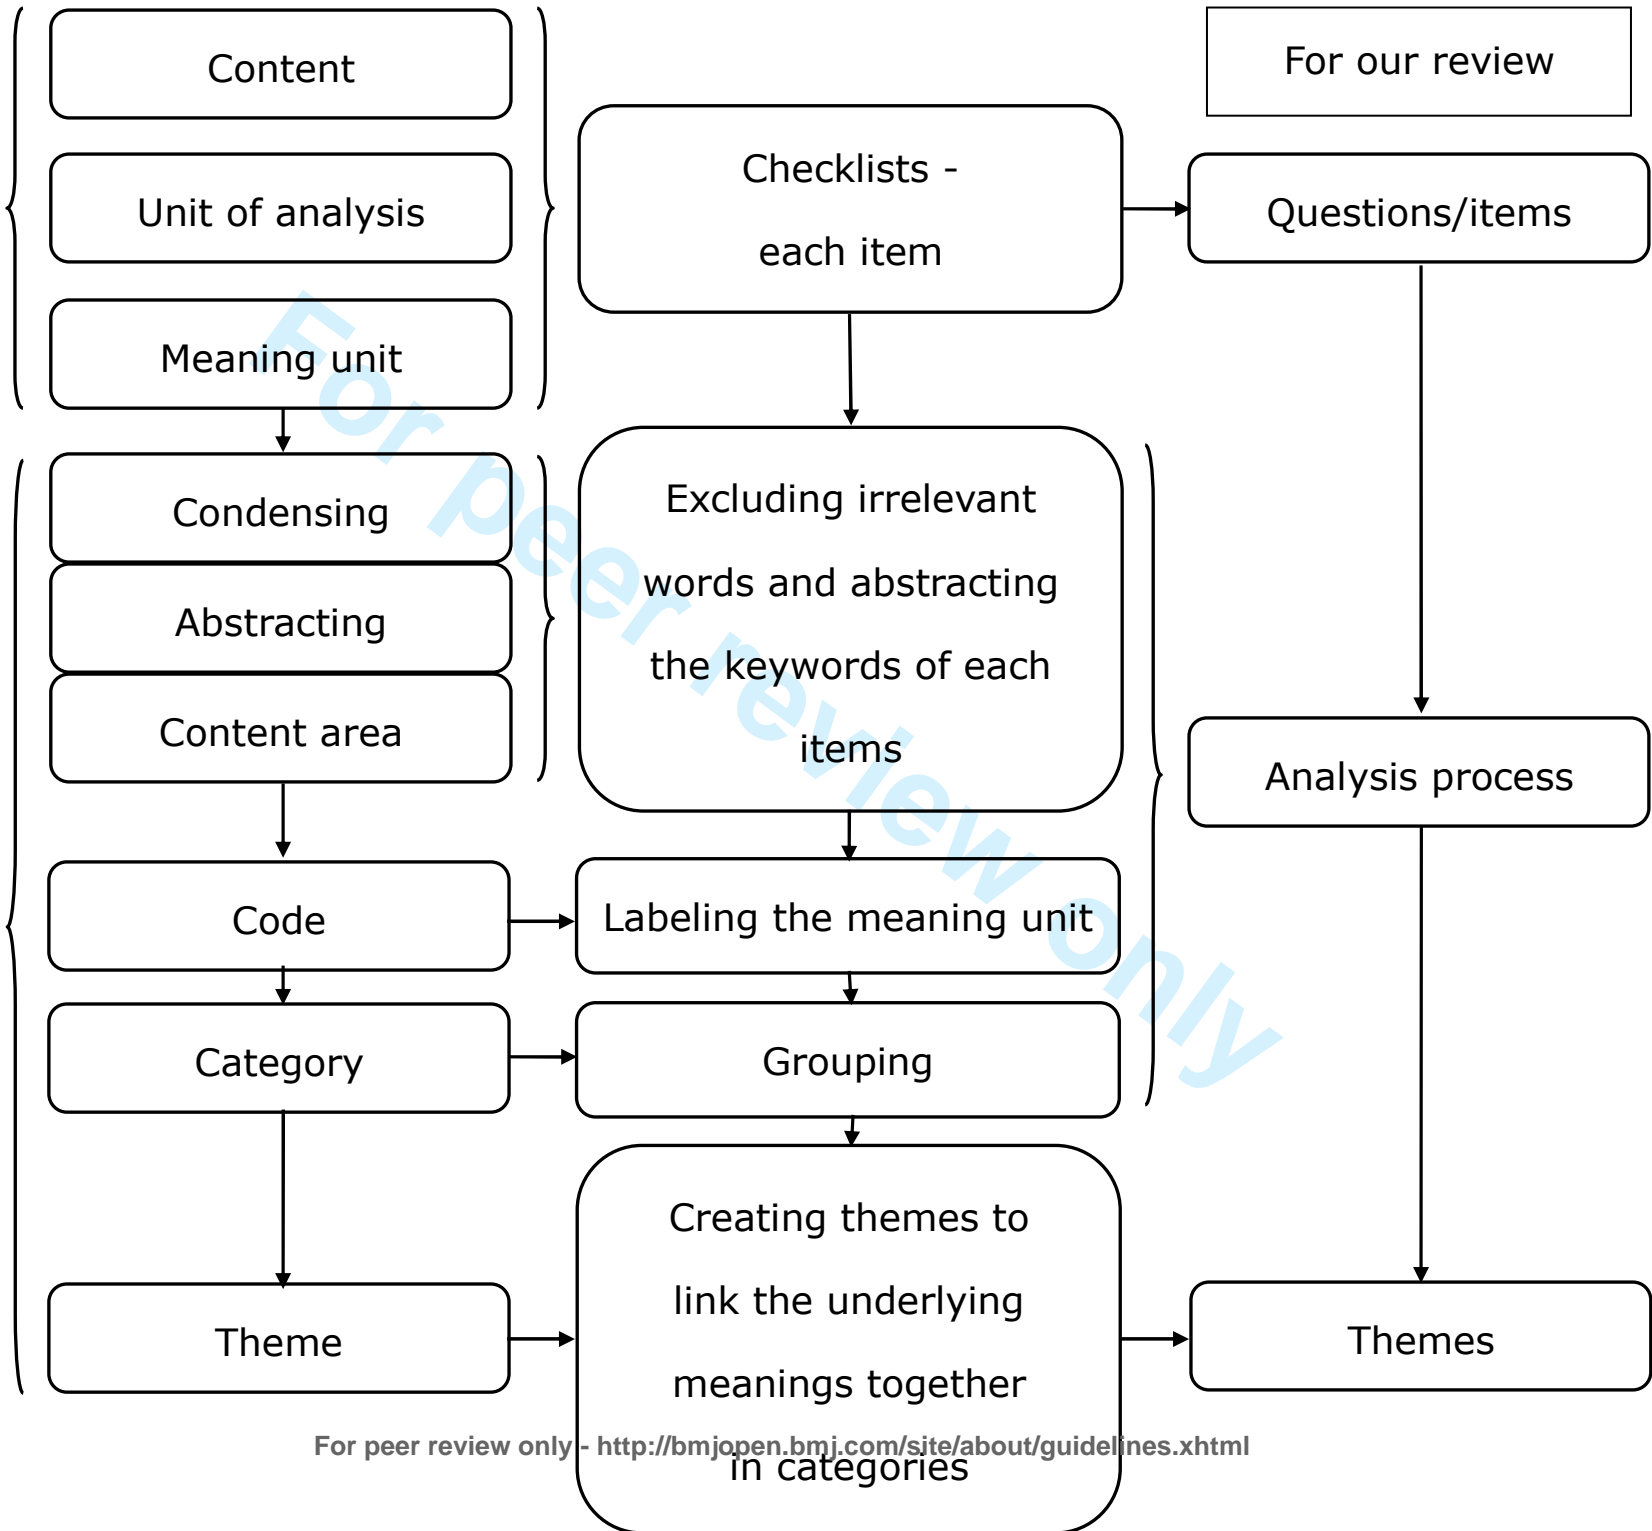

**BMJ Open**  
**Appendix 3 Content analysis of individual paper**

| Items                                                                                                                                                                                                                                                                                                                                                                                                                                                                                                                                                                                                                                                                                                                                                                                                                                                                                                                                           | Categories                                                                                                                                                                                                                                                       | Coding                                                                                                                                                                                                            | Themes                                                                                                                |
|-------------------------------------------------------------------------------------------------------------------------------------------------------------------------------------------------------------------------------------------------------------------------------------------------------------------------------------------------------------------------------------------------------------------------------------------------------------------------------------------------------------------------------------------------------------------------------------------------------------------------------------------------------------------------------------------------------------------------------------------------------------------------------------------------------------------------------------------------------------------------------------------------------------------------------------------------|------------------------------------------------------------------------------------------------------------------------------------------------------------------------------------------------------------------------------------------------------------------|-------------------------------------------------------------------------------------------------------------------------------------------------------------------------------------------------------------------|-----------------------------------------------------------------------------------------------------------------------|
| <p>11ava-Schmalbach J 2011 [16]</p> <p>2</p> <p>3</p> <p>4 Differential effectiveness by social groups of interventions</p> <p>5 could diminish final effectiveness of CPG in the General</p> <p>6 Social Security and Health System (GSSHS);</p> <p>7 To not consider geographical, ethnic, socioeconomic,</p> <p>8 cultural and access diversity issues within the CPG could have</p> <p>9 a potential negative impacts of the CPG;</p> <p>10</p> <p>11 Overall effectiveness of GPC could be better if equity</p> <p>12 issues are included in the quality verification checklist of the</p> <p>13 guideline questions;</p> <p>14</p> <p>15 Incorporating equity issues in the process of developing</p> <p>16 CPG could be cost effective, because improve overall</p> <p>17 effectiveness of CPG.</p> <p>18</p> <p>19 Note: This article discussed why equity issues should be addressed into guidelines</p> <p>20</p> <p>21</p> <p>22</p> | <p>The negative impact of differential effectiveness</p> <p>across groups</p> <p>The negative impact regardless of equity issues</p> <p>Better effectiveness of guideline when equity is</p> <p>included</p> <p>Improving overall effectiveness of guideline</p> | <p>reasons for addressing</p> <p>equity in guideline</p> <p>Why to address equity into</p> <p>guideline</p> <p>Why to address equity into</p> <p>guideline</p> <p>Why to address equity into</p> <p>guideline</p> | <p>Scope</p> <p>Scope</p> <p>Scope</p> <p>Scope</p> <p>Scope</p>                                                      |
| <p>23</p> <p>24</p> <p>25</p> <p>26</p> <p>27</p> <p>28</p> <p>29</p> <p>30</p> <p>31</p> <p>32</p> <p>33</p> <p>34</p> <p>35</p> <p>36</p> <p>37</p> <p>38</p> <p>39</p> <p>40</p> <p>41</p> <p>42</p> <p>43</p> <p>44</p>                                                                                                                                                                                                                                                                                                                                                                                                                                                                                                                                                                                                                                                                                                                     | <p>The equity lens</p>                                                                                                                                                                                                                                           | <p>Equity issues</p> <p>Equity issues</p> <p>Formulating</p> <p>recommendation, appraisal</p> <p>of the scientific evidence</p> <p>Implementation</p> <p>Appraisal of</p> <p>recommendation</p>                   | <p>Scope</p> <p>Scope</p> <p>Appraisal, formulating</p> <p>recommendations</p> <p>Implementation</p> <p>Appraisal</p> |
| <p>45</p> <p>46</p> <p>47</p> <p>48</p> <p>49</p>                                                                                                                                                                                                                                                                                                                                                                                                                                                                                                                                                                                                                                                                                                                                                                                                                                                                                               | <p>For peer review only - <a href="http://bmjopen.bmj.com/site/about/guidelines.xhtml">http://bmjopen.bmj.com/site/about/guidelines.xhtml</a></p>                                                                                                                | <p>Coding</p>                                                                                                                                                                                                     | <p>Themes</p>                                                                                                         |

1. When and how should inequities be addressed in systematic reviews that are used as background documents for recommendations?

2 The following question should routinely be considered: are  
3 there plausible reasons for anticipating differential relative  
4 effects across disadvantaged and advantaged populations?  
5 If there are plausible reasons for anticipating differential  
6 effects, additional evidence should be included in a review  
7 to inform judgments about the likelihood of differential  
8 effects.

9 What questions about equity should routinely be addressed  
10 by those making recommendations on behalf of WHO? (the  
11 following additional questions should routinely be considered)

12 How likely is it that the results of available research are  
13 applicable to disadvantaged populations and settings?

14 How likely are differences in baseline risk that would result  
15 in differential absolute effects across disadvantaged and  
16 advantaged populations?

17 How likely is it that there are important differences in  
18 trade-offs between the expected benefits and harms across  
19 disadvantaged and advantaged populations?

20 Are there different implications for disadvantaged and  
21 advantaged populations, or implications for addressing  
22 inequities?

23 What context specific information is needed to inform  
24 adaptation and decision making in a specific setting with  
25 regard to impacts on equity?

26 Those making recommendations on behalf of WHO should  
27 routinely consider and offer advice about the importance of  
28 the following types of context specific data that might be  
29 needed to inform adaptation and decision making in a  
30 specific setting: Effect modifiers for disadvantaged  
31 populations and for the likelihood of differential effects;  
32 Baseline risk in relationship to social and economic status;  
33 Utilization and access to care in relationship to social and  
34 economic status; Costs in relationship to social and  
35 economic status; Ethics and laws that may impact on

Differential effects across groups is indicated to address equity

When to address equity

Scope

Equity issues

Equity issues

Scope

Assessing applicability of available evidence

Appraisal of scientific evidence

Appraisal, scope

Assessing effects of baseline risk across groups

Appraisal the difference between groups

Appraisal, scope

Assessing the balance between benefits and harms across groups

Appraisal the needs of evidences

Appraisal, scope

Assessing the needs of evidence implications

Appraisal the needs of evidences

Appraisal, scope

Informing adaptation and decision making

Implementation of guidelines in specific setting

Implementation

Effect modifiers, baseline risk, access to interventions, costs, ethics and availability of resources should be used to inform adaptation

strategies for addressing inequities; Availability of resources to address inequities.

|                                                                                                                                                                                                                                                                                                                                                                                                                       |                                       |                |                |
|-----------------------------------------------------------------------------------------------------------------------------------------------------------------------------------------------------------------------------------------------------------------------------------------------------------------------------------------------------------------------------------------------------------------------|---------------------------------------|----------------|----------------|
| 4.1 What implementation strategies are likely be needed to ensure that recommendations are implemented equitably?                                                                                                                                                                                                                                                                                                     | Equitable implementation strategy     |                |                |
| 3 Organizational changes are likely to be important to address 5 inequities. While it may only be possible to consider these 6 in relationship to specific settings, consideration should be 7 given to how best to provide support for identifying and 8 addressing needs for organizational changes. In countries 9 with pervasive inequities institutional, cultural and political 10 changes may first be needed. | Organizational changes                | Implementation | Implementation |
| 13 Appropriate indicators of social and economic status should 14 be used to monitor the effects of implementing 15 recommendations on disadvantaged populations and on 16 changes in social and economic status.                                                                                                                                                                                                     | Monitor the effects of implementation |                |                |
| 5.1 What 'maps' are available of the different dimensions of 19 inequity locally?                                                                                                                                                                                                                                                                                                                                     | Appraisal of local setting inequities | Implementation | Implementation |

Note

Acosta N 2011 [23]

| Items                                                                                                                                                                  | Categories                                                      | Coding                                             | Themes                |
|------------------------------------------------------------------------------------------------------------------------------------------------------------------------|-----------------------------------------------------------------|----------------------------------------------------|-----------------------|
| 12 Target population involvement during all phases of 27 designing, implementing and evaluating CPG;                                                                   | Equity is necessary to all phases of the 28 development process | Appraisal of the quality of 29 development process | Appraisal             |
| 230 "Cultural capacity" seen as being necessary in CPGs' 31 cultural translation" for interventions to have less disparity 32 regarding their application and results; | Cultural capacity is necessary for guideline                    | Equity issues                                      | Scope                 |
| 334 Considering psycho-social factors which could affect 35 implementing CPG;                                                                                          | Psycho-social factors, facilitators of 36 implementation        | Equity issues, 37 implementation                   | Scope, implementation |
| 4.37 Considering system inequities so that any health 38 intervention would also confront risks and obstacles to health 39 care due to socioeconomic status.           | Socioeconomic status                                            | Equity issues                                      | Scope                 |

Note

NICE 2012 [24, 25]

| Items | Categories | Coding | Themes |
|-------|------------|--------|--------|
|-------|------------|--------|--------|

The protected characteristics; Equality in guideline development

The protected characteristics are: age, disability, gender reassignment, pregnancy and maternity, race, religion or belief, sex, sexual orientation, marriage and civil partnership, socio-economic, other

Population characteristics of equity issues

Equity issues

Scope

**Checklist for scoping**

51. What are the potential equality or discrimination issues linked to the guideline topic?

Equity issues

Equity issues

Scope

8Are there inequalities in prevalence, risk factors or impact - or in use or benefit - related to the topic or intervention?

Equity in prevalence or risk factors

Equity issues

Scope

10Is the condition more common, or is its severity greater, in people from a specific group or with a particular disability?

Prevalence of equity condition

Equity issues

Scope

13Is there a risk of discrimination?

Equitable scoping

Equitable scoping

Scope

15Do comments from stakeholders highlight the potential for direct or indirect discrimination, or for promoting equality?

Comments on equity issues

Comments for scoping

Scope

17Should any changes be made to the scope?

Considering factors on changes in scope

19Consider the degree of relevance to equality, and the proportionate response in relation to this. The greater the relevance of a function to equality, the greater the regard that should be paid to equality issues.

Considering relevance of equity to change scope

Changes on scope

Scope

24Consider the views of stakeholders.

Considering comments from stakeholders

25Summarize any changes made at this stage.

Summarize changes

27Identify any information gaps that have been identified.

Identify evidence gaps

28As it currently stands, is the scope discriminatory?

Considering some factors on scoping

30Have groups who need special consideration been identified?

Identify potential special groups

Equitable scoping

Scope

32Are there any exclusions?

Exclusion criteria

34If there are exclusions, are the reasons legitimate, and is the exclusion proportionate?

Equitable and appropriate exclusion

36Should any further information be identified and assessed?

Identifying and assessing further information

39Have important stakeholders been omitted from or not responded to the consultation process?

Consulting stakeholders' comments

Consulting comments in scoping stage

Scope

42Consider specific questions for stakeholders (for example, at the scoping workshop).

Consulting stakeholders' comments

44Summarize the action to be taken.

Taking action

46Is there anything specific that should be done to ensure that the guideline development group (GDG) will have

Further review of comments/through specific questions/Specific questions in

scoping stage

Scope

1. Relevant information to consider equalities issues when developing guidance?

1. Action to address this needs only to be proportionate.

2. Consider specific questions for stakeholders.

3. Consider relevant bodies to consult.

### 5. Checklist for early guideline development

6. 1. How relevant is the evidence to eliminating

7. discrimination, advancing equality and fostering good

9. relations?

10. 11. Do the review questions reflect the scope?

11. Do they identify issues affecting specific groups?

13. 13. Was the search strategy comprehensive?

14. Consider a range of study of types for addressing the review

16. questions (such as qualitative studies).

17. 14. Were particular issues identified during consultation on

18. the scope?

20. Consider amending the search strategy in the light of

21. comments.

23. 15. Were the evidence review criteria inclusive?

24. Check that criteria do not inappropriately exclude studies on

25. specific groups.

27. 16. What is the state of the evidence base?

28. Where are the evidence gaps?

### 30. Checklist for formulating recommendations

#### 31. General questions

32. 31. How relevant are the recommendations to discrimination

33. and equality? Which recommendations are likely to be most

35. relevant?

36. 32. Where evidence is unavailable to assess a potential issue,

37. could this be reflected in recommendations for future

39. research?

#### 41. Questions to consider to avoid discrimination include:

42. Summarizing the following questions:

43. 43. Access of interventions, barriers and facilitators

44. of interventions, and appraisal of the access to

45. avoid inequity during formulating

47. 47. Does access to the intervention depend on membership of

49.

Appropriate action

Consider specific questions for stakeholders

Consulting relevant bodies

Relevance of evidence

Appraisal of scientific  
evidence

Appraisal

Effectiveness of clinical questions

Appraisal of effects on  
scoping

Appraisal

Comprehensive search strategy (appropriate  
study design)

Appraisal of search  
strategy

Appraisal, searching

Considering comments to change search strategy  
to collect necessary evidence

Appraisal of the necessary  
on evidence and making  
changes

Appraisal

Appropriate and inclusive criteria of eligibility  
studies

Appraisal of eligible  
criteria

Appraisal, searching

Evidence gaps and evidence state

Appraisal of evidence gaps

Appraisal



a specific group?

2. Do any criteria make it easier or more difficult in practice for people in a specific group to gain access to the intervention?

Barriers and facilitators of the access of interventions

3. Does the way in which people would be assessed for whether or not they receive the intervention make it easier or more difficult for people in a specific group to gain access to it?

Assessing the barriers and facilitators of the access of interventions

4. Does any part of the recommendation make it plausible that a person's age, disability, gender reassignment, pregnancy and maternity, marriage or civil partnership, race (including ethnic or national origins, color or nationality), religion or belief (including lack of belief), sex, sexual orientation or socioeconomic status could affect their access to an intervention? If so, what steps could be taken to address this?

Effects of equity on access to interventions

5. Does any recommendation refer to age? If so, is age a good indicator of either risk or benefit from treatment and is the reason for the reference explained?

Effects of age on recommendations

6. Do comments from stakeholders highlight areas of possible discrimination or ways of avoiding it?

Comments

**Questions to consider to advance equality of opportunity include:**

Summarizing the following questions:

Assessing and advancing the effectiveness and availability of recommendations, and access to interventions

Appraisal and advancing recommendations

Appraisal, formulating recommendations

7. Could the recommendations advance equality for people in a specific group, either through access to the intervention or by means of the intervention? Have stakeholders identified particular opportunities?

Advancing equity

8. Could the recommendations be reformulated to make implementation more acceptable to, or appropriate for, people in a specific group?

Change of recommendations

9. Would more favorable treatment of any kind help disabled people to gain access to the intervention on the same basis as people without that disability? What additional measures would achieve this?

Equitable access to interventions

For peer review only - <http://bmjopen.bmj.com/site/about/guidelines.xhtml>

10. Do comments from stakeholders highlight opportunities

Comments

For advancing equality?

**Questions to consider to foster good relations include:**

|                                                          |                                                 |                           |                             |
|----------------------------------------------------------|-------------------------------------------------|---------------------------|-----------------------------|
| 11. Is there an opportunity to tackle prejudice?         | Foster relations of recommendations with equity | Adjusting recommendations | Formulating recommendations |
| 12. Is there an opportunity to promote understanding?    |                                                 |                           |                             |
| 13. Do comments from stakeholders highlight the need for |                                                 |                           |                             |
| 14. Do comments from stakeholders highlight the need for |                                                 |                           |                             |
| 15. Do comments from stakeholders highlight the need for |                                                 |                           |                             |

Note: Describing a process of development: topic scoping, assessing the evidence, draft guideline, final guideline.

Providing some examples on how to addressing equity into guidelines

Aldrich 2003 [17], NHMRC 2002 [26]

| 12 Items                                                                                                                                                                                                                                                                                                                                                    | 13 Categories                                                         | 14 Coding                           | 15 Themes    |
|-------------------------------------------------------------------------------------------------------------------------------------------------------------------------------------------------------------------------------------------------------------------------------------------------------------------------------------------------------------|-----------------------------------------------------------------------|-------------------------------------|--------------|
| 16 SEP refers to the components of economic and social well-being in a societal context. It is a concept that includes both: resource-based measures such as income and educational qualifications; and prestige-based measures such as an individual's rank or status in a social hierarchy, for example the prestige associated with certain occupations. | 17 Definitions of SEP                                                 | 18 Equity issues                    | 19 Scope     |
| 20 Table 2: Markers and search terms for socioeconomic position                                                                                                                                                                                                                                                                                             | 21 Providing some markers and search terms for socioeconomic position | 22 Search terms                     | 23 Search    |
| 24 Socioeconomic status as an effect modifier in RCTs                                                                                                                                                                                                                                                                                                       | 25 Assessing the impact of SEP and health in RCTs.                    | 26 Appraisal scientific evidence    | 27 Appraisal |
| 28 Problems in extrapolation of RCTs to disadvantaged populations. "Randomized controlled trials frequently use homogeneous population samples and analyze the effects of simple, single interventions. Factors associated with consent, inclusion and exclusion are not always randomly distributed."                                                      | 29 Baseline characteristics and eligibility criteria in evidence body | 30 Targeted population              | 31 Scope     |
| 32 Assessing the quality of evidence on SEP. 'evidence exists on the various relationships between SEP and health in epidemiological, cohort, cross-sectional, observational, and qualitative studies.'                                                                                                                                                     | 33 Assessing the quality of evidence                                  | 34 Appraisal of scientific evidence | 35 Appraisal |
| 36 Literature review on the relationship between socioeconomic position and health and clinical practice guidelines. 'Guideline developers explicitly acknowledge evidence of the relationship between SEP and health and then use that evidence to shape and develop guidelines and associated                                                             | 37 Showing evidence on why equity should be addressed into guideline  | 38 Necessary of equity              | 39 Scope     |

recommendations for the broad population.’

A framework for using evidence on socioeconomic position in the development of clinical practice guidelines

|                                                                                                                                                                                                                                                                                                                                                                                                                                                                                                                | Framework                                                                                       | Framework                                                | Process                            |
|----------------------------------------------------------------------------------------------------------------------------------------------------------------------------------------------------------------------------------------------------------------------------------------------------------------------------------------------------------------------------------------------------------------------------------------------------------------------------------------------------------------|-------------------------------------------------------------------------------------------------|----------------------------------------------------------|------------------------------------|
| <p>Summarizing the following items</p> <p>Step 1: Identify the health decisions required.</p> <p>The health decision could be any type, from individual treatment decisions to the formulation of guidelines for whole communities. In the context of CPG development, there may be many decisions at different points in the diagnosis/treatment pathway for a single guideline.</p>                                                                                                                          | <p>Clinical decisions required</p>                                                              | <p>Equity issues</p>                                     | <p>Scope</p>                       |
| <p>Step 2: Search the literature for evidence that, due to SEP, population subgroups may experience barriers to and/or have limited capacity or opportunities to achieve equal health gains.</p> <p>The literature should be searched using markers of SEP, the condition or disease of interest, and the required health decision to identify population sub-groups which may experience barriers, limited capacity or opportunities to achieve the same health gains as other sub-groups or populations.</p> | <p>Searching evidence on equity</p>                                                             | <p>Equitable searching</p>                               | <p>Searching</p>                   |
| <p>Step 3: Search the literature to identify interventions that address barriers and/or opportunities to achieving equal health gains</p> <p>Literature describing interventions that attempt to address barriers to achieving equal health gains across sub-groups should be identified.</p>                                                                                                                                                                                                                  | <p>Searching and assessing equitable evidence on application</p>                                | <p>Appraisal of applications and searching evidences</p> | <p>Searching, appraisal</p>        |
| <p>Step 4: Synthesize evidence from Steps 2 and 3 and current clinical best practice evidence to develop recommendations</p> <p>Develop recommendations in order to achieve health gains in terms of mortality, morbidity, survival, well-being and equity.</p>                                                                                                                                                                                                                                                | <p>Formulating equitable recommendations</p>                                                    | <p>Formulating recommendations</p>                       | <p>Formulating recommendations</p> |
| <p>Other</p> <p>What to do when there is no evidence: broadening the search strategy; broadening the search scope; applying generic principles to promote health equity</p>                                                                                                                                                                                                                                                                                                                                    | <p>Change searching strategies, scope, and promotion strategies, when no evidence was found</p> | <p>Searching and implementation</p>                      | <p>Searching, implementation</p>   |
| <p>Note: Providing a process of guideline development</p> <p>Providing some examples and case study on how to develop guideline.</p>                                                                                                                                                                                                                                                                                                                                                                           |                                                                                                 |                                                          |                                    |
| <p>Keyken DG 2007 [27]</p>                                                                                                                                                                                                                                                                                                                                                                                                                                                                                     | <p>Recommendation for focusing on sex-related factors in guideline development</p>              |                                                          |                                    |
| <p>Items</p>                                                                                                                                                                                                                                                                                                                                                                                                                                                                                                   | <p>Categories</p>                                                                               | <p>Coding</p>                                            | <p>Themes</p>                      |
| <p>Formulation of initial key questions (and sub questions)</p> <p>Guideline developers should make an assessment to determine if there are any plausible reasons for anticipating differential</p>                                                                                                                                                                                                                                                                                                            | <p>Considering differential relative effects across gender</p>                                  | <p>Social determinants of target population</p>          | <p>Scope</p>                       |

relative effects for both sexes. If so, make sure that the key questions are formulated clearly to facilitate a review of the literature.

|                                                                                                                                                                                                                   |                                                                                                             |                                    |                                  |
|-------------------------------------------------------------------------------------------------------------------------------------------------------------------------------------------------------------------|-------------------------------------------------------------------------------------------------------------|------------------------------------|----------------------------------|
| Development of search strategies                                                                                                                                                                                  |                                                                                                             |                                    |                                  |
| Guideline developers should make sure that search strategies are capable of detecting evidence (both direct and indirect) that supports or refutes any hypothesized differential effects.                         | Importance of an equitable search strategy                                                                  | Search strategy                    | Search strategy                  |
| Appraisal of scientific evidence                                                                                                                                                                                  |                                                                                                             |                                    |                                  |
| Guideline developers should determine whether the studies they review are well designed.                                                                                                                          | Well designed studies                                                                                       | Assessing study design             | Appraisal                        |
| Guideline developers should determine whether the study population is stratified and whether it is sufficiently large for an analysis of differential effects on the basis of sex.                                | Large sample size for analysis across gender                                                                | Appraising sample size             | Appraisal                        |
| Guideline developers should determine whether the relevant subgroup analyses have been carried out correctly (in key studies).                                                                                    | Correctly subgroup analysis                                                                                 | Appraising analysis methods        | Appraisal                        |
| Guideline developers should determine whether sex is a modifier for the research outcome.                                                                                                                         | Sex as a modifier                                                                                           | Detecting modifiers                | Appraisal                        |
| Formulation of recommendations for the guideline                                                                                                                                                                  |                                                                                                             |                                    |                                  |
| Where appropriate, guideline developers may consider how likely it is that the results of published research are applicable to both men and women when formulating recommendations.                               | Applicability of study results                                                                              | Applicability of evidence          | Appraisal of scientific evidence |
| Where appropriate, guideline developers may consider how likely it is that differences in baseline risk would result in differential absolute effects when formulating recommendations.                           | Influences across baseline risk on absolute effects                                                         | Influence of equity evidences      | Appraisal of scientific evidence |
| Where appropriate, guideline developers may consider how likely it is that there are important differences in trade-offs between any anticipated harmful and beneficial effects when formulating recommendations. | Balance between harms and benefits                                                                          | Balance between harms and benefits | Formulate recommendations        |
| Where appropriate, guideline developers may consider whether any of these considerations warrant the use of different recommendations when formulating recommendations.                                           | Warrant on the usage of different recommendations                                                           | Equitable usage of recommendations | Monitor implementation           |
| Other (For composition of the guideline document)                                                                                                                                                                 |                                                                                                             |                                    |                                  |
| Guideline developers should have prior knowledge of the various ways in which sex-related factors can be represented                                                                                              | For peer review Knowledge of the various ways in which sex-related factors can be represented in guidelines | Variable reporting                 | Reporting                        |

in guidelines: when evidence has been found; if differences were expected but no evidence was found; if no information is available.

Selected sex-related factors may be mentioned in various subsections of the document: throughout the text; in specific paragraphs; in a subsection on special populations; in footnotes.

Highlighting the gender factor

Reporting

Reporting

It is useful to reflect on the advantages and disadvantages of each option before drafting the guideline.

Trade-offs between advantages and disadvantages of different reporting.

Assessing equitable reporting

Reporting

Note: Describing a process of development: formulation of initial key questions (and sub questions); development of search strategies; appraisal of scientific evidence; formulation of recommendations for the guideline; composition of the guideline document.

WHO 2012 [28]

| Items                                                                                                                                                                                                                                                                                                                                            | Categories                                                                                   | Coding               | Themes           |
|--------------------------------------------------------------------------------------------------------------------------------------------------------------------------------------------------------------------------------------------------------------------------------------------------------------------------------------------------|----------------------------------------------------------------------------------------------|----------------------|------------------|
| <p>Who is targeted by the action being recommended?</p> <p>(1) How can they be best described? What are the relevant demographic factors? Please consider age groups, sex, ethnicity, social identities, behavioral characteristics, etc.</p>                                                                                                    | <p>Population characteristics (including equity issues), subgroup and exclusion criteria</p> | <p>Equity issues</p> | <p>Scope</p>     |
| <p>(2) What is the setting? For example, hospitals, communities, schools.</p>                                                                                                                                                                                                                                                                    |                                                                                              |                      |                  |
| <p>(3) Are there any subgroups that might need to be considered?</p>                                                                                                                                                                                                                                                                             |                                                                                              |                      |                  |
| <p>(4) Are there groups or subgroups that should be excluded?</p>                                                                                                                                                                                                                                                                                |                                                                                              |                      |                  |
| <p>‘Figure 6.1 Evidence retrieval decision diagram’ provided a process on how to identify relevant systematic review, including social and educational policies and practices (the Campbell Collaboration). Eligibility studies from low- and middle-income countries and regional databases are highlighted in ‘Search strategies’ section.</p> | <p>Searching relevant studies to equity</p>                                                  | <p>Searching</p>     | <p>Searching</p> |
| <p>Note: Providing some examples on how to address equity issues into guidelines.</p>                                                                                                                                                                                                                                                            |                                                                                              |                      |                  |
| <p>Providing a process of developing questions: Step 1: Generate initial list of questions; Step 2: Draft PICO questions; Step 3: List relevant outcomes; Step 4: Comment and revise; Step 5: Rate outcomes; Step 6: Prioritize questions</p>                                                                                                    |                                                                                              |                      |                  |

## Text S1 - Checklist of items to include when reporting a systematic review or meta-analysis

| Section/topic             | # | Checklist item                                                                                                                                                                                                                                                                                              | Reported on page # |
|---------------------------|---|-------------------------------------------------------------------------------------------------------------------------------------------------------------------------------------------------------------------------------------------------------------------------------------------------------------|--------------------|
| <b>TITLE</b>              |   |                                                                                                                                                                                                                                                                                                             |                    |
| Title                     | 1 | Identify the report as a systematic review, meta-analysis, or both.                                                                                                                                                                                                                                         | 1                  |
| <b>ABSTRACT</b>           |   |                                                                                                                                                                                                                                                                                                             |                    |
| Structured summary        | 2 | Provide a structured summary including, as applicable: background; objectives; data sources; study eligibility criteria, participants, and interventions; study appraisal and synthesis methods; results; limitations; conclusions and implications of key findings; systematic review registration number. | 2                  |
| <b>INTRODUCTION</b>       |   |                                                                                                                                                                                                                                                                                                             |                    |
| Rationale                 | 3 | Describe the rationale for the review in the context of what is already known.                                                                                                                                                                                                                              | 2, 3               |
| Objectives                | 4 | Provide an explicit statement of questions being addressed with reference to participants, interventions, comparisons, outcomes, and study design (PICOS).                                                                                                                                                  | 3                  |
| <b>METHODS</b>            |   |                                                                                                                                                                                                                                                                                                             |                    |
| Protocol and registration | 5 | Indicate if a review protocol exists, if and where it can be accessed (e.g., Web address), and, if available, provide registration information including registration number.                                                                                                                               | No                 |
| Eligibility criteria      | 6 | Specify study characteristics (e.g., PICOS, length of follow-up) and report characteristics (e.g., years considered, language, publication status) used as criteria for eligibility, giving rationale.                                                                                                      | 3                  |
| Information sources       | 7 | Describe all information sources (e.g., databases with dates of coverage, contact with study authors to identify additional studies) in the search and date last searched.                                                                                                                                  | 3                  |
| Search                    | 8 | Present full electronic search strategy for at least one database, including any limits used, such that it could be repeated.                                                                                                                                                                               | 3                  |
| Study selection           | 9 | State the process for selecting studies (i.e., screening, eligibility, included in systematic review, and, if applicable, included in the meta-analysis).                                                                                                                                                   | 3, 4               |

| Section/topic                      | #  | Checklist item                                                                                                                                                                                                         | Reported on page # |
|------------------------------------|----|------------------------------------------------------------------------------------------------------------------------------------------------------------------------------------------------------------------------|--------------------|
| Data collection process            | 10 | Describe method of data extraction from reports (e.g., piloted forms, independently, in duplicate) and any processes for obtaining and confirming data from investigators.                                             | 3, 4               |
| Data items                         | 11 | List and define all variables for which data were sought (e.g., PICOS, funding sources) and any assumptions and simplifications made.                                                                                  | 4                  |
| Risk of bias in individual studies | 12 | Describe methods used for assessing risk of bias of individual studies (including specification of whether this was done at the study or outcome level), and how this information is to be used in any data synthesis. | No. Unnecessary    |
| Summary measures                   | 13 | State the principal summary measures (e.g., risk ratio, difference in means).                                                                                                                                          | No. Unnecessary    |
| Synthesis of results               | 14 | Describe the methods of handling data and combining results of studies, if done, including measures of consistency (e.g., $I^2$ ) for each meta-analysis.                                                              | 4                  |
| Risk of bias across studies        | 15 | Specify any assessment of risk of bias that may affect the cumulative evidence (e.g., publication bias, selective reporting within studies).                                                                           | No. Unnecessary    |
| Additional analyses                | 16 | Describe methods of additional analyses (e.g., sensitivity or subgroup analyses, meta-regression), if done, indicating which were pre-specified.                                                                       | No. Unnecessary    |
| <b>RESULTS</b>                     |    |                                                                                                                                                                                                                        |                    |
| Study selection                    | 17 | Give numbers of studies screened, assessed for eligibility, and included in the review, with reasons for exclusions at each stage, ideally with a flow diagram.                                                        | 4                  |
| Study characteristics              | 18 | For each study, present characteristics for which data were extracted (e.g., study size, PICOS, follow-up period) and provide the citations.                                                                           | 4, 5               |
| Risk of bias within studies        | 19 | Present data on risk of bias of each study and, if available, any outcome-level assessment (see Item 12).                                                                                                              | No. Unnecessary    |
| Results of individual studies      | 20 | For all outcomes considered (benefits or harms), present, for each study: (a) simple summary data for each intervention group and (b) effect estimates and confidence intervals, ideally with a forest plot.           | No. Unnecessary    |
| Synthesis of results               | 21 | Present results of each meta-analysis done, including confidence intervals and                                                                                                                                         | 5, 6               |

| Section/topic               | #  | Checklist item                                                                                                                                                                        | Reported on page # |
|-----------------------------|----|---------------------------------------------------------------------------------------------------------------------------------------------------------------------------------------|--------------------|
|                             |    | measures of consistency.                                                                                                                                                              |                    |
| Risk of bias across studies | 22 | Present results of any assessment of risk of bias across studies (see Item 15).                                                                                                       | No. Unnecessary    |
| Additional analysis         | 23 | Give results of additional analyses, if done (e.g., sensitivity or subgroup analyses, meta-regression [see Item 16]).                                                                 | No. Unnecessary    |
| <b>DISCUSSION</b>           |    |                                                                                                                                                                                       |                    |
| Summary of evidence         | 24 | Summarize the main findings including the strength of evidence for each main outcome; consider their relevance to key groups (e.g., health care providers, users, and policy makers). | 6, 7               |
| Limitations                 | 25 | Discuss limitations at study and outcome level (e.g., risk of bias), and at review level (e.g., incomplete retrieval of identified research, reporting bias).                         | 7, 8               |
| Conclusions                 | 26 | Provide a general interpretation of the results in the context of other evidence, and implications for future research.                                                               | 8                  |
| <b>FUNDING</b>              |    |                                                                                                                                                                                       |                    |
| Funding                     | 27 | Describe sources of funding for the systematic review and other support (e.g., supply of data); role of funders for the systematic review.                                            | 8                  |



# BMJ Open

## How equity is addressed in clinical practice guidelines: a content analysis

|                                 |                                                                                                                                                                                                                                                                                                                                                                                                                                                                                                                                                                                                                                                                                                                                                                                                                                                                                                                                                                                      |
|---------------------------------|--------------------------------------------------------------------------------------------------------------------------------------------------------------------------------------------------------------------------------------------------------------------------------------------------------------------------------------------------------------------------------------------------------------------------------------------------------------------------------------------------------------------------------------------------------------------------------------------------------------------------------------------------------------------------------------------------------------------------------------------------------------------------------------------------------------------------------------------------------------------------------------------------------------------------------------------------------------------------------------|
| Journal:                        | <i>BMJ Open</i>                                                                                                                                                                                                                                                                                                                                                                                                                                                                                                                                                                                                                                                                                                                                                                                                                                                                                                                                                                      |
| Manuscript ID:                  | bmjopen-2014-005660.R1                                                                                                                                                                                                                                                                                                                                                                                                                                                                                                                                                                                                                                                                                                                                                                                                                                                                                                                                                               |
| Article Type:                   | Research                                                                                                                                                                                                                                                                                                                                                                                                                                                                                                                                                                                                                                                                                                                                                                                                                                                                                                                                                                             |
| Date Submitted by the Author:   | 23-Oct-2014                                                                                                                                                                                                                                                                                                                                                                                                                                                                                                                                                                                                                                                                                                                                                                                                                                                                                                                                                                          |
| Complete List of Authors:       | SHI, Chunhu; Evidence Based Medicine Centre, School of Basic Medical Sciences, Lanzhou University; Key Laboratory of Evidence Based Medicine and Knowledge Translation of Gansu Province, Tian, Jinhui; Evidence Based Medicine Centre of Lanzhou University; Key Laboratory of Evidence Based Medicine and Knowledge Translation of Gansu Province, WANG, Quan; Evidence Based Medicine Centre of Lanzhou University; Key Laboratory of Evidence Based Medicine and Knowledge Translation of Gansu Province, Petkovic, Jennifer; Centre for Global Health, University of Ottawa, Canada, REN, Dan; The First Clinical Medicine School, Lanzhou University; Evidence Based Medicine Centre of Lanzhou University, Yang, Kehu; Evidence Based Medicine Centre of Lanzhou University; Key Laboratory of Evidence Based Medicine and Knowledge Translation of Gansu Province, YANG, Yang; School of Nursing, Tianjin University of Traditional Chinese Medicine, Tianjin, China, 300193 |
| <b>Primary Subject Heading</b>: | Evidence based practice                                                                                                                                                                                                                                                                                                                                                                                                                                                                                                                                                                                                                                                                                                                                                                                                                                                                                                                                                              |
| Secondary Subject Heading:      | Public health                                                                                                                                                                                                                                                                                                                                                                                                                                                                                                                                                                                                                                                                                                                                                                                                                                                                                                                                                                        |
| Keywords:                       | Protocols & guidelines < HEALTH SERVICES ADMINISTRATION & MANAGEMENT, QUALITATIVE RESEARCH, PUBLIC HEALTH                                                                                                                                                                                                                                                                                                                                                                                                                                                                                                                                                                                                                                                                                                                                                                                                                                                                            |
|                                 |                                                                                                                                                                                                                                                                                                                                                                                                                                                                                                                                                                                                                                                                                                                                                                                                                                                                                                                                                                                      |

SCHOLARONE™  
Manuscripts

## How equity is addressed in clinical practice guidelines: a content analysis

Chunhu SHI<sup>1,2</sup>, Jinhui TIAN<sup>1,2</sup>, Quan WANG<sup>1,2,3</sup>, Jennifer Petkovic<sup>4</sup>, Dan REN<sup>2,3</sup>, Kehu YANG<sup>1,2</sup>  
Yang Yang<sup>5</sup>

1. Evidence-Based Medicine Center, School of Basic Medical Sciences, Lanzhou University;
2. Key Laboratory of Evidence Based Medicine and Knowledge Translation of Gansu Province;
3. The First Clinical Medicine School, Lanzhou University;
4. Centre for Global Health, University of Ottawa, Canada;
5. School of Nursing, Tianjin University of Traditional Chinese Medicine, Tianjin, China.

### Corresponding Author

Kehu YANG, Evidence Based Medicine Centre of Lanzhou University; Key Laboratory of Evidence Based Medicine and Knowledge Translation of Gansu Province. 199 Donggang West Road, Lanzhou, Gansu, China, 730000

E-mail: [kehuyangebm2006@126.com](mailto:kehuyangebm2006@126.com)

### Email addresses of all authors

Chunhu SHI: [shihchoonhrou@gmail.com](mailto:shihchoonhrou@gmail.com);

Jinhui TIAN: [tianjh@lzu.edu.cn](mailto:tianjh@lzu.edu.cn);

Quan WANG: [371438006@qq.com](mailto:371438006@qq.com);

Dan REN: [1290250592@qq.com](mailto:1290250592@qq.com);

Jennifer Petkovic: [jennifer.petkovic@uottawa.ca](mailto:jennifer.petkovic@uottawa.ca);

Kehu YANG: [kehuyangebm2006@126.com](mailto:kehuyangebm2006@126.com)

Yang Yang: [yang7273@126.com](mailto:yang7273@126.com)

### Author Contributions

- 1) Conceiving and designing this review: Chunhu SHI, Jinhui TIAN and Kehu YANG,
- 2) Searching, extracting data and analyzing the data: Chunhu SHI, Quan WANG and Kehu YANG,
- 3) Writing, amending and revising manuscript: Chunhu SHI, Jinhui TIAN, Dan REN, Jennifer Petkovic and Yang Yang,
- 4) When disagreements happened, discussing with Kehu YANG and Jinhui TIAN.
- 5) Final approval of manuscript: Chunhu SHI, Jinhui TIAN, Quan WANG, Dan REN, Jennifer Petkovic, Kehu YANG and Yang Yang,
- 6) Important comments and English editing: Jennifer Petkovic and Yang Yang

## Abstract

### Objectives

Considering equity into guidelines presents methodological challenges. This study aims to qualitatively synthesize the methods for incorporating equity in CPGs.

### Setting

Content analysis of methodological publications.

### Eligibility criteria for selecting studies

Methodological publications were included if they provided checklists/frameworks on when, how and to what extent equity should be incorporated in CPGs.

### Data sources

We electronically searched Medline, retrieved references, and browsed guideline development organization websites from inception to Jan 2013. After study selection by two authors, general characteristics and checklists items/framework components from included studies were extracted. Based on the questions or items from checklists/frameworks (unit of analysis), content analysis was conducted to identify themes and questions/items were grouped into these themes.

### Primary outcomes

The primary outcomes were methodological themes and processes on how to address equity issues in guideline development.

### Results

8 studies with 10 publications were included from 3405 citations. In total, a list of 87 questions/items was generated from 17 checklists/frameworks. After content analysis, questions were grouped into 8 themes (“scoping questions”, “searching relevant evidence”, “appraising evidence and recommendations”, “formulating recommendations”, “monitoring implementation”, “providing a flow chart to include equity in CPGs”, and “others: reporting of guidelines and comments from stakeholders” for CPG developers and “assessing the quality of CPGs” for CPG users). Four included studies covered more than five of these themes. We also summarized the process of guideline development based on the themes mentioned above.

### Conclusion

For disadvantaged population-specific CPGs, eight important methodological issues identified in this review should be considered when including equity in CPGs under the guidance of a scientific guideline development manual.

### Strengths and limitations of this study

- Methodological challenges are the barriers of incorporating equity into guidelines. For this topic, this study synthesizes some themes (“scoping questions”, “searching relevant evidence”, “appraising evidence and recommendations”, “formulating recommendations”, “monitoring implementation”, “providing a flow chart to include equity in CPGs”, and “others: reporting of guidelines and comments from stakeholders” for CPG developers and “assessing the quality of CPGs” for CPG users) and a developing process through a content analysis of eight studies.
- These findings allow the guideline panel to consider equity issues into guidelines and contribute methodologists to develop a methodological document in future.
- These findings provide some valuable guidance, however no statement on methodological issues in equity or new checklist is built.

## Background

Health is defined by the World Health Organization (WHO) as “a state of complete physical, mental and social well-being and not merely the absence of disease or infirmity”<sup>[1]</sup>. Health outcomes can be influenced by inaccessibility to health interventions for certain population groups, such as the poor and because of unequal distribution of medical resources. When differences in health outcomes across socioeconomic, demographic and geographic factors are avoidable, unnecessary and unjust they are described as health inequities<sup>[2,3]</sup>. The WHO recognizes that inequities in health should be reduced since health is a fundamental human right<sup>[4]</sup> and, in 2005, set up the Commission on Social Determinants of Health to collect, collate, and synthesize evidence on inequities and to make recommendations for action to address them<sup>[5]</sup>.

Inequities in health and health care are well documented in relation to social and economic factors, according to the acronym PROGRESS-Plus, including Place of residence, Race/ethnicity/culture/language, Occupation, Gender/sex, Religion, Education, Socioeconomic status and Social capital<sup>[6]</sup> and additional factors related to personal characteristics, features of relationships, and time-dependent characteristics (captured by “Plus”)<sup>[7]</sup>. Equity issues have been shown to have negative effects on health status<sup>[8-13]</sup>. For example, as Wallace et al.<sup>[14]</sup> reported, the HIV epidemics structure in the US was influenced by two such determinants, the link between geographic regions and the socioeconomic structure, function, and history of the regions.

Clinical practice guidelines, as defined by the Institute of Medicine, are ‘systematically developed statements to assist practitioner and patient decisions about appropriate health care for specific clinical circumstances.’<sup>[15]</sup> They are an increasingly familiar part of clinical practice and may provide concise guidance on which assessment programs to order, how to provide medical or surgical interventions, or other details of clinical practice<sup>[16]</sup>. Guideline development is becoming more evidence-based<sup>[17]</sup>. CPGs advocate that the most effective therapies are recommended as suggested by the evidence, however, the most effective intervention may not be available to all groups within a population. For example, a new therapy may be effective, but CPG developers need to consider whether it is available (and sufficiently cost-effective) for disadvantaged populations<sup>[18]</sup>.

Therefore, CPG developers should discuss whether recommendations can ensure equitable provision of health care for the disadvantaged. Regardless of the setting, there is potential for the CPG to introduce inequities. Differences in health outcomes across population groups are possible if equity is not considered in guideline development. CPGs and their recommendations have the potential to create or increase health inequities<sup>[19]</sup>. The inclusion of equity considerations in CPG development and implementation has become increasingly important<sup>[20, 21]</sup>. For example, to balance the effective versus efficiency dilemma of CPGs, the National Health Service (NHS) recommends the development of guiding principles to support the pursuit of equity in health care<sup>[22]</sup>. However, incorporating equity into guidelines remains a challenge; the main barriers are methodological and conceptual limitations<sup>[20, 23]</sup>. We aimed to review methods for including equity considerations in CPGs in this paper.

## Present investigation

### Eligibility criteria

We conducted this review to investigate methodological guidance for including equity in CPGs. Only methodological guidance, guidelines, and articles that described when, how and to what extent equity issues could be incorporated in CPGs were included in this review. Types of eligible

1  
2  
3 studies included: guidelines for incorporating equity into CPGs, empirical literature discussing  
4 equity-specific methodological issues of CPG development, quantitative or qualitative literature  
5 reviews that identify equity-specific methodological elements of CPG development.  
6

### 7 **Information sources and search**

8 Relevant studies were obtained from the following sources.

- 9  
10 1) MEDLINE (1966 to Jan 2013) was electronically searched using an adapted version of the  
11 search strategy developed by Haase A et al. (2007) for the identification of clinical practice  
12 guidelines <sup>[24]</sup>: (recommendation[All Fields] OR "consensus"[MeSH Terms] OR  
13 "consensus"[All Fields] OR "guideline"[Publication Type] OR "guidelines as topic"[MeSH  
14 Terms] OR "guideline"[All Fields]) AND (equal\* OR equal[All Fields] OR "Civil  
15 Rights"[Mesh] OR equity[All Fields] OR equit\*) limited in "Humans and Title/Abstract";  
16  
17 2) Relevant studies were retrieved from reference lists of eligible articles;  
18  
19 3) In Jan 2013, we browsed guideline development organizations' websites including: National  
20 Institute for Health and Clinical Excellence (NICE), New Zealand Guidelines Group, Scottish  
21 Intercollegiate Guidelines Network (SIGN), Guideline International Network (G-I-N), CMA  
22 Infobase: Clinical Practice Guidelines, PUBGLE, Trip Database, and National Guideline  
23 Clearinghouse, etc.;
- 24  
25 4) Online publications from the 'International Journal for Equity in Health' (from 2002 to Jan  
26 2013) was hand-searched;  
27  
28 5) We also emailed SIGN, the New Zealand Guidelines Group and National Guideline  
29 Clearinghouse, etc. to access specific documents.

### 30 **Study selection and data collection process**

31 Authors CHS and QW independently screened titles and abstracts. The full text (if published) of  
32 all potentially relevant studies were retrieved and independently assessed for inclusion by QW and  
33 KHY. CHS and KHY carried out data extraction independently using a standard data extraction  
34 form (Appendix 1: Data extraction form). We planned to translate papers reported in non-English  
35 language journals (if any) before assessment. Where more than one publication on the same  
36 guidance existed, only the publication with the most complete data was included. Any further  
37 information or clarification required from the authors was requested by written or electronic  
38 correspondence and relevant data obtained in this manner were included in the review.  
39 Disagreements were resolved in consultation with co-authors.  
40

### 41 **Data items**

42 In this review, data items are the questions or items from all available instruments, checklists,  
43 critical appraisal tools and indices which were designed to guide the incorporation of equity issues  
44 into CPGs or assessing the quality of equity considerations within CPGs. No data on participants,  
45 interventions, comparators, clinical outcomes and study designs was extracted.  
46  
47

### 48 **Synthesis of results**

49 Written phrases were the unit of analysis and therefore no quantitative data were analyzed by  
50 specific software. Using content analysis, authors CHS and JHT synthesized methodological  
51 themes and processes on how to address equity issues in guideline development. Content analysis  
52 is 'a research technique for making replicable and valid inferences from data to their context.'<sup>[25]</sup>,  
53 which 'emphasizes the quantification of the 'what' that messages communicate, the 'who' (the  
54 source), the 'why' (the encoding process) and the consequences of 'effects' they have 'on whom'  
55 <sup>[25]</sup>, by which themes can be summarized from meaningful qualitative data. A simplified process  
56  
57  
58  
59  
60

1  
2  
3 was used in this review: identifying units of analysis (the items/questions), excluding irrelevant  
4 information, abstracting the phrase or words from each unit of analysis, labeling these concepts,  
5 grouping them, and creating themes to link the underlying concepts together in categories.  
6 (Appendix 2: The process of content analysis) No additional analysis was used in this review.  
7

## 8 **Results**

### 9 **Guidance selection**

10 We retrieved 3370 citations from MEDLINE and 23 additional citations from the guideline  
11 development organization websites, the International Journal for Equity in Health and emailing  
12 guideline development organizations. After removing duplicates and reviewing titles and abstracts,  
13 3368 citations were excluded. By reviewing reference lists of the remaining 23 full-text articles,  
14 we obtained 12 relevant citations. In total, 35 potentially relevant full texts were screened, out of  
15 which 25 full-texts were excluded. The main reason for exclusion was that the focus of the papers  
16 was not on methods for addressing equity in CPGs. Finally, 8 studies with 10 publications  
17 [19-21,26-32] were included in this review (Figure 1: Selection process of included studies).  
18

### 19 **Study characteristics**

20 Six studies [19-21,26,27,31] were retrieved from Medline, and four [28-30,32] were identified from  
21 guideline development organizations' websites. Only three studies [19,21,26] defined equity issues  
22 according to different definitions [2,33,34]. Included studies focused on different methodological  
23 topics related to equity including why [19], when [26], what [26] and how [19,20,26-32] CPG developers  
24 should address equity issues in CPGs, and how to assess the quality of CPGs, including equity, [21]  
25 for CPG users. Five studies (from 7 publications) [19,20,27-30,32] did not provide details of financial  
26 support. The characteristics of the included studies are provided in the Table 1.  
27

28 In terms of relevant information extracted and analyzed, Keuken DG (2007) [31] provided  
29 "Recommendation for focusing on sex-related factors in guideline development"; NICE (2012)  
30 [28,29] provided "The protected characteristics", "Equality in guideline development", a "Checklist  
31 for scoping", a "Checklist for early guideline development" and a "Checklist for formulating  
32 recommendations"; Dans AM (2007) [21] provided "The equity lens" to assess the quality of  
33 guidelines including equity issues; targeting at on the WHO guidelines mainly, Oxman AD (2006)  
34 [26] reviewed related articles to provide guidance to address equity in guidelines;  
35 Eslava-Schmalbach J (2011) [19] described why equity issues should be addressed in guidelines;  
36 Acosta N (2011) [27] provided simple guidance for including equity in guidelines; Aldrich (2003)  
37 [20] and NHMRC (2002) [30] provided indicators and search terms for socioeconomic factors and a  
38 framework for using evidence on socioeconomic factors in the development of clinical practice  
39 guidelines; rather than focusing on equity issues in particular, the WHO (2012) [32] provided  
40 advice on equity issues in its "PICO question components" and "evidence retrieval and synthesis"  
41 sections.  
42

### 43 **Synthesis of results**

44 In total, 87 questions/items were collected. After content analysis, eight themes (seven for CPG  
45 developers, one for CPG users) were identified as following (see Appendix 3 Content analysis of  
46 the individual study). Then based on them, we outlined an integrated CPG development process  
47 for developers, including seven steps in total (see Figure 2 Overview of clinical practice  
48 guidelines development process (for CPG developers)).  
49

### 50 **For CPG developers:**

#### 51 **Scoping questions**



1  
2  
3 Seven studies <sup>[19,20,26-32]</sup> reported the development of CPGs should include “Scoping questions” by  
4 which CPG developers could consider the reasons for addressing equity in their CPG (i.e.  
5 differential effectiveness across groups, negative impact of guideline without equity  
6 considerations, and improving overall effectiveness of guideline within equity) <sup>[19]</sup>, the scenario  
7 and timing when equity should be addressed (example.g. the presence of differential effects across  
8 groups) <sup>[26]</sup>, targeted populations, social determinants of health specified by PROGRESS or  
9 PROGRESS-Plus frameworks <sup>[6,7]</sup>, and the changes and comments from stakeholders for the  
10 proposed question <sup>[28,29]</sup>.

### 11 **Searching relevant evidence**

12 Four of the included studies <sup>[20,28-32]</sup> (six publications) described the ‘Searching relevant evidence’  
13 theme, including appropriate study designs, changing search strategies when necessary, using  
14 terms/markers for equity, and appraising the eligibility criteria.

### 15 **Appraising evidence and recommendations**

16 Five studies <sup>[20,26-31]</sup> with seven publications fulfilled the “Appraising evidence and  
17 recommendations” theme, including the appraisal of scientific evidence, such as the appraisal of  
18 appropriate modifiers, study design, sample size, analysis methods, the applicability and relevance  
19 of evidence, influence of equity evidences, the quality of evidence, the necessity of evidence and  
20 making changes and evidence gaps, as well as the appraisal of recommendations, such as the  
21 relevance of recommendations, the impact of recommendations and the quality of development  
22 process.

### 23 **Formulating recommendations**

24 Three studies <sup>[20,28-31]</sup> with five publications provided guidance for how CPG developers should  
25 formulate recommendations to address equity issues as well as the elements that should be  
26 considered when synthesizing the evidence and formulating recommendations, including  
27 analyzing different subgroup effects, listing different/inconsistent evidence, balancing harms and  
28 benefits for disadvantaged populations, formulating equitable recommendations (such as  
29 considering barriers and facilitators of interventions for disadvantaged populations, and mitigating  
30 negative effects that may produce inequities during the formulation of recommendations), and  
31 how to advance recommendations and adjust recommendations.

### 32 **Monitoring implementation**

33 Four studies <sup>[20,26,27,30,31]</sup> with five publications described the “Monitoring implementation” theme.  
34 These studies included guidance on what should be considered during the implementation of  
35 CPGs and how to monitor implementation. Guidance suggested that CPG developers should  
36 minimize barriers to implementation, inform adaptation and decision-making in some specific  
37 settings, develop an equitable implementation strategy, change the organizational structure, and  
38 monitor the effects of implementation. When no evidence is available, CPG developers should  
39 change search strategies, scope of the questions, and promotion strategies.

### 40 **Providing a flow chart to include equity in CPGs**

41 Four studies <sup>[19,20,28-31]</sup> were included in the “Providing a flow chart to include equity in CPGs”  
42 theme. These included following common steps: identifying questions, developing search  
43 strategies, appraising scientific evidence, synthesizing the evidence, formulating recommendations  
44 and writing the guideline documents. Almost all of the elements in this theme were captured by  
45 the other themes except “Synthesizing the evidence”. This additional element suggests that CPG  
46 developers should analyze subgroup effects, describe different/inconsistent evidence, balance  
47  
48  
49  
50  
51  
52  
53  
54  
55  
56  
57  
58  
59  
60

1  
2  
3 harms and benefits, and consult comments from stakeholders.

#### 4 **Others: reporting of guidelines and comments from stakeholders**

5 Keuken DG (2007) <sup>[31]</sup> reported the knowledge needs for the various ways of reporting guidelines.  
6 The authors stated that CPGs developers should balance advantages and disadvantages of different  
7 reporting methods. NICE (2012) <sup>[28,29]</sup> highlighted the need for engagement with stakeholders  
8 during every stage of the development process.  
9

#### 10 **For the CPGs users:**

##### 11 **Assessing the quality of CPGs**

12 Dans AM (2007) <sup>[21]</sup> reported how CPG users can assess the quality of CPGs. This study includes  
13 limited guidance, including whether recommendations considered priorities for disadvantaged  
14 populations, and factors to explore differential effects across groups during the scoping stage. The  
15 authors suggest CPG users assess whether differential effects of the intervention across groups are  
16 valued, consider these when implementing the recommendations in practice, and address barriers  
17 to implementation, and the impact of the recommendations.  
18

#### 19 **Discussion**

##### 20 **Summary of evidence**

21 We identified eight studies with 10 publications focusing on how to address equity issues in  
22 guidelines. Using different definitions of health equity the eight guiding studies may result in the  
23 difference of identifying the same conditions related to equity. Few studies provided  
24 methodological guidance to help CPG users identify important information on equity. After  
25 qualitative analysis, eight themes were identified, which included “scoping questions”, “searching  
26 relevant evidence”, “appraising evidence”, “formulating recommendations”, “monitoring  
27 implementation” , “providing a flow chart to include equity in CPGs”, and “others: reporting of  
28 guidelines and comments from stakeholders” for CPG developers and “assessing the quality of  
29 CPGs” for CPG users. Most of the included studies provided CPG developers or users with  
30 open-ended questions in checklists/frameworks rather than with a tool (with examples) to judge  
31 why, what, when, and how equity issues should be addressed. Few guidance publications  
32 described how to assess the quality of CPGs which considered equity issues in their  
33 recommendations, the process for developing CPGs, or how to report equity considerations.  
34 NHMRC (2003) <sup>[30]</sup>, Keuken DG (2007) <sup>[31]</sup>, Aldrich R (2003) <sup>[20]</sup> and NICE (2012) <sup>[28,29]</sup> covered  
35 more than five themes.  
36

37 All included studies reported the “scoping questions” theme. When a guideline is developed, a  
38 rationale for equity considerations should be described based on the differential effectiveness of  
39 interventions between subgroups. The PROGRESS and PROGRESS-Plus acronyms are  
40 recommended for identifying potentially disadvantaged groups when describing the scope of the  
41 CPG <sup>[6]</sup>. Four studies <sup>[20,28-32]</sup> described the “searching relevant evidence” theme, but, only NICE  
42 (2012) <sup>[28,29]</sup> suggested the consideration of study design. NHMRC (2003) <sup>[30]</sup> & Aldrich R (2003)  
43 <sup>[20]</sup> provided search terms on equity issues. Identifying evidence including systematic reviews,  
44 clinical practice guidelines, randomized controlled trials and supplementary literature is essential  
45 for CPG development. The search strategy must be transparent and reproducible. The reporting of  
46 databases, time periods, key words, subject headings, language restrictions, gray literature, and  
47 eligibility criteria should be considered <sup>[35]</sup>.  
48

49 Before formulating recommendations, the quality of scientific evidence must be appraised by  
50 appropriate appraisal tools. The relevance, applicability, impact of evidence on equity and  
51  
52  
53  
54  
55  
56  
57  
58  
59  
60



1  
2  
3 evidence gaps should be assessed. Equity-specific CPG developers should focus on important  
4 questions, for example whether CPGs gave priority to the disadvantaged, how the applicability of  
5 the CPG and its evidence for disadvantaged populations was assessed, and whether  
6 implementation and monitoring strategies will detect effects for the most disadvantaged [36]. When  
7 evidence gaps exist, expert opinion or consensus is necessary to allow CPG developers to  
8 highlight future research needs [35]. NHMRC (2003) [30] & Aldrich R (2003) [20] provide strategies  
9 that can be used when there is a lack of evidence. For specific population subgroups, guideline  
10 developers should counterpoise harms and benefits of interventions, consider barriers and  
11 facilitators of interventions, and adjust recommendations for specific settings. Only Dans AM  
12 (2007) provided an equity lens to appraise the quality of a CPG with equity considerations. For the  
13 development of a CPG, we suggest that a well-designed handbook such as the “WHO handbook  
14 for guideline development” [32], “SIGN 50 A guideline developer’s handbook” [37], “Handbook on  
15 Clinical Practice Guidelines” [38] or NICE “the guidelines manual 2012” [28] is utilized. The  
16 process of CPG development (Figure 2) outlined in this paper will be more effective when used in  
17 combination with the handbooks mentioned above.

### 22 Limitations

23 With the comprehensive search strategy, only 8 studies (containing 87 questions or items) were  
24 included in this review. However, compared to previous reviews [27], our study includes a wider  
25 collection of handbooks and guidance documents. Although Acosta N (2011) included 20 studies  
26 (of which only three [21,26,30] were included in our review), [27] the authors only discussed equity in  
27 the development of CPGs with a narrative literature review. We extracted the methodological  
28 checklists/frameworks from the eligible studies and conducted content analysis. Content analysis  
29 was used because of its methodological characteristics and reliable measures to achieve  
30 trustworthiness [39]. However, a limitation of content analysis is that the likelihood of replicability  
31 for the analysis procedure is low [25].

### 34 Conclusions

35 By reviewing the existing guidance documents and guidelines, eight themes (i.e. “scoping  
36 questions”, “searching relevant evidence”, “appraising evidence and recommendations”,  
37 “formulating recommendations”, “monitoring implementation”, “providing a flow chart to include  
38 equity in CPGs”, and “others: reporting of guidelines and comments from stakeholders” for CPGs  
39 developers and “assessing the quality of CPGs” for CPGs users) were identified for guiding the  
40 incorporation of equity issues into clinical practice guidelines. Among existing checklists, Keuken  
41 DG (2007) [31] and NHMRC (2003) [30] covered most of these themes and have the greatest  
42 potential to be used as a tool for guiding equity considerations in guidelines. No grading systems  
43 or scoring criteria were found from existing checklists.

44  
45  
46  
47  
48 **Funding:** No financial support.

49 **Conflict of interest:** None.

50 This abstract was accepted as an oral presentation in 21<sup>st</sup> Cochrane Colloquium in Canada on  
51 Monday, 23 September 2013.

### 53 Contributorship:

- 54 1) Conceiving and designing this review: Chunhu SHI, Jinhui TIAN and Kehu YANG,  
55 2) Searching, extracting data and analyzing the data: Chunhu SHI, Quan WANG and  
56 Kehu YANG,  
57  
58  
59  
60

- 3) Writing, amending and revising manuscript: Chunhu SHI, Jinhui TIAN, Dan REN, Jennifer Petkovic and Yang Yang
- 4) When disagreements happened, discussing with Kehu YANG and Jinhui TIAN.
- 5) Final approval of manuscript: Chunhu SHI, Jinhui TIAN, Quan WANG, Dan REN, Jennifer Petkovic, Kehu YANG and Yang Yang
- 6) Important comments and English editing: Jennifer Petkovic and Yang Yang

**Data sharing:** No additional data available.

## FIGURE LEGENDS

**Figure 1 Selection process of included studies**

**Figure 2 Overview of clinical practice guidelines development process (for CPGs developers)**

## References

1. World Health Organization. (1947) The constitution of the World Health Organization, in World Health Organization Chronicles.
2. Whitehead M. (1992) The concepts and principles of equity in health. *Int J Health Serv* 22:429-445.
3. Ministry of Health, Reducing Inequalities in Health. 2002, Ministry of Health: Wellington.
4. World Health Organization. Health Systems: Equity. Available from: <http://www.who.int/healthsystems/topics/equity/en>. Accessed 25 September 2013.
5. CSDH (2008). Closing the gap in a generation: health equity through action on the social determinants of health. Final Report of the Commission on Social Determinants of Health. Geneva, World Health Organization.
6. O'Neill J, Tabish H, Welch V, et al. (2014) Applying an equity lens to interventions: using PROGRESS ensures consideration of socially stratifying factors to illuminate inequities in health. *J Clin Epidemiol.* 67(1):56-64.
7. Oliver S, Dickson K, Newman M. (2012) Getting started with a review. In: Gough D, Oliver S, Thomas J, editors. *An introduction to systematic reviews*. London, UK: SAGE Publications.
8. Long JA, Chang VW, Ibrahim SA, Asch DA. (2004) Update on the health disparities literature. *Ann Intern Med.* 141(10):805-812.
9. Vogel TR. (2012) Update and review of racial disparities in sepsis. *Surg Infect (Larchmt).* 13(4):203-208.
10. Wallace R, Huang Y, Gould P, Wallace D. (1997) The hierarchical diffusion of AIDS and violent crime among US metropolitan regions: innercity decay, stochastic resonance and reversal of the mortality transition. *Soc Sci Med* 44:935-947.
11. Wallace R, Wallace D. (1997) Socioeconomic determinants of health: community marginalisation and the diffusion of disease and disorder in the United States. *BMJ.* 314(7090):1341-1345.
12. Murray CJ, Vos T, Lozano R, et al. (2012) Disability-adjusted life years (DALYs) for 291 diseases and injuries in 21 regions, 1990-2010: a systematic analysis for the Global Burden of Disease Study 2010. *Lancet.* 380(9859):2197-2223.
13. Lozano R, Naghavi M, Foreman K, et al. (2012) Global and regional mortality from 235

- causes of death for 20 age groups in 1990 and 2010: a systematic analysis for the Global Burden of Disease Study 2010. *Lancet*. 380(9859):2095-2128.
14. Wang H, Dwyer-Lindgren L, Lofgren KT, et al. (2012) Age-specific and sex-specific mortality in 187 countries, 1970-2010: a systematic analysis for the Global Burden of Disease Study 2010. *Lancet*. 380(9859):2071-2094.
  15. IOM (Institute of Medicine). 2011. *Clinical Practice Guidelines We Can Trust*. Washington, DC: The National Academies Press.
  16. Woolf SH, Grol R, Hutchinson A, Eccles M, Grimshaw J. (1999) Potential benefits, limitations, and harms of clinical guidelines. *BMJ*. 318:527.
  17. Shekelle PG, Woolf SH, Eccles M, Grimshaw J. (1999) Clinical guidelines: developing guidelines. *BMJ*. 318(7183):593-596.
  18. McFarlane P. (2006) Not all guidelines are created equal. *CMAJ*. 174(6):814; discussion 815.
  19. Eslava-Schmalbach J, Sandoval-Vargas G, Mosquera P. (2011) Incorporating equity into developing and implementing for evidence-based clinical practice guidelines. *Rev Salud Publica (Bogota)*. 13(2):339-351.
  20. Aldrich R, Kemp L, Williams JS, Harris E, Simpson S, Wilson A, McGillK, Byles J, Lowe J, Jackson T. (2003) Using socioeconomic evidence in clinical practice guidelines. *BMJ* 327(7426):1283-1285.
  21. Dans AM, Dans L, Oxman AD, Robinson V, Acuin J, Tugwell P, Dennis R, Kang D. (2007) Assessing equity in clinical practice guidelines. *J Clin Epidemiol*. 60(6):540-546.
  22. Sassi F, Le Grand J, Archard L. (2001) Equity versus efficiency: a dilemma for the NHS. If the NHS is serious about equity it must offer guidance when principles conflict. *BMJ*. 323(7316):762-3.
  23. Burgers JS, Grol R, Klazinga NS, Makela M, Zaat J. (2003) Towards evidence-based clinical practice: An international survey of 18 clinical guideline programs. *Int J Quality Healthcare* 15:31.
  24. Haase A, Follmann M, Skipka G, Kirchner H. (2007) Developing search strategies for clinical practice guidelines in SUMSearch and Google Scholar and assessing their retrieval performance. *BMC Med Res Methodol*. 7:28.
  25. Krippendorff, K. *Content Analysis. (1980) An Introduction to its Methodology*. The Sage Commtext Series, Sage Publications Ltd., London.
  26. Oxman AD, Schünemann HJ, Fretheim A. (2006) Improving the use of research evidence in guideline development: 12. Incorporating considerations of equity. *Health Res Policy Syst*. 4:24.
  27. Acosta N, Pollard J, Mosquera P, Reveiz L. (2011) [The concept of equity when developing clinical practice guidelines]. [Article in Spanish] *Rev Salud Publica (Bogota)*. 13(2):327-338.
  28. The National Institute for Health and Clinical Excellence. *The guidelines manual 2012*. Available from <http://publications.nice.org.uk/the-guidelines-manual-pmg6> Accessed. 29 Oct. 2013.
  29. National Institute for Health and Clinical Excellence (November 2012) *Positively equal: A guide to addressing equality issues in developing NICE clinical guidelines (Second edition)*. London: National Institute for Health and Clinical Excellence. Available from: [www.nice.org.uk](http://www.nice.org.uk)
  30. National Health and Medical Research Council. *Using socioeconomic evidence in clinical*

- 1  
2  
3 practice guidelines. Canberra: NHMRC, 2003:95.  
4 [www.nhmrc.gov.au/publications/synopses/cp65syn.htm](http://www.nhmrc.gov.au/publications/synopses/cp65syn.htm) Accessed 20 Jan 2013.
- 5  
6 31. Keuken DG, Haafkens JA, Moerman CJ, Klazinga NS, ter Riet G. (2007) Attention to  
7 sex-related factors in the development of clinical practice guidelines. *J Womens Health*  
8 (Larchmt). 16(1):82-92.
- 9  
10 32. World Health Organization. (2012) WHO handbook for guideline development. WHO Press,  
11 Geneva, Switzerland. Available from: [www.who.int](http://www.who.int)
- 12  
13 33. Braveman PA, Gruskin S. (2003) Defining equity in health. *J Epidemiol Community Health*  
14 57:254e8.
- 15  
16 34. Casas-Zamora JA, Ibrahim SA. (2004) Confronting health inequity: the global dimension.  
17 *Am J Public Health*. 94(12):2055-2058.
- 18  
19 35. Rosenfeld RM, Shiffman RN, Robertson P. (2013) Clinical Practice Guideline Development  
20 Manual, Third Edition: a quality-driven approach for translating evidence into action.  
21 *Otolaryngol Head Neck Surg*. 148(1 Suppl):S1-55.
- 22  
23 36. Dans AL, Dans LF. (2010) Appraising a tool for guideline appraisal (the AGREE II  
24 instrument). *J Clin Epidemiol*. 63 (12) :1281-2.
- 25  
26 37. Scottish Intercollegiate Guidelines Network. SIGN 50 A guideline developer's handbook.  
27 Available from <http://www.sign.ac.uk/guidelines/fulltext/50/index.html> Accessed. 29 Oct.  
28 2013.
- 29  
30 38. Canadian Medical Association. Guidelines for Canadian clinical practice guidelines.  
31 Available from <http://mdm.ca/cpgsnew/cpgs/gccpg-e.htm>: Accessed. 29 Oct. 2013.
- 32  
33 39. Graneheim UH, Lundman B. (2004) Qualitative content analysis in nursing research:  
34 concepts, procedures and measures to achieve trustworthiness. *Nurse Educ Today*.  
35 24(2):105-112.
- 36  
37  
38  
39  
40  
41  
42  
43  
44  
45  
46  
47  
48  
49  
50  
51  
52  
53  
54  
55  
56  
57  
58  
59  
60

Table 1 Characteristics of the included studies

| Study                                                          | Journal/Sources                       | Publication type       | Definition of equity                       | Scope                               | Targeted users       | Funding                                                                 |
|----------------------------------------------------------------|---------------------------------------|------------------------|--------------------------------------------|-------------------------------------|----------------------|-------------------------------------------------------------------------|
| Eslava-Schmalbach J 2011 <sup>[19]</sup>                       | Rev. salud publica                    | Review                 | Casas-Zamora JA 2004,<br>Whitehead M. 1992 | Why,<br>How                         | CPGs<br>developers * | No declaration                                                          |
| Dans AM 2007 <sup>[21]</sup>                                   | Journal of Clinical<br>Epidemiology   | Article                | Braveman 2003,<br>Whitehead 1992           | Assessing<br>the quality<br>of CPGs | CPGs users           | Rockefeller Foundation,<br>Norwegian Health Services<br>Research Center |
| Oxman AD 2006 <sup>[26]</sup>                                  | Health Research<br>Policy and Systems | Review                 | Braveman 2003,<br>Whitehead 1992           | When,<br>What,<br>How               | CPGs<br>developers   | WHO,<br>Norwegian Knowledge Centre<br>for the Health Services           |
| Acosta N 2011 <sup>[27]</sup>                                  | Rev. salud publica                    | Review                 | None provided                              | How                                 | CPGs<br>developers   | No declaration                                                          |
| NICE 2012 <sup>[28]</sup> &<br>NICE 2012 <sup>[29]</sup>       | NICE                                  | Guideline              | None provided                              | How                                 | CPGs<br>developers   | No declaration                                                          |
| Aldrich R 2003 <sup>[20]</sup> &<br>NHMRC 2002 <sup>[30]</sup> | BMJ &<br>NHMRC                        | Article &<br>Guideline | None provided                              | How                                 | CPGs<br>developers   | No declaration                                                          |
| Keuken DG 2008 <sup>[31]</sup>                                 | Dissertation                          | Dissertation           | None provided                              | How                                 | CPGs<br>developers * | Netherlands Organization for<br>Health Research and<br>Development      |
| WHO 2012 <sup>[32]</sup>                                       | WHO                                   | Guideline              | None provided                              | How                                 | CPGs<br>developers   | No declaration                                                          |

Note: \* indicates that original studies did not report their targeted users by themselves and authors of this study specified them to be CPGs developers.

1  
2  
3  
4  
5  
6  
7  
8  
9  
10  
11  
12  
13  
14  
15  
16  
17  
18  
19  
20  
21  
22  
23  
24  
25  
26  
27  
28  
29  
30  
31  
32  
33  
34  
35  
36  
37  
38  
39  
40  
41  
42  
43  
44  
45  
46  
47  
48  
49  
50  
51  
52  
53  
54  
55  
56  
57  
58  
59  
60

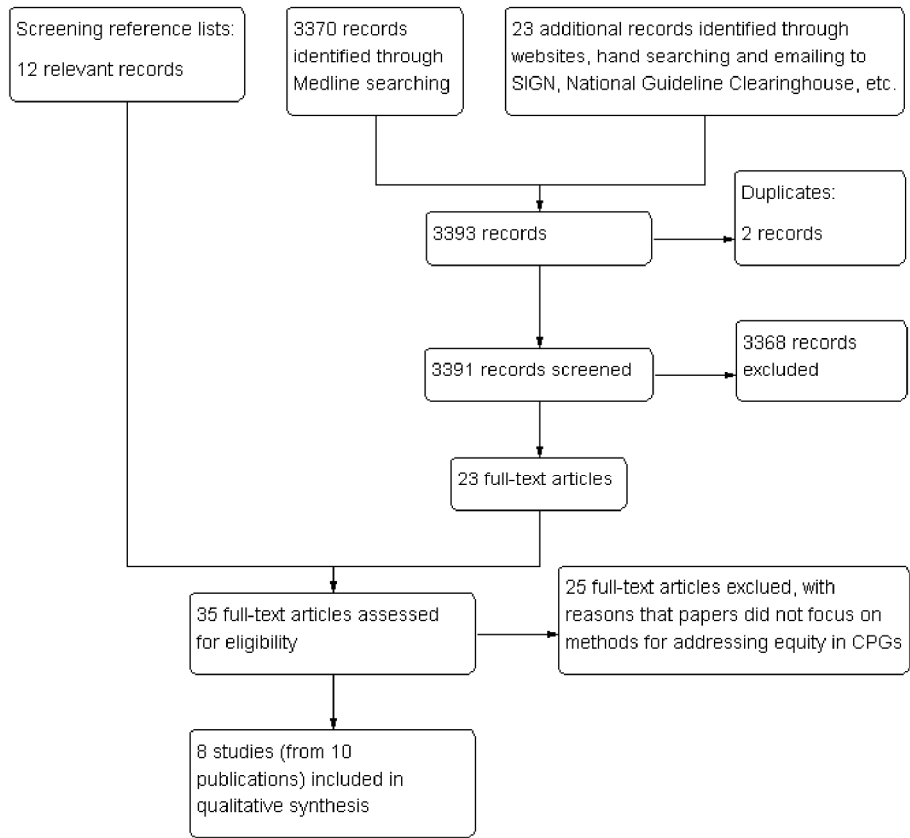

Figure 1 Selection process of included studies  
258x240mm (300 x 300 DPI)

only

1  
2  
3  
4  
5  
6  
7  
8  
9  
10  
11  
12  
13  
14  
15  
16  
17  
18  
19  
20  
21  
22  
23  
24  
25  
26  
27  
28  
29  
30  
31  
32  
33  
34  
35  
36  
37  
38  
39  
40  
41  
42  
43  
44  
45  
46  
47  
48  
49  
50  
51  
52  
53  
54  
55  
56  
57  
58  
59  
60

**Figure 2 Overview of clinical practice guidelines development process  
(for CPGs developers)**

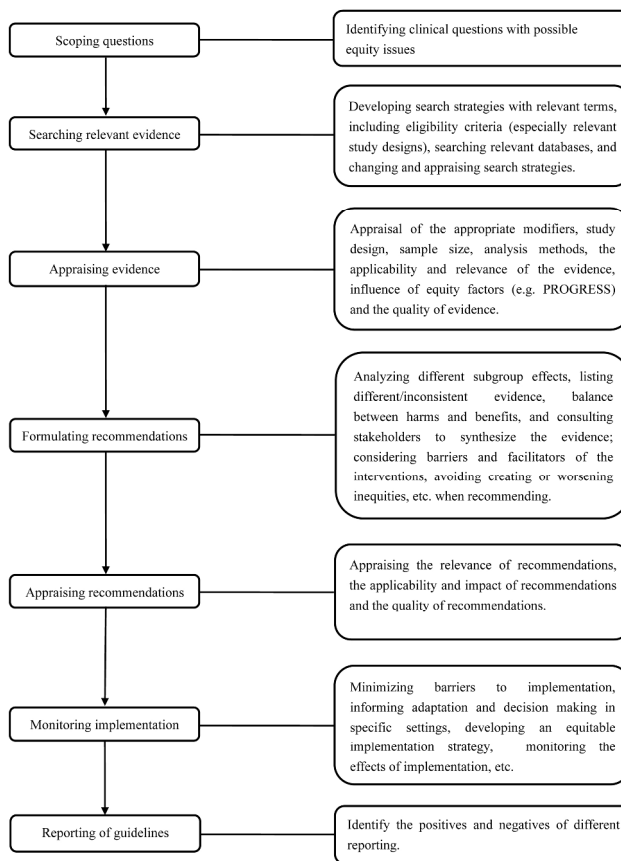

Figure 2 Overview of clinical practice guidelines development process (for CPGs developers)  
210x330mm (300 x 300 DPI)



## Appendix 1 Data extraction form

| ID                                                 |                                        | Answers          |
|----------------------------------------------------|----------------------------------------|------------------|
| Date                                               |                                        | __/__/__ (M/D/Y) |
| Reviewers                                          |                                        | _____            |
| Study details                                      |                                        | Descriptions     |
| Title                                              |                                        |                  |
| First author                                       |                                        |                  |
| Year of publication                                |                                        |                  |
| Journal's name                                     |                                        |                  |
| Information type                                   |                                        | Please specify:  |
|                                                    |                                        |                  |
|                                                    |                                        |                  |
| Checklists or frameworks, etc for content analysis |                                        |                  |
| No.                                                | Checklists items/frameworks components |                  |
| 1                                                  |                                        |                  |
| 2                                                  |                                        |                  |
| 3                                                  |                                        |                  |
| 4                                                  |                                        |                  |
| ...                                                |                                        |                  |
| ...                                                |                                        |                  |

## Appendix 2 The process of content analysis

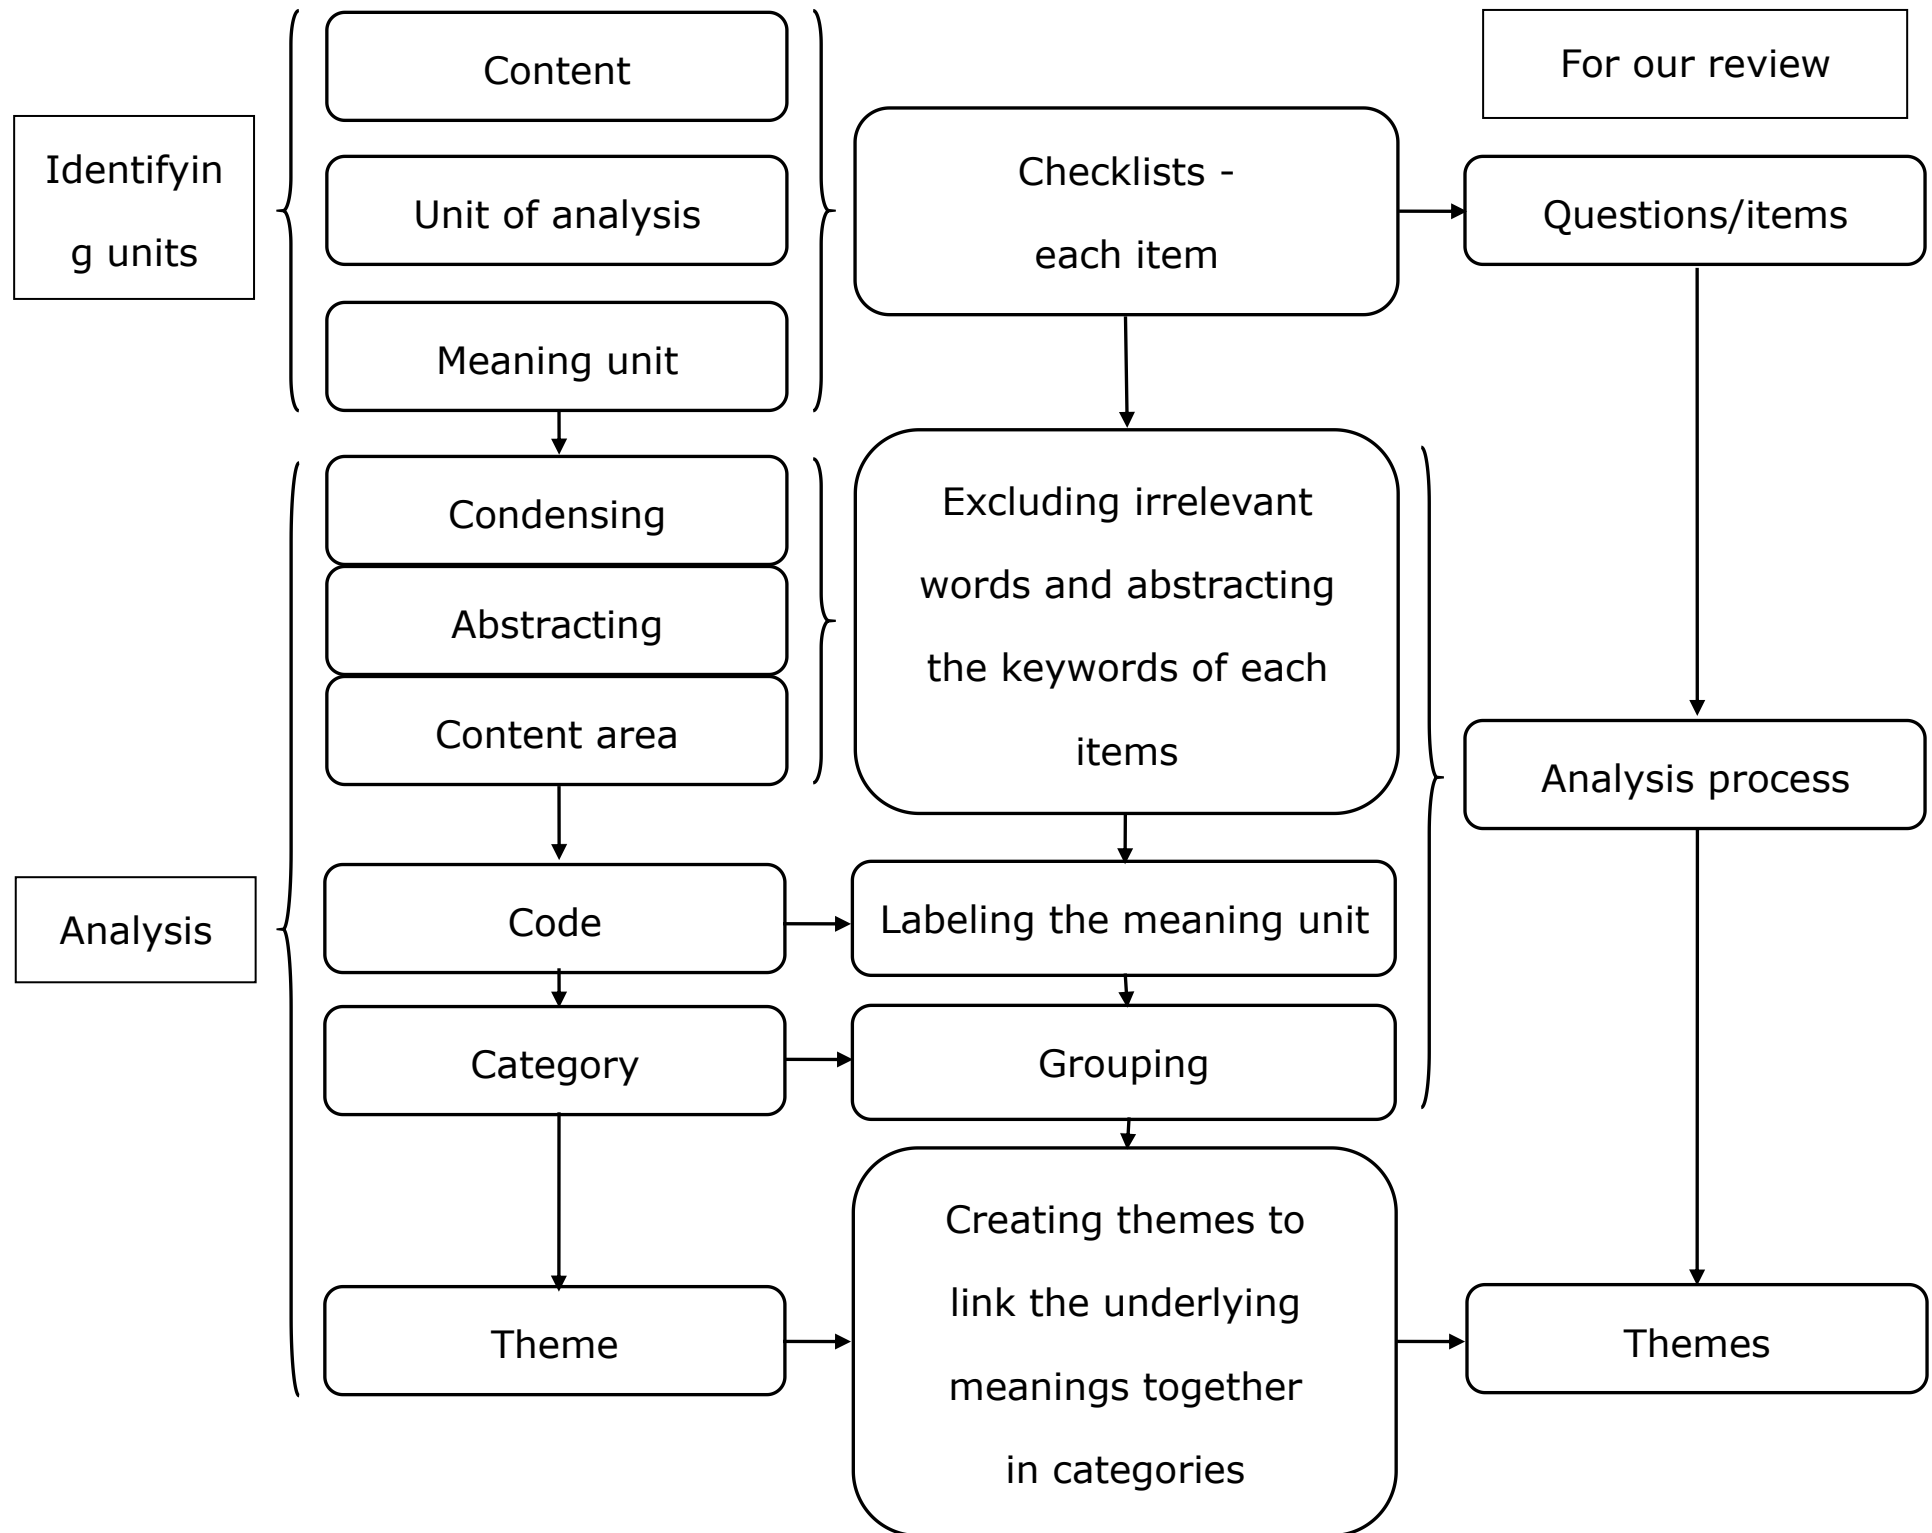

### Appendix 3 Content analysis of the individual study

| Eslava-Schmalbach J 2011 [16]                                                                                                                                       |                                                                 |                                                                 |                                         |  |
|---------------------------------------------------------------------------------------------------------------------------------------------------------------------|-----------------------------------------------------------------|-----------------------------------------------------------------|-----------------------------------------|--|
| Items                                                                                                                                                               | Categories                                                      | Coding                                                          | Themes                                  |  |
| 1. Differential effectiveness by social groups of interventions could diminish final effectiveness of CPG in the General Social Security and Health System (GSSHS); | The negative impact of differential effectiveness across groups | Reasons for addressing equity in guideline                      | Scoping questions                       |  |
| 2. To not consider geographical, ethnic, socioeconomic, cultural and access diversity issues within the CPG could have a potential negative impacts of the CPG;     | The negative impact regardless of equity issues                 | Why to address equity into guideline                            | Scoping questions                       |  |
| 3. Overall effectiveness of GPC could be better if equity issues are included in the quality verification checklist of the guideline questions;                     | Better effectiveness of guideline when equity is included       | Why to address equity into guideline                            | Scoping questions                       |  |
| 4. Incorporating equity issues in the process of developing CPG could be cost effective, because improve overall effectiveness of CPG.                              | Improving overall effectiveness of guideline                    | Why to address equity into guideline                            | Scoping questions                       |  |
| Note: This article discussed why equity issues should be addressed into guidelines                                                                                  |                                                                 |                                                                 |                                         |  |
| Dans AM 2007 [18]                                                                                                                                                   |                                                                 |                                                                 |                                         |  |
| Items                                                                                                                                                               | Categories                                                      | Coding                                                          | Themes                                  |  |
| 1. Do the public health recommendations in the guidelines address a priority problem for disadvantaged populations?                                                 | Priorities for disadvantaged populations                        | Equity issues                                                   | Scoping questions                       |  |
| 2. Is there a reason to anticipate different effects of intervention in disadvantaged and privileged populations?                                                   | Factors to explore differential effects across groups           | Equity issues                                                   | Scoping questions                       |  |
| 3. Are the effects of the intervention valued differently by disadvantaged compared with privileged populations?                                                    | Differential effects from evidences across groups               | Appraising recommendation, appraisal of the scientific evidence | Appraising evidence and recommendations |  |
| 4. Is specific attention given to minimizing barriers to implementation in disadvantaged populations?                                                               | Minimizing barriers to implementation                           | Implementation                                                  | Appraising implementation               |  |
| 5. Do plans for assessing the impact of the recommendations include disadvantaged populations?                                                                      | Assessing the impact of recommendations                         | Appraisal of recommendation                                     | Appraising evidence and recommendations |  |
| Note: This article provided a lens to assess the quality of guideline which addressed equity issues.                                                                |                                                                 |                                                                 |                                         |  |
| Oxman AD 2006 [22]                                                                                                                                                  |                                                                 |                                                                 |                                         |  |
| Items                                                                                                                                                               | Categories                                                      | Coding                                                          | Themes                                  |  |
| 1. When and how should inequities be addressed in systematic                                                                                                        | Differential effects across groups is indicated to              | When to address equity                                          | Scoping questions                       |  |

reviews that are used as background documents for recommendations? address equity

The following question should routinely be considered: are there plausible reasons for anticipating differential relative effects across disadvantaged and advantaged populations? If there are plausible reasons for anticipating differential effects, additional evidence should be included in a review to inform judgments about the likelihood of differential effects.

| 2. What questions about equity should routinely be addressed by those making recommendations on behalf of WHO? (the following additional questions should routinely be considered)                                                                                                                                                                                                                                                                                                                                                                                                   | Equity issues                                                                                                                             | Equity issues                                    | Scoping questions                                          |
|--------------------------------------------------------------------------------------------------------------------------------------------------------------------------------------------------------------------------------------------------------------------------------------------------------------------------------------------------------------------------------------------------------------------------------------------------------------------------------------------------------------------------------------------------------------------------------------|-------------------------------------------------------------------------------------------------------------------------------------------|--------------------------------------------------|------------------------------------------------------------|
| How likely is it that the results of available research are applicable to disadvantaged populations and settings?                                                                                                                                                                                                                                                                                                                                                                                                                                                                    | Assessing applicability of available evidence                                                                                             | Appraisal of scientific evidence                 | Appraising evidence and recommendations, scoping questions |
| How likely are differences in baseline risk that would result in differential absolute effects across disadvantaged and advantaged populations?                                                                                                                                                                                                                                                                                                                                                                                                                                      | Assessing effects of baseline risk across groups                                                                                          | appraisal the difference between groups          | Appraising evidence and recommendations, scoping questions |
| How likely is it that there are important differences in trade-offs between the expected benefits and harms across disadvantaged and advantaged populations?                                                                                                                                                                                                                                                                                                                                                                                                                         | Assessing the balance between benefits and harms across groups                                                                            | Appraisal the needs of evidences                 | Appraising evidence and recommendations, scoping questions |
| Are there different implications for disadvantaged and advantaged populations, or implications for addressing inequities?                                                                                                                                                                                                                                                                                                                                                                                                                                                            | Assessing the needs of evidence implications                                                                                              | Appraisal the needs of evidences                 | Appraising evidence and recommendations, scoping questions |
| 3. What context specific information is needed to inform adaptation and decision making in a specific setting with regard to impacts on equity?                                                                                                                                                                                                                                                                                                                                                                                                                                      | Informing adaptation and decision making                                                                                                  |                                                  |                                                            |
| Those making recommendations on behalf of WHO should routinely consider and offer advice about the importance of the following types of context specific data that might be needed to inform adaptation and decision making in a specific setting: Effect modifiers for disadvantaged populations and for the likelihood of differential effects; Baseline risk in relationship to social and economic status; Utilization and access to care in relationship to social and economic status; Costs in relationship to social and economic status; Ethics and laws that may impact on | Effect modifiers, baseline risk, access to interventions, costs, ethics and availability of resources should be used to inform adaptation | Implementation of guidelines in specific setting | Monitoring implementation                                  |

1  
2  
3  
4  
5  
6  
7  
8  
9  
10  
11  
12  
13  
14  
15  
16  
17  
18  
19  
20  
21  
22  
23  
24  
25  
26  
27  
28  
29  
30  
31  
32  
33  
34  
35  
36  
37  
38  
39  
40  
41  
42  
43  
44  
45  
46  
47  
48  
49  
50  
51  
52  
53  
54  
55  
56  
57  
58

|                                                                                                                                                                                                                                                                                                                                                                                                                                                                                                                                                                                                                                                                                                                                     |                                                                                                              |                |                           |
|-------------------------------------------------------------------------------------------------------------------------------------------------------------------------------------------------------------------------------------------------------------------------------------------------------------------------------------------------------------------------------------------------------------------------------------------------------------------------------------------------------------------------------------------------------------------------------------------------------------------------------------------------------------------------------------------------------------------------------------|--------------------------------------------------------------------------------------------------------------|----------------|---------------------------|
| strategies for addressing inequities; Availability of resources to address inequities.                                                                                                                                                                                                                                                                                                                                                                                                                                                                                                                                                                                                                                              |                                                                                                              |                |                           |
| 4. What implementation strategies are likely be needed to ensure that recommendations are implemented equitably?<br>Organizational changes are likely to be important to address inequities. While it may only be possible to consider these in relationship to specific settings, consideration should be given to how best to provide support for identifying and addressing needs for organizational changes. In countries with pervasive inequities institutional, cultural and political changes may first be needed.<br>Appropriate indicators of social and economic status should be used to monitor the effects of implementing recommendations on disadvantaged populations and on changes in social and economic status. | Equitable implementation strategy<br><br>Organizational changes<br><br>Monitor the effects of implementation | Implementation | Monitoring implementation |
| 5. What 'maps' are available of the different dimensions of inequity locally?                                                                                                                                                                                                                                                                                                                                                                                                                                                                                                                                                                                                                                                       | Appraisal of local setting inequities                                                                        | Implementation | Monitoring implementation |
| Note                                                                                                                                                                                                                                                                                                                                                                                                                                                                                                                                                                                                                                                                                                                                |                                                                                                              |                |                           |

|                                                                                                                                                                  |                                                              |                                                 |                                              |
|------------------------------------------------------------------------------------------------------------------------------------------------------------------|--------------------------------------------------------------|-------------------------------------------------|----------------------------------------------|
| Acosta N 2011 [23]                                                                                                                                               |                                                              |                                                 |                                              |
| Items                                                                                                                                                            | Categories                                                   | Coding                                          | Themes                                       |
| 1. Target population involvement during all phases of designing, implementing and evaluating CPG;                                                                | Equity is necessary to all phases of the development process | Appraisal of the quality of development process | Appraising evidence and recommendations      |
| 2. “Cultural capacity” seen as being necessary in CPGs’ “cultural translation” for interventions to have less disparity regarding their application and results; | Cultural capacity is necessary for guideline                 | Equity issues                                   | Scoping questions                            |
| 3. Considering psycho-social factors which could affect implementing CPG;                                                                                        | Psycho-social factors, facilitators of implementation        | Equity issues, implementation                   | Scoping questions, monitoring implementation |
| 4. Considering system inequities so that any health intervention would also confront risks and obstacles to health care due to socioeconomic status.             | Socioeconomic status                                         | Equity issues                                   | Scoping questions                            |
| Note                                                                                                                                                             |                                                              |                                                 |                                              |

|                    |            |        |        |
|--------------------|------------|--------|--------|
| NICE 2012 [24, 25] |            |        |        |
| Items              | Categories | Coding | Themes |

### The protected characteristics; Equality in guideline development

|                                                                                                                                                                                                            |                                             |               |                   |
|------------------------------------------------------------------------------------------------------------------------------------------------------------------------------------------------------------|---------------------------------------------|---------------|-------------------|
| The protected characteristics are: age, disability, gender reassignment, pregnancy and maternity, race, religion or belief, sex, sexual orientation, marriage and civil partnership, socio-economic, other | Population characteristics on equity issues | Equity issues | Scoping questions |
|------------------------------------------------------------------------------------------------------------------------------------------------------------------------------------------------------------|---------------------------------------------|---------------|-------------------|

### Checklist for scoping

|                                                                                                                                                                                                                                                                                                                                                                                                                      |                                                                                                                                                                                         |                                      |                                                       |
|----------------------------------------------------------------------------------------------------------------------------------------------------------------------------------------------------------------------------------------------------------------------------------------------------------------------------------------------------------------------------------------------------------------------|-----------------------------------------------------------------------------------------------------------------------------------------------------------------------------------------|--------------------------------------|-------------------------------------------------------|
| 1. What are the potential equality or discrimination issues linked to the guideline topic?                                                                                                                                                                                                                                                                                                                           | Equity issues                                                                                                                                                                           | Equity issues                        | Scoping questions                                     |
| Are there inequalities in prevalence, risk factors or impact - or in use or benefit - related to the topic or intervention?                                                                                                                                                                                                                                                                                          | Equity in prevalence or risk factors                                                                                                                                                    | Equity issues                        | Scoping questions                                     |
| Is the condition more common, or is its severity greater, in people from a specific group or with a particular disability?                                                                                                                                                                                                                                                                                           | Prevalence of equity condition                                                                                                                                                          | Equity issues                        | Scoping questions                                     |
| Is there a risk of discrimination?                                                                                                                                                                                                                                                                                                                                                                                   | Equitable scoping                                                                                                                                                                       | Equitable scoping                    | Scoping questions                                     |
| Do comments from stakeholders highlight the potential for direct or indirect discrimination, or for promoting equality?                                                                                                                                                                                                                                                                                              | Comments on equity issues                                                                                                                                                               | Comments for scoping                 | Scoping questions, others: comments from stakeholders |
| 2. Should any changes be made to the scope?<br>Consider the degree of relevance to equality, and the proportionate response in relation to this. The greater the relevance of a function to equality, the greater the regard that should be paid to equality issues.<br>Consider the views of stakeholders.<br>Summarize any changes made at this stage.<br>Identify any information gaps that have been identified. | Considering factors on changes in scope<br>Considering relevance of equity to change scope<br><br>Considering comments from stakeholders<br>Summarize changes<br>Identify evidence gaps | Changes on scope                     | Scoping questions, others: comments from stakeholders |
| 3. As it currently stands, is the scope discriminatory?<br>Have groups who need special consideration been identified?<br>Are there any exclusions?<br>If there are exclusions, are the reasons legitimate, and is the exclusion proportionate?                                                                                                                                                                      | Considering some factors on scoping<br>Identify potential special groups<br><br>Exclusion criteria<br>Equitable and appropriate exclusion                                               | Equitable scoping                    | Scoping questions                                     |
| 4. Should any further information be identified and assessed?<br>Have important stakeholders been omitted from or not responded to the consultation process?<br>Consider specific questions for stakeholders (for example, at the scoping workshop).<br>Summarize the action to be taken.                                                                                                                            | Identifying and assessing further information<br><br>Consulting stakeholders' comments<br>Consulting stakeholders' comments<br>Taking action                                            | Consulting comments in scoping stage | Scoping questions, others: comments from stakeholders |

|                                                       |                                                                                                                                                                                                                                                                                                                                                  |                                                                                                                                              |                                                           |                                                                      |
|-------------------------------------------------------|--------------------------------------------------------------------------------------------------------------------------------------------------------------------------------------------------------------------------------------------------------------------------------------------------------------------------------------------------|----------------------------------------------------------------------------------------------------------------------------------------------|-----------------------------------------------------------|----------------------------------------------------------------------|
| 1<br>2<br>3<br>4<br>5<br>6<br>7<br>8<br>9<br>10<br>11 | 5. Is there anything specific that should be done to ensure that the guideline development group (GDG) will have relevant information to consider equalities issues when developing guidance?<br>Action to address this needs only to be proportionate.<br>Consider specific questions for stakeholders.<br>Consider relevant bodies to consult. | Considering other specific questions<br><br>Appropriate action<br>Consider specific questions for stakeholders<br>Consulting relevant bodies | Specific questions in scoping stage                       | Scoping questions, others: comments from stakeholders                |
| 12                                                    | <b>Checklist for early guideline development</b>                                                                                                                                                                                                                                                                                                 |                                                                                                                                              |                                                           |                                                                      |
| 13<br>14<br>15<br>16<br>17                            | 1. How relevant is the evidence to eliminating discrimination, advancing equality and fostering good relations?                                                                                                                                                                                                                                  | Relevance of evidence                                                                                                                        | Appraisal of scientific evidence                          | Appraising evidence and recommendations                              |
| 18<br>19                                              | 2. Do the review questions reflect the scope?<br>Do they identify issues affecting specific groups?                                                                                                                                                                                                                                              | Effectiveness of clinical questions                                                                                                          | Appraisal of effects on scoping                           | Appraising evidence and recommendations                              |
| 20<br>21<br>22<br>23<br>24<br>25                      | 3. Was the search strategy comprehensive?<br>Consider a range of study of types for addressing the review questions (such as qualitative studies).                                                                                                                                                                                               | Comprehensive search strategy (appropriate study design)                                                                                     | Appraisal of search strategy                              | Appraising evidence and recommendations, searching relevant evidence |
| 26<br>27<br>28<br>29<br>30                            | 4. Were particular issues identified during consultation on the scope?<br>Consider amending the search strategy in the light of comments.                                                                                                                                                                                                        | Considering comments to change search strategy to collect necessary evidence                                                                 | Appraisal of the necessary on evidence and making changes | Appraising evidence and recommendations                              |
| 31<br>32<br>33<br>34<br>35<br>36                      | 5. Were the evidence review criteria inclusive?<br>Check that criteria do not inappropriately exclude studies on specific groups.                                                                                                                                                                                                                | Appropriate and inclusive criteria of eligibility studies                                                                                    | Appraisal of eligible criteria                            | Appraising evidence and recommendations, searching relevant evidence |
| 37<br>38<br>39                                        | 6. What is the state of the evidence base?<br>Where are the evidence gaps?                                                                                                                                                                                                                                                                       | Evidence gaps and evidence state                                                                                                             | Appraisal of evidence gaps                                | Appraising evidence and recommendations                              |
| 40                                                    | <b>Checklist for formulating recommendations</b>                                                                                                                                                                                                                                                                                                 |                                                                                                                                              |                                                           |                                                                      |
| 41                                                    | <b>General questions</b>                                                                                                                                                                                                                                                                                                                         |                                                                                                                                              |                                                           |                                                                      |
| 42<br>43<br>44<br>45                                  | 1. How relevant are the recommendations to discrimination and equality? Which recommendations are likely to be most relevant?                                                                                                                                                                                                                    | Relevance of recommendations to equity                                                                                                       | Appraisal the relevance of recommendations                | Appraising evidence and recommendations                              |
| 46<br>47<br>48<br>49                                  | 2. Where evidence is unavailable to assess a potential issue, could this be reflected in recommendations for future research?                                                                                                                                                                                                                    | Addressing the case where evidence is unavailable                                                                                            | Appraisal of evidence gaps                                | Appraising evidence and recommendations                              |
| 50                                                    | <b>Questions to consider to avoid discrimination include:</b>                                                                                                                                                                                                                                                                                    |                                                                                                                                              |                                                           |                                                                      |
| 51<br>52<br>53<br>54<br>55<br>56<br>57<br>58          | Summarizing the following questions:                                                                                                                                                                                                                                                                                                             | Access of interventions, barriers and facilitators                                                                                           | Formulating equitable                                     | Formulating                                                          |



|                                                                                                                                                                                                                                                                                                                                                                                                                                          |                                                                                                            |                                         |                                                                                                  |
|------------------------------------------------------------------------------------------------------------------------------------------------------------------------------------------------------------------------------------------------------------------------------------------------------------------------------------------------------------------------------------------------------------------------------------------|------------------------------------------------------------------------------------------------------------|-----------------------------------------|--------------------------------------------------------------------------------------------------|
|                                                                                                                                                                                                                                                                                                                                                                                                                                          | of interventions, and appraisal of the access to avoid inequity during formulating recommendations         | recommendations                         | recommendations, others: comments from stakeholders                                              |
| 1. Does access to the intervention depend on membership of a specific group?                                                                                                                                                                                                                                                                                                                                                             | Access to the intervention and specific group                                                              |                                         |                                                                                                  |
| 2. Do any criteria make it easier or more difficult in practice for people in a specific group to gain access to the intervention?                                                                                                                                                                                                                                                                                                       | Barriers and facilitators of the access of interventions                                                   |                                         |                                                                                                  |
| 3. Does the way in which people would be assessed for whether or not they receive the intervention make it easier or more difficult for people in a specific group to gain access to it?                                                                                                                                                                                                                                                 | Assessing the barriers and facilitators of the access of interventions                                     |                                         |                                                                                                  |
| 4. Does any part of the recommendation make it plausible that a person's age, disability, gender reassignment, pregnancy and maternity, marriage or civil partnership, race (including ethnic or national origins, color or nationality), religion or belief (including lack of belief), sex, sexual orientation or socioeconomic status could affect their access to an intervention? If so, what steps could be taken to address this? | Effects of equity on access to interventions                                                               |                                         |                                                                                                  |
| 5. Does any recommendation refer to age? If so, is age a good indicator of either risk or benefit from treatment and is the reason for the reference explained?                                                                                                                                                                                                                                                                          | Effects of age on recommendations                                                                          |                                         |                                                                                                  |
| 6. Do comments from stakeholders highlight areas of possible discrimination or ways of avoiding it?                                                                                                                                                                                                                                                                                                                                      | Comments                                                                                                   |                                         |                                                                                                  |
| <b>Questions to consider to advance equality of opportunity include:</b>                                                                                                                                                                                                                                                                                                                                                                 |                                                                                                            |                                         |                                                                                                  |
| Summarizing the following questions:                                                                                                                                                                                                                                                                                                                                                                                                     | Assessing and advancing the effectiveness and availability of recommendations, and access to interventions | Appraisal and advancing recommendations | Appraising evidence and recommendations, formulating recommendations, comments from stakeholders |
| 1. Could the recommendations advance equality for people in a specific group, either through access to the intervention or by means of the intervention? Have stakeholders identified particular opportunities?                                                                                                                                                                                                                          | Advancing equity                                                                                           |                                         |                                                                                                  |
| 2. Could the recommendations be reformulated to make                                                                                                                                                                                                                                                                                                                                                                                     | Change of recommendations                                                                                  |                                         |                                                                                                  |

1  
2  
3  
4  
5  
6  
7  
8  
9  
10  
11  
12  
13  
14  
15  
16  
17  
18  
19  
20  
21  
22  
23  
24  
25  
26  
27  
28  
29  
30  
31  
32  
33  
34  
35  
36  
37  
38  
39  
40  
41  
42  
43  
44  
45  
46  
47  
48  
49  
50  
51  
52  
53  
54  
55  
56  
57  
58

implementation more acceptable to, or appropriate for, people in a specific group?

3. Would more favorable treatment of any kind help disabled people to gain access to the intervention on the same basis as people without that disability? What additional measures would achieve this?

Equitable access to interventions

4. Do comments from stakeholders highlight opportunities for advancing equality?

Comments

**Questions to consider to foster good relations include:**

|                                                                                                        |                                                 |                           |                              |
|--------------------------------------------------------------------------------------------------------|-------------------------------------------------|---------------------------|------------------------------|
| 1. Is there an opportunity to tackle prejudice?                                                        |                                                 |                           | Formulating recommendations, |
| 2. Is there an opportunity to promote understanding?                                                   |                                                 | Adjusting recommendations | comments from stakeholders   |
| 3. Do comments from stakeholders highlight the need for tackling prejudice or promoting understanding? | Foster relations of recommendations with equity |                           |                              |

Note: Describing a process of development: topic scoping, assessing the evidence, draft guideline, final guideline. Providing some examples on how to addressing equity into guidelines

Aldrich 2003 [17], NHMRC 2002 [26]

| Items                                                                                                                                                                                                                                                                                                                                                    | Categories                                                         | Coding                           | Themes                                  |
|----------------------------------------------------------------------------------------------------------------------------------------------------------------------------------------------------------------------------------------------------------------------------------------------------------------------------------------------------------|--------------------------------------------------------------------|----------------------------------|-----------------------------------------|
| SEP refers to the components of economic and social well-being in a societal context. It is a concept that includes both: resource-based measures such as income and educational qualifications; and prestige-based measures such as an individual’s rank or status in a social hierarchy, for example the prestige associated with certain occupations. | Definitions of SEP                                                 | Equity issues                    | Scoping questions                       |
| Table 2: Markers and search terms for socioeconomic position                                                                                                                                                                                                                                                                                             | Providing some markers and search terms for socioeconomic position | Search terms                     | Searching relevant evidence             |
| Socioeconomic status as an effect modifier in RCTs                                                                                                                                                                                                                                                                                                       | Assessing the impact of SEP and health in RCTs.                    | Appraisal scientific evidence    | Appraising evidence and recommendations |
| Problems in extrapolation of RCTs to disadvantaged populations. “Randomized controlled trials frequently use homogeneous population samples and analyze the effects of simple, single interventions. Factors associated with consent, inclusion and exclusion are not always randomly distributed.”                                                      | Baseline characteristics and eligibility criteria in evidence body | Targeted population              | Scoping questions                       |
| Assessing the quality of evidence on SEP. ‘evidence exists on the various relationships between SEP and health in epidemiological, cohort, cross-sectional, observational, and                                                                                                                                                                           | Assessing the quality of evidence                                  | Appraisal of scientific evidence | Appraising evidence and recommendations |

|                                                                                                                                                                                                                                                                                                                                         |                                                                                          |                                                   |                                                                      |  |
|-----------------------------------------------------------------------------------------------------------------------------------------------------------------------------------------------------------------------------------------------------------------------------------------------------------------------------------------|------------------------------------------------------------------------------------------|---------------------------------------------------|----------------------------------------------------------------------|--|
| qualitative studies.’                                                                                                                                                                                                                                                                                                                   |                                                                                          |                                                   |                                                                      |  |
| Literature review on the relationship between socioeconomic position and health and clinical practice guidelines. ‘Guideline developers explicitly acknowledge evidence of the relationship between SEP and health and then use that evidence to shape and develop guidelines and associated recommendations for the broad population.’ | Showing evidence on why equity should be addressed into guideline                        | Necessary of equity                               | Scoping questions                                                    |  |
| A framework for using evidence on socioeconomic position in the development of clinical practice guidelines                                                                                                                                                                                                                             |                                                                                          |                                                   |                                                                      |  |
| Summarizing the following items                                                                                                                                                                                                                                                                                                         | Framework                                                                                | Framework                                         | Process                                                              |  |
| Step 1: Identify the health decisions required.                                                                                                                                                                                                                                                                                         |                                                                                          |                                                   |                                                                      |  |
| The health decision could be any type, from individual treatment decisions to the formulation of guidelines for whole communities. In the context of CPG development, there may be many decisions at different points in the diagnosis/ treatment pathway for a single guideline.                                                       | Clinical decisions required                                                              | Equity issues                                     | Scoping questions                                                    |  |
| Step 2: Search the literature for evidence that, due to SEP, population subgroups may experience barriers to and/or have limited capacity or opportunities to achieve equal health gains.                                                                                                                                               |                                                                                          |                                                   |                                                                      |  |
| The literature should be searched using markers of SEP, the condition or disease of interest, and the required health decision to identify population sub-groups which may experience barriers, limited capacity or opportunities to achieve the same health gains as other sub-groups or populations.                                  | Searching evidence on equity                                                             | Equitable searching                               | Searching relevant evidence                                          |  |
| Step 3: Search the literature to identify interventions that address barriers and/or opportunities to achieving equal health gains                                                                                                                                                                                                      |                                                                                          |                                                   |                                                                      |  |
| Literature describing interventions that attempt to address barriers to achieving equal health gains across sub-groups should be identified.                                                                                                                                                                                            | Searching and assessing equitable evidence on application                                | Appraisal of applications and searching evidences | Searching relevant evidence, appraising evidence and recommendations |  |
| Step 4: Synthesize evidence from Steps 2 and 3 and current clinical best practice evidence to develop recommendations                                                                                                                                                                                                                   |                                                                                          |                                                   |                                                                      |  |
| Develop recommendations in order to achieve health gains in terms of mortality, morbidity, survival, well-being and equity.                                                                                                                                                                                                             | Formulating equitable recommendations                                                    | Formulating recommendations                       | Formulating recommendations                                          |  |
| Other                                                                                                                                                                                                                                                                                                                                   |                                                                                          |                                                   |                                                                      |  |
| What to do when there is no evidence: broadening the search strategy; broadening the search scope; applying generic principles to promote health equity                                                                                                                                                                                 | Change searching strategies, scope, and promotion strategies, when no evidence was found | Searching and implementation                      | Searching relevant evidence, monitoring implementation               |  |
| Note: Providing a process of guideline development<br>Providing some examples and case study on how to develop guideline.                                                                                                                                                                                                               |                                                                                          |                                                   |                                                                      |  |

| Keuken DG 2007 [27]                                                                                                                                                                                                                                                                                                                           | Recommendation for focusing on sex-related factors in guideline development |                                                 |                                                |
|-----------------------------------------------------------------------------------------------------------------------------------------------------------------------------------------------------------------------------------------------------------------------------------------------------------------------------------------------|-----------------------------------------------------------------------------|-------------------------------------------------|------------------------------------------------|
| Items                                                                                                                                                                                                                                                                                                                                         | Categories                                                                  | Coding                                          | Themes                                         |
| <p>Formulation of initial key questions (and sub questions)</p> <p>Guideline developers should make an assessment to determine if there are any plausible reasons for anticipating differential relative effects for both sexes. If so, make sure that the key questions are formulated clearly to facilitate a review of the literature.</p> | <p>Considering differential relative effects across gender</p>              | <p>Social determinants of target population</p> | <p>Scoping questions</p>                       |
| <p>Development of search strategies</p> <p>Guideline developers should make sure that search strategies are capable of detecting evidence (both direct and indirect) that supports or refutes any hypothesized differential effects.</p>                                                                                                      | <p>Importance of an equitable search strategy</p>                           | <p>Search strategy</p>                          | <p>Searching relevant evidence</p>             |
| <p>Appraisal of scientific evidence</p> <p>Guideline developers should determine whether the studies they review are well designed.</p>                                                                                                                                                                                                       | <p>Well designed studies</p>                                                | <p>Assessing study design</p>                   | <p>Appraising evidence and recommendations</p> |
| <p>Guideline developers should determine whether the study population is stratified and whether it is sufficiently large for an analysis of differential effects on the basis of sex.</p>                                                                                                                                                     | <p>Large sample size for analysis across gender</p>                         | <p>Appraising sample size</p>                   | <p>Appraising evidence and recommendations</p> |
| <p>Guideline developers should determine whether the relevant subgroup analyses have been carried out correctly (in key studies).</p>                                                                                                                                                                                                         | <p>Correctly subgroup analysis</p>                                          | <p>Appraising analysis methods</p>              | <p>Appraising evidence and recommendations</p> |
| <p>Guideline developers should determine whether sex is a modifier for the research outcome.</p>                                                                                                                                                                                                                                              | <p>Sex as a modifier</p>                                                    | <p>Detecting modifiers</p>                      | <p>Appraising evidence and recommendations</p> |
| <p>Formulation of recommendations for the guideline</p> <p>Where appropriate, guideline developers may consider how likely it is that the results of published research are applicable to both men and women when formulating recommendations.</p>                                                                                            | <p>Applicability of study results</p>                                       | <p>Applicability of evidence</p>                | <p>Appraising evidence and recommendations</p> |
| <p>Where appropriate, guideline developers may consider how likely it is that differences in baseline risk would result in differential absolute effects when formulating recommendations.</p>                                                                                                                                                | <p>Influences across baseline risk on absolute effects</p>                  | <p>Influence of equity evidences</p>            | <p>Appraising evidence and recommendations</p> |
| <p>Where appropriate, guideline developers may consider how likely it is that there are important differences in trade-offs between any anticipated harmful and beneficial effects when formulating recommendations.</p>                                                                                                                      | <p>Balance between harms and benefits</p>                                   | <p>Balance between harms and benefits</p>       | <p>Formulating recommendations</p>             |
| <p>Where appropriate, guideline developers may consider</p>                                                                                                                                                                                                                                                                                   | <p>Warrant on the usage of different</p>                                    | <p>Equitable usage of</p>                       | <p>Monitoring</p>                              |

1  
2  
3  
4  
5  
6  
7  
8  
9  
10  
11  
12  
13  
14  
15  
16  
17  
18  
19  
20  
21  
22  
23  
24  
25  
26  
27  
28  
29  
30  
31  
32  
33  
34  
35  
36  
37  
38  
39  
40  
41  
42  
43  
44  
45  
46  
47  
48  
49  
50  
51  
52  
53  
54  
55  
56  
57  
58

|                                                                                                                                                                                                                                                                   |                                                                         |                               |                                 |
|-------------------------------------------------------------------------------------------------------------------------------------------------------------------------------------------------------------------------------------------------------------------|-------------------------------------------------------------------------|-------------------------------|---------------------------------|
| whether any of these considerations warrant the use of different recommendations when formulating recommendations.                                                                                                                                                | recommendations                                                         | recommendations               | implementation                  |
| Other (For composition of the guideline document)                                                                                                                                                                                                                 |                                                                         |                               |                                 |
| Guideline developers should have prior knowledge of the various ways in which sex-related factors can be represented in guidelines: when evidence has been found; if differences were expected but no evidence was found; if no information is available.         | Knowledge of the various ways on reporting guidelines                   | Variable reporting            | Others: reporting of guidelines |
| Selected sex-related factors may be mentioned in various subsections of the document: throughout the text; in specific paragraphs; in a subsection on special populations; in footnotes.                                                                          | Highlighting the gender factor                                          | Reporting                     | Others: reporting of guidelines |
| It is useful to reflect on the advantages and disadvantages of each option before drafting the guideline.                                                                                                                                                         | Trade-offs between advantages and disadvantages of different reporting. | Assessing equitable reporting | Others: reporting of guidelines |
| Note: Describing a process of development: formulation of initial key questions (and sub questions); development of search strategies; appraisal of scientific evidence; formulation of recommendations for the guideline; composition of the guideline document. |                                                                         |                               |                                 |

| WHO 2012 [28]                                                                                                                                                                                                                                                                                                                                                                                                                               |                                                                                       |               |                             |
|---------------------------------------------------------------------------------------------------------------------------------------------------------------------------------------------------------------------------------------------------------------------------------------------------------------------------------------------------------------------------------------------------------------------------------------------|---------------------------------------------------------------------------------------|---------------|-----------------------------|
| Items                                                                                                                                                                                                                                                                                                                                                                                                                                       | Categories                                                                            | Coding        | Themes                      |
| Who is targeted by the action being recommended?<br>(1) How can they be best described? What are the relevant demographic factors? Please consider age groups, sex, ethnicity, social identities, behavioral characteristics, etc.<br>(2) What is the setting? For example, hospitals, communities, schools.<br>(3) Are there any subgroups that might need to be considered?<br>(4) Are there groups or subgroups that should be excluded? | Population characteristics (including equity issues), subgroup and exclusion criteria | Equity issues | Scoping questions           |
| ‘Figure 6.1 Evidence retrieval decision diagram’ provided a process on how to identify relevant systematic review, including social and educational policies and practices (the Campbell Collaboration). Eligibility studies from low- and middle-income countries and regional databases are highlighted in ‘Search strategies’ section.                                                                                                   | Searching relevant studies to equity                                                  | Searching     | Searching relevant evidence |

1  
2  
3  
4  
5  
6  
7  
8  
9  
10  
11  
12  
13  
14  
15  
16  
17  
18  
19  
20  
21  
22  
23  
24  
25  
26  
27  
28  
29  
30  
31  
32  
33  
34  
35  
36  
37  
38  
39  
40  
41  
42  
43  
44  
45  
46  
47  
48  
49  
50  
51  
52  
53  
54  
55  
56  
57  
58

---

Note: Providing some examples on how to address equity issues into guidelines.

Providing a process of developing questions: Step 1: Generate initial list of questions; Step 2: Draft PICO questions; Step 3: List relevant outcomes; Step 4: Comment and revise; Step 5: Rate outcomes; Step 6: Prioritize questions

---

## How equity is addressed in clinical practice guidelines: a content analysis

Chunhu SHI<sup>1,2</sup>, Jinhui TIAN<sup>1,2</sup>, Quan WANG<sup>1,2,3</sup>, [Jennifer Petkovic](#)<sup>4</sup>, Dan REN<sup>2,3</sup>, Kehu YANG<sup>1,2</sup>-  
[Yang Yang](#)<sup>5</sup>

1. Evidence-Based Medicine Center, School of Basic Medical Sciences, Lanzhou University;
2. Key Laboratory of Evidence Based Medicine and Knowledge Translation of Gansu Province;
3. The First Clinical Medicine School, Lanzhou University;
4. ~~School of Basic Medical Sciences, Lanzhou University;~~
5. ~~Centre for Global Health, University of Ottawa, Canada;~~
5. [School of Nursing, Tianjin University of Traditional Chinese Medicine, Tianjin, China.](#)

### Corresponding Author

Kehu YANG, Evidence Based Medicine Centre of Lanzhou University; Key Laboratory of Evidence Based Medicine and Knowledge Translation of Gansu Province. 199 Donggang West Road, Lanzhou, Gansu, China, 730000

E-mail: [kehuyangebm2006@126.com](mailto:kehuyangebm2006@126.com)

### Email addresses of all authors

Chunhu SHI: [shihchoonhrou@gmail.com](mailto:shihchoonhrou@gmail.com);

Jinhui TIAN: [tianjh@lzu.edu.cn](mailto:tianjh@lzu.edu.cn);

Quan WANG: [371438006@qq.com](mailto:371438006@qq.com);

Dan REN: [1290250592@qq.com](mailto:1290250592@qq.com);

Jennifer [Petkovic](mailto:jennifer.petkovic@uottawa.ca): [jennifer.petkovic@uottawa.ca](mailto:jennifer.petkovic@uottawa.ca);

Kehu YANG: [kehuyangebm2006@126.com](mailto:kehuyangebm2006@126.com)

Yang Yang: [yang7273@126.com](mailto:yang7273@126.com)

### Author Contributions

- 1) Conceiving and designing this review: Chunhu SHI, Jinhui TIAN and Kehu YANG,
- 2) Searching, extracting data and analyzing the data: Chunhu SHI, Quan WANG and Kehu YANG,
- 3) Writing, amending and revising manuscript: Chunhu SHI, Jinhui TIAN, Dan REN, Jennifer [Petkovic](#) and [Yang Yang](#),
- 4) When disagreements happened, discussing with Kehu YANG and Jinhui TIAN.
- 5) Final approval of manuscript: Chunhu SHI, Jinhui TIAN, Quan WANG, Dan REN, Jennifer [Petkovic](#), Kehu YANG and Yang Yang,
- 6) Important comments and English editing: Jennifer [Petkovic](#) and [Yang Yang](#)

## Abstract

### **Background**

~~Clinical practice guidelines (CPGs) assist practitioner and patient decisions for specific clinical circumstances. The number of CPGs has increased dramatically and have focused on the effectiveness and cost-effectiveness of interventions to balance benefits versus harms and cost. However, equity rarely is addressed in CPGs. Incorporating equity into guidelines presents methodological challenges.~~

### **Objectives**

Considering equity into guidelines presents methodological challenges. This study aims to qualitatively synthesize~~To review~~ the methods for incorporating equity in CPGs.

### **Setting**

Content analysis of methodological publications.

### **Eligibility criteria for selecting studies**

Methodological publications were included if they

### **Design**

~~We electronically searched Medline, retrieved references, and browsed guideline development organization websites to identify eligible papers which provide checklists/frameworks/tools/recommendations on when, how and to what extent equity should be incorporated in CPGs.~~

### **Data sources**

We electronically searched Medline, retrieved references, and browsed guideline development organization websites from inception to Jan 2013. No assessment of quality was conducted. After study selection by two authors, general characteristics and checklists items/framework components from included studies were extracted. Based on the questions or items from checklists/frameworks (unit of analysis), content analysis was conducted to identify themes and questions/items were grouped into these themes.

### **Primary outcomes**

The primary outcomes were methodological themes and processes on how to address equity issues in guideline development.

## **Results**

~~Ten~~ 8 studies with 10 publications~~papers~~ were included from 3405 citations. In total, a list of 87 questions/items was generated from 17 checklists/frameworks. After content analysis, questions were grouped into 8 themes ("scoping questions", "searching relevant evidence", "appraising evidence and recommendations", "formulating recommendations", "monitoring implementation", "providing a flow chart to include equity in CPGs", and "others: reporting of guidelines and comments from stakeholders" for CPG developers and "assessing the quality of CPGs" for CPG users). Four included studies covered more than five of these themes. We also summarized the process of guideline development based on the themes mentioned above.

## **Conclusion**

For disadvantaged population-specific CPGs, eight important methodological issues identified in this review should be considered when including equity in CPGs under the guidance of a scientific guideline development manual.



### Strengths and limitations of this study

■ Methodological challenges are the barriers of incorporating equity into guidelines. For this topic, this study synthesizes some themes (“scoping questions”, “searching relevant evidence”, “appraising evidence and recommendations”, “formulating recommendations”, “monitoring implementation”, “providing a flow chart to include equity in CPGs”, and “others: reporting of guidelines and comments from stakeholders” for CPG developers and “assessing the quality of CPGs” for CPG users) and a developing process through a content analysis of eight studies.

■ These findings allow the guideline panel to consider equity issues into guidelines and contribute methodologists to develop a methodological document in future.

These findings provide some valuable guidance, however no statement on methodological issues in equity or new checklist is built.

### **Background**

Health is defined by the World Health Organization (WHO) as “a state of complete physical, mental and social well-being and not merely the absence of disease or infirmity”<sup>[1]</sup>. Health outcomes can be influenced by inaccessibility to health interventions for certain population groups, such as the poor and because of unequal distribution of medical resources. When differences in health outcomes across socioeconomic, demographic and geographic factors are avoidable, unnecessary and unjust they are described as health inequities <sup>[2,3]</sup>. The WHO recognizes that inequities in health should be reduced since health is a fundamental human right <sup>[4]</sup> and, in 2005, set up the Commission on Social Determinants of Health to collect, collate, and synthesize evidence on inequities and to make recommendations for action to address them <sup>[5]</sup>.

Inequities in health and health care are well documented in relation to social and economic factors, according to the acronym PROGRESS-Plus, including Place of residence, Race/ethnicity/culture/language, Occupation, Gender/sex, Religion, Education, Socioeconomic status and Social capital <sup>[6]</sup> and additional factors related to personal characteristic, features of relationships, and time-dependent characteristics (captured by “Plus”) <sup>[7]</sup>. Equity issues have been shown to have negative effects on health status <sup>[8-13]</sup>. For example, as Wallace et al. <sup>[14]</sup> reported, the HIV epidemics structure in the US was influenced by two such determinants, the link between geographic regions and the socioeconomic structure, function, and history of the regions.

Clinical practice guidelines, as defined by the Institute of Medicine, are ‘systematically developed statements to assist practitioner and patient decisions about appropriate health care for specific clinical circumstances.’ <sup>[15]</sup> They are an increasingly familiar part of clinical practice and may provide concise guidance on which assessment programs to order, how to provide medical or surgical interventions, or other details of clinical practice <sup>[16]</sup>. Guideline development is becoming more evidence-based <sup>[17]</sup>. CPGs advocate that the most effective therapies are recommended as suggested by the evidence, however, the most effective intervention may not be available to all groups within a population. For example, a new therapy may be effective, but CPG developers need to consider whether it is available (and sufficiently cost-effective) for disadvantaged populations <sup>[18]</sup>.

Therefore, CPG developers should discuss whether recommendations can ensure equitable provision of health care for the disadvantaged. Regardless of the setting, there is potential for the CPG to introduce inequities. Differences in health outcomes across population groups are possible

1  
2  
3 if equity is not considered in guideline development, CPGs and their recommendations [have the](#)  
4 [potential to](#) create or increase health inequities <sup>[19]</sup>. The inclusion of equity considerations in CPG  
5 development and implementation has become increasingly important <sup>[20, 21]</sup>. [For example, to](#)  
6 [balance the effective versus efficiency dilemma of CPGs, the National Health Service \(NHS\)](#)  
7 [recommends the development of guiding principles to support the pursuit of equity in health care](#)  
8 [\[22\]](#). However, incorporating equity into guidelines remains a challenge; the main barriers are  
9 methodological and conceptual limitations <sup>[20, 23]</sup>. [We](#) aimed to review methods for including  
10 equity considerations in CPGs [in this paper](#).

### 13 **Present investigation**

#### 14 **Eligibility criteria**

15 We conducted this review to investigate methodological guidance for including equity in CPGs.  
16 Only methodological guidance, guidelines, and articles that described when, how and to what  
17 extent equity issues could be incorporated in CPGs were included in this review. [Types of eligible](#)  
18 [studies included: guidelines for incorporating equity into CPGs, empirical literature discussing](#)  
19 [equity-specific methodological issues of CPG development, quantitative or qualitative literature](#)  
20 [reviews that identify equity-specific methodological elements of CPG development.](#)

#### 23 **Information sources and search**

24 Relevant studies were obtained from the following sources.

- 25 1) MEDLINE (1966 to Jan 2013) was electronically searched using an adapted version of the  
26 search strategy developed by Haase A et al. (2007) for the identification of clinical practice  
27 guidelines <sup>[24]</sup>: (recommendation[All Fields] OR "consensus"[MeSH Terms] OR  
28 "consensus"[All Fields] OR "guideline"[Publication Type] OR "guidelines as topic"[MeSH  
29 Terms] OR "guideline"[All Fields]) AND (equal\* OR equal[All Fields] OR "Civil  
30 Rights"[Mesh] OR equity[All Fields] OR equit\*) limited in "Humans and Title/Abstract";
- 31 2) Relevant studies were retrieved from reference lists of eligible articles;
- 32 3) In Jan 2013, we browsed guideline development organizations' websites including: National  
33 Institute for Health and Clinical Excellence (NICE), New Zealand Guidelines Group, Scottish  
34 Intercollegiate Guidelines Network ([SIGN](#)), Guideline International Network (G-I-N), CMA  
35 Infobase: Clinical Practice Guidelines, PUBGLE, Trip Database, and National Guideline  
36 Clearinghouse, etc.;
- 37 4) Online publications from the 'International Journal for Equity in Health' (from 2002 to Jan  
38 2013) was hand-searched;
- 39 5) We also emailed SIGN, the New Zealand Guidelines Group and National Guideline  
40 Clearinghouse, etc. to access specific documents.

#### 46 **Study selection and data collection process**

47 Authors CHS and QW independently screened titles and abstracts. The full text (if published) of  
48 all potentially relevant studies were retrieved and independently assessed for inclusion by QW and  
49 KHY. CHS and KHY carried out data extraction independently using a standard data extraction  
50 form (Appendix 1: Data extraction form). We planned to translate papers reported in non-English  
51 language journals (if any) before assessment. Where more than one publication on the same  
52 guidance existed, only the publication with the most complete data was included. Any further  
53 information or clarification required from the authors was requested by written or electronic  
54 correspondence and relevant data obtained in this manner were included in the review.  
55 Disagreements were resolved in consultation [with co-authors](#).

## Data items

In this review, data items are the questions or items from all available instruments, checklists, critical appraisal tools and indices which were designed to guide the incorporation of equity issues into CPGs or assessing the quality of [equity considerations within CPGs](#). No data on participants, interventions, comparators, clinical outcomes and study designs was extracted.

## Synthesis of results

Written phrases were the unit of analysis [and therefore](#) no quantitative data were analyzed by specific software. Using content analysis, authors CHS and JHT synthesized methodological themes and processes on how to address equity issues in guideline development. Content analysis is ‘a research technique for making replicable and valid inferences from data to their context.’ <sup>[25]</sup>, which ‘emphasizes the quantification of the ‘what’ that messages communicate, the ‘who’ (the source), the ‘why’ (the encoding process) and the consequences of ‘effects’ they have ‘on whom’ <sup>[25]</sup>, by which themes can be summarized from meaningful qualitative data. A simplified process was used in this review: identifying units of analysis (the items/questions), excluding irrelevant information, abstracting the phrase or words from each unit of analysis, labeling these concepts, grouping [them](#), and creating themes to link the underlying concepts together in categories. (Appendix 2: The process of content analysis) No additional analysis was used in this review.

## Results

### Guidance selection

We retrieved 3370 citations from MEDLINE [and 23 additional citations from the](#) guideline development organization websites, the International Journal for Equity in Health and emailing guideline development organizations. After [removing duplicates and](#) reviewing titles and abstracts, [3368 citations were excluded. By reviewing reference lists of the remaining 23 full-text articles, we obtained 12 relevant citations.](#) In total, 35 potentially relevant full texts were screened, out of which 25 full-texts were excluded. The [main](#) reason for exclusion was that [the focus of](#) the papers [was not on](#) methods for addressing equity in CPGs. Finally, 8 [papers/studies with 10 publications \(from 10 documents\)](#) <sup>[19-21,26-32]</sup> were included in this review (Figure 1: Selection process of included studies).

### Study characteristics

[Six studies/papers](#) <sup>[19-21,26,27,31]</sup> were retrieved from Medline, [and four](#) <sup>[28-30,32]</sup> were identified from guideline development organizations’ websites. Only three studies <sup>[19,21,26]</sup> defined equity issues according to different definitions <sup>[2,33,34]</sup>. [Included studies focused on different methodological topics related to equity including why](#) <sup>[19]</sup>, [when](#) <sup>[26]</sup>, [what](#) <sup>[26]</sup> and [how](#) <sup>[19,20,26-32]</sup> CPG developers should address equity issues in CPGs, [and how to assess the quality of CPGs, including equity.](#) <sup>[21]</sup> for CPG users. Five studies (from 7 publications/papers) <sup>[19,20,27-30,32]</sup> did not provide details of financial support. [The characteristics of the included studies are provided in the Table 1.](#) [In terms of relevant information extracted and analyzed,](#) Keuken DG (2007) <sup>[31]</sup> provided [“Recommendation for focusing on sex-related factors in guideline development”](#); NICE (2012) <sup>[28,29]</sup> provided [“The protected characteristics”, “Equality in guideline development”](#), a [“Checklist for scoping”](#), a [“Checklist for early guideline development”](#) and a [“Checklist for formulating recommendations”](#); Dans AM (2007) <sup>[21]</sup> provided [“The equity lens”](#) to assess the quality of guidelines including equity issues; [targeting at](#) on the WHO guidelines [mainly](#), Oxman AD (2006) <sup>[26]</sup> reviewed related articles to provide guidance to address equity in guidelines; Eslava-Schmalbach J (2011) <sup>[19]</sup> described why equity issues should be addressed in guidelines;

1  
2  
3 Acosta N (2011) [27] provided simple guidance for including equity in guidelines; [Aldrich \(2003\)](#)  
4 [20] and [NHMRC \(2002\)](#) [30] provided indicators and search terms for socioeconomic [factors](#) and a  
5 framework for using evidence on socioeconomic [factors](#) in the development of clinical practice  
6 guidelines; rather than focusing on equity issues in particular, the WHO (2012) [32] provided  
7 advice on equity issues in [its “PICO question components”](#) and [“evidence retrieval and](#)  
8 [synthesis”](#) sections.  
9

### 10 **Synthesis of results**

11 In total, 87 questions/items were collected. After content analysis, [eight](#) themes ([seven for CPG](#)  
12 [developers, one for CPG users](#)) were identified [as following \(see Appendix 3 Content analysis of](#)  
13 [the individual study\)](#). Then based on them, we outlined an integrated CPG development process  
14 [for developers, including seven steps in total \(see Figure 2 Overview of clinical practice](#)  
15 [guidelines development process \(for CPG developers\)\)](#).  
16

### 17 **For CPG developers:**

#### 18 **Scoping questions**

19 [Seven studies/papers](#) [19,20,26-32] reported the [development of CPGs should include “Scoping](#)  
20 [questions” by which CPG developers could consider the reasons for addressing equity in their](#)  
21 [CPG \(i.e. differential effectiveness across groups, negative impact of guideline without equity](#)  
22 [considerations, and improving overall effectiveness of guideline within equity\)](#) [19], [the scenario](#)  
23 [and timing when equity should be addressed \(example.g. the presence of differential effects across](#)  
24 [groups\)](#) [26], [targeted populations, social determinants of health specified by PROGRESS or](#)  
25 [PROGRESS-Plus frameworks](#) [6,7], and the changes and comments [from stakeholders for the](#)  
26 [proposed question](#) [28,29].  
27

#### 28 **Searching relevant evidence**

29 Four of the included [studies](#) [20,28-32] ([six publications](#)) described the ‘[Searching relevant evidence](#)’  
30 theme, including [appropriate](#) study designs, [changing](#) search strategies [when necessary, using](#)  
31 [terms/markers for equity, and appraising the](#) eligibility criteria.  
32

#### 33 **Appraising evidence and recommendations**

34 [Five papers/studies](#) [20,26-31] with [seven documents checklists/frameworks/publications](#) fulfilled the  
35 “[Appraising evidence and recommendations](#)” theme, including the appraisal of scientific evidence,  
36 such as the appraisal of appropriate modifiers, study design, sample size, analysis methods, the  
37 applicability and relevance of evidence, influence of equity evidences, the quality of evidence, the  
38 necessity of evidence and making changes and evidence gaps, as well as the appraisal of  
39 recommendations, such as the relevance of recommendations, the impact of recommendations and  
40 the quality of development process.  
41

#### 42 **Formulating recommendations**

43 [Three papers/studies](#) [20,28-31] with [five checklists/frameworks/publications](#) provided guidance for  
44 how [CPG developers should](#) formulate recommendations [to address equity issues as well as the](#)  
45 [elements that](#) should be considered when [synthesizing the evidence and](#) formulating  
46 recommendations, including [analyzing different subgroup effects, listing different/inconsistent](#)  
47 [evidence, balancing](#) harms and benefits [for disadvantaged populations](#), formulating equitable  
48 recommendations (such as considering barriers and facilitators of interventions [for disadvantaged](#)  
49 [populations](#), and mitigating negative effects that may produce inequities during the formulation of  
50 recommendations), [and](#) how to advance recommendations and adjust recommendations.  
51

#### 52 **Monitoring implementation**

Four papers studies <sup>[20,26,27,30,31]</sup> with five documents checklists/frameworks publications described the “Monitoring implementation” theme. These papers studies included guidance on what should be considered during the implementation of CPGs and how to monitor implementation. Guidance suggested that CPG developers should minimize barriers to implementation, inform adaptation and decision-making in some specific settings, develop an equitable implementation strategy, change the organizational structure, and monitor the effects of implementation. When no evidence is available, CPG developers should change search strategies, scope of the questions, and promotion strategies.

#### **Providing a flow chart to include equity in CPGs**

Four papers studies <sup>[19,20,28-31]</sup> were included in the “Providing a flow chart to include equity in CPGs” theme. These included following common steps: identifying questions, developing search strategies, appraising scientific evidence, synthesizing the evidence, formulating recommendations and writing the guideline documents. Almost all of the elements in this theme were captured by the other themes except “Synthesizing the evidence”. This additional element suggests that CPG developers should analyze subgroup effects, describe different/inconsistent evidence, balance harms and benefits, and consult comments from stakeholders.

#### **Others: reporting of guidelines and comments from stakeholders**

Keuken DG (2007) <sup>[31]</sup> reported the knowledge needs for the various ways of reporting guidelines. The authors stated that CPGs developers should balance advantages and disadvantages of different reporting methods. NICE (2012) <sup>[28,29]</sup> highlighted the need for engagement with stakeholders during every stage of the development process.

#### **For the CPGs users:**

##### **Assessing the quality of CPGs**

Dans AM (2007) <sup>[21]</sup> reported how CPG users can assess the quality of CPGs. This paper study includes limited guidance, including whether recommendations considered priorities for disadvantaged populations, and factors to explore differential effects across groups during the scoping stage. The authors suggest CPG users assess whether differential effects of the intervention across groups are valued, consider these when implementing the recommendations in practice, and address barriers to implementation, and the impact of the recommendations.

=

~~the seven~~

#### **Discussion**

##### **Summary of evidence**

We identified eight papers studies with 10 publications focusing on how to address equity issues in guidelines. Using different definitions of health equity the eight guiding studies may result in the difference of identifying the same conditions related to equity. Few studies provided methodological guidance to help CPG users identify important information on equity. After qualitative analysis, eight themes were identified, which included “scoping questions”, “searching relevant evidence”, “appraising evidence”, “formulating recommendations”, “monitoring implementation”, “providing a flow chart to include equity in CPGs”, and “others: reporting of guidelines and comments from stakeholders” for CPG developers and “assessing the quality of CPGs” for CPG users. Most of the included studies provided CPG developers or users with open-ended questions in checklists/frameworks rather than with a tool (with examples) to judge why, what, when, and how equity issues should be addressed. Few guidance



documentations described how to assess the quality of CPGs which considered equity issues in their recommendations, the process for developing CPGs, or how to report equity considerations. NHMRC (2003) [30], Keuken DG (2007) [31], Aldrich R (2003) [20] and NICE (2012) [28,29] covered more than five themes.

All included papers reported the “scoping questions” theme. When a guideline is developed, a rational for equity considerations should be described based on the differential effectiveness of interventions between subgroups. The PROGRESS and PROGRESS-Plus acronyms are recommended for identifying potentially disadvantaged groups when describing the scope of the CPG [6]. Four papers [20,28-32] described the “searching relevant evidence” theme, but, only NICE (2012) [28,29] suggested the consideration of study design. NHMRC (2003) [30] & Aldrich R (2003) [20] provided search terms on equity issues. Identifying evidence including systematic reviews, clinical practice guidelines, randomized controlled trials and supplementary literature is essential for CPG development. The search strategy must be transparent and reproducible. The reporting of databases, time periods, key words, subject headings, language restrictions, gray literature, and eligibility criteria should be considered [35].

Before formulating recommendations, the quality of scientific evidence must be appraised by appropriate appraisal tools. The relevance, applicability, impact of evidence on equity and evidence gaps should be assessed. Equity-specific CPG developers should focus on important questions, for example whether CPGs gave priority to the disadvantaged, how the applicability of the CPG and its evidence for disadvantaged populations was assessed, and whether implementation and monitoring strategies will detect effects for the most disadvantaged [36]. When evidence gaps exist, expert opinion or consensus is necessary to allow CPG developers to highlight future research needs [35]. NHMRC (2003) [30] & Aldrich R (2003) [20] provide strategies that can be used when there is a lack of evidence. For specific population subgroups, guideline developers should counterpoise harms and benefits of interventions, consider barriers and facilitators of interventions, and adjust recommendations for specific settings. Only Dans AM (2007) provided an equity lens to appraise the quality of a CPG with equity considerations. For the development of a CPG, we suggest that a well-designed handbook such as the “WHO handbook for guideline development” [32], “SIGN 50 A guideline developer’s handbook” [37], “Handbook on Clinical Practice Guidelines” [38] or NICE “the guidelines manual 2012” [28] is utilized. The process of CPG development (Figure 2) outlined in this paper will be more effective when used in combination with the handbooks mentioned above.

### Limitations

With the comprehensive search strategy, only 8 papers (containing 87 questions or items) were included in this review. However, compared to previous reviews [27], our study includes a wider collection of handbooks and guidance documents. Although Acosta N (2011) included 20 studies (of which only three [21,26,30] were included in our review), [27] the authors only discussed equity in the development of CPGs with a narrative literature review. We extracted the methodological checklists/frameworks from the eligible studies and conducted content analysis. Content analysis was used because of its methodological characteristics and reliable measures to achieve trustworthiness [39]. However, a limitation of content analysis is that the likelihood of replicability for the analysis procedure is low [25].

### Conclusions

By reviewing the existing guidance documents and guidelines, eight themes (i.e. “scoping

1  
2  
3 [questions](#)”, [“searching relevant evidence”](#), [“appraising evidence and recommendations”](#),  
4 [“formulating recommendations”](#), [“monitoring implementation”](#), [“providing a flow chart to include](#)  
5 [equity in CPGs”](#), and [“others: reporting of guidelines and comments from stakeholders”](#) for CPGs  
6 [developers and “assessing the quality of CPGs” for CPGs users](#)) were identified for guiding the  
7 incorporation of equity issues into clinical practice guidelines. Among existing checklists, Keuken  
8 DG (2007) <sup>[31]</sup> and NHMRC (2003) <sup>[30]</sup> covered most of these themes and have the greatest  
9 potential to be used as a tool for guiding equity considerations in guidelines. No grading systems  
10 or scoring criteria were found from existing checklists.  
11  
12

13  
14 **Funding:** No financial support.

15 **Conflict of interest:** None.

16 This abstract was accepted as an oral presentation in 21<sup>st</sup> Cochrane Colloquium in Canada on  
17 Monday, 23 September 2013.

18 [Figure 1 Selection process of included studies](#)

19 [Figure 2 Overview of clinical practice guidelines development process \(for CPGs developers\)](#)  
20  
21  
22  
23

## 24 References

- 25 1. World Health Organization. (1947) The constitution of the World Health Organization, in  
26 World Health Organization Chronicles.
- 27 2. Whitehead M. (1992) The concepts and principles of equity in health. *Int J Health Serv*  
28 22:429-445.
- 29 3. Ministry of Health, Reducing Inequalities in Health. 2002, Ministry of Health: Wellington.
- 30 4. World Health Organization. Health Systems: Equity. Available from:  
31 <http://www.who.int/healthsystems/topics/equity/en>. Accessed 25 September 2013.
- 32 4.5. [CSDH \(2008\). Closing the gap in a generation: health equity through action on the social](#)  
33 [determinants of health. Final Report of the Commission on Social Determinants of Health.](#)  
34 [Geneva, World Health Organization.](#)
- 35 6. O'Neill J, Tabish H, Welch V, et al. (2014) Applying an equity lens to interventions: using  
36 PROGRESS ensures consideration of socially stratifying factors to illuminate inequities in  
37 health. *J Clin Epidemiol.* 67(1):56-64.
- 38 7. [Oliver S, Dickson K, Newman M. \(2012\) Getting started with a review. In: Gough D, Oliver](#)  
39 [S, Thomas J, editors. An introduction to systematic reviews. London, UK: SAGE](#)  
40 [Publications.](#)
- 41 5-8. Long JA, Chang VW, Ibrahim SA, Asch DA. (2004) Update on the health disparities  
42 literature. *Ann Intern Med.* 141(10):805-812.
- 43 6-9. Vogel TR. (2012) Update and review of racial disparities in sepsis. *Surg Infect (Larchmt).*  
44 13(4):203-208.
- 45 7-10. Wallace R, Huang Y, Gould P, Wallace D. (1997) The hierarchical diffusion of AIDS and  
46 violent crime among US metropolitan regions: innercity decay, stochastic resonance and  
47 reversal of the mortality transition. *Soc Sci Med* 44:935-947.
- 48 8-11. Wallace R, Wallace D. (1997) Socioeconomic determinants of health: community  
49 marginalisation and the diffusion of disease and disorder in the United States. *BMJ.*  
50 314(7090):1341-1345.  
51  
52  
53  
54  
55  
56  
57  
58  
59  
60

- 1  
2  
3 | 9-12. Murray CJ, Vos T, Lozano R, et al. (2012) Disability-adjusted life years (DALYs) for 291  
4 | diseases and injuries in 21 regions, 1990-2010: a systematic analysis for the Global Burden  
5 | of Disease Study 2010. *Lancet*. 380(9859):2197-2223.  
6  
7 | ~~10-13.~~ Lozano R, Naghavi M, Foreman K, et al. (2012) Global and regional mortality from 235  
8 | causes of death for 20 age groups in 1990 and 2010: a systematic analysis for the Global  
9 | Burden of Disease Study 2010. *Lancet*. 380(9859):2095-2128.  
10  
11 | ~~11-14.~~ Wang H, Dwyer-Lindgren L, Lofgren KT, et al. (2012) Age-specific and sex-specific  
12 | mortality in 187 countries, 1970-2010: a systematic analysis for the Global Burden of  
13 | Disease Study 2010. *Lancet*. 380(9859):2071-2094.  
14 | 15. IOM (Institute of Medicine). 2011. Clinical Practice Guidelines We Can Trust. Washington,  
15 | DC: The National Academies Press.  
16 | ~~12-16.~~ Woolf SH, Grol R, Hutchinson A, Eccles M, Grimshaw J. (1999) Potential benefits,  
17 | limitations, and harms of clinical guidelines. *BMJ*. 318:527.  
18 | 17. Shekelle PG, Woolf SH, Eccles M, Grimshaw J. (1999) Clinical guidelines: developing  
19 | guidelines. *BMJ*. 318(7183):593-596.  
20 | ~~13-18.~~ McFarlane P. (2006) Not all guidelines are created equal. *CMAJ*. 174(6):814; discussion  
21 | 815.  
22 | ~~14-19.~~ Eslava-Schmalbach J, Sandoval-Vargas G, Mosquera P. (2011) Incorporating equity into  
23 | developing and implementing for evidence-based clinical practice guidelines. *Rev Salud*  
24 | *Publica (Bogota)*. 13(2):339-351.  
25 | ~~15-20.~~ Aldrich R, Kemp L, Williams JS, Harris E, Simpson S, Wilson A, McGillK, Byles J,  
26 | Lowe J, Jackson T. (2003) Using socioeconomic evidence in clinical practice guidelines.  
27 | *BMJ* 327(7426):1283-1285.  
28 | 21. Dans AM, Dans L, Oxman AD, Robinson V, Acuin J, Tugwell P, Dennis R, Kang D. (2007)  
29 | Assessing equity in clinical practice guidelines. *J Clin Epidemiol*. 60(6):540-546.  
30 | ~~16-22.~~ Sassi F, Le Grand J, Archard L. (2001) Equity versus efficiency: a dilemma for the NHS.  
31 | If the NHS is serious about equity it must offer guidance when principles conflict. *BMJ*.  
32 | 323(7316):762-3.  
33 | ~~17-23.~~ Burgers JS, Grol R, Klazinga NS, Makela M, Zaat J. (2003) Towards evidence-based  
34 | clinical practice: An international survey of 18 clinical guideline programs. *Int J Quality*  
35 | *Healthcare* 15:31.  
36 | ~~18-24.~~ Haase A, Follmann M, Skipka G, Kirchner H. (2007) Developing search strategies for  
37 | clinical practice guidelines in SUMSearch and Google Scholar and assessing their retrieval  
38 | performance. *BMC Med Res Methodol*. 7:28.  
39 | ~~19-25.~~ Krippendorff, K. Content Analysis. (1980) An Introduction to its Methodology. The  
40 | Sage Commtext Series, Sage Publications Ltd., London.  
41 | ~~20-26.~~ Oxman AD, Schünemann HJ, Fretheim A. (2006) Improving the use of research  
42 | evidence in guideline development: 12. Incorporating considerations of equity. *Health Res*  
43 | *Policy Syst*. 4:24.  
44 | ~~21-27.~~ Acosta N, Pollard J, Mosquera P, Reveiz L. (2011) [The concept of equity when  
45 | developing clinical practice guidelines]. [Article in Spanish] *Rev Salud Publica (Bogota)*.  
46 | 13(2):327-338.  
47 | ~~22-28.~~ The National Institute for Health and Clinical Excellence. The guidelines manual 2012.  
48 | Available from <http://publications.nice.org.uk/the-guidelines-manual-pmg6> Accessed. 29 Oct.  
49 |  
50 |  
51 |  
52 |  
53 |  
54 |  
55 |  
56 |  
57 |  
58 |  
59 |  
60 |



2013.

23-29. National Institute for Health and Clinical Excellence (November 2012) Positively equal: A guide to addressing equality issues in developing NICE clinical guidelines (Second edition). London: National Institute for Health and Clinical Excellence. Available from: [www.nice.org.uk](http://www.nice.org.uk)

24-30. National Health and Medical Research Council. Using socioeconomic evidence in clinical practice guidelines. Canberra: NHMRC, 2003:95. [www.nhmrc.gov.au/publications/synopses/cp65syn.htm](http://www.nhmrc.gov.au/publications/synopses/cp65syn.htm) Accessed 20 Jan 2013.

25-31. Keuken DG, Haafkens JA, Moerman CJ, Klazinga NS, ter Riet G. (2007) Attention to sex-related factors in the development of clinical practice guidelines. *J Womens Health (Larchmt)*. 16(1):82-92.

26-32. World Health Organization. (2012) WHO handbook for guideline development. WHO Press, Geneva, Switzerland. Available from: [www.who.int](http://www.who.int)

27-33. Braveman PA, Gruskin S. (2003) Defining equity in health. *J Epidemiol Community Health* 57:254e8.

28-34. Casas-Zamora JA, Ibrahim SA. (2004) Confronting health inequity: the global dimension. *Am J Public Health*. 94(12):2055-2058.

29-35. Rosenfeld RM, Shiffman RN, Robertson P. (2013) Clinical Practice Guideline Development Manual, Third Edition: a quality-driven approach for translating evidence into action. *Otolaryngol Head Neck Surg*. 148(1 Suppl):S1-55.

~~30-36. The AGREE Collaboration. The Appraisal of Guidelines for Research & Evaluation (AGREE) Instrument. Available from <http://www.agreecollaboration.org>. Accessed. 29 Oct. 2013.~~  
Dans AL, Dans LF. (2010) Appraising a tool for guideline appraisal (the AGREE II instrument). *J Clin Epidemiol*. 63 (12) :1281-2.

31-37. Scottish Intercollegiate Guidelines Network. SIGN 50 A guideline developer's handbook. Available from <http://www.sign.ac.uk/guidelines/fulltext/50/index.html> Accessed. 29 Oct. 2013.

32-38. Canadian Medical Association. Guidelines for Canadian clinical practice guidelines. Available from <http://mdm.ca/cpgsnew/cpgs/gccpg-e.htm>: Accessed. 29 Oct. 2013.

33-39. Graneheim UH, Lundman B. (2004) Qualitative content analysis in nursing research: concepts, procedures and measures to achieve trustworthiness. *Nurse Educ Today*. 24(2):105-112.

Table 1 Characteristics of the included **papersstudies**

| Study                                                          | Journal/Sources                       | Publication type       | Definition of equity                       | Scope                               | Targeted users                     | Funding                                                                 |
|----------------------------------------------------------------|---------------------------------------|------------------------|--------------------------------------------|-------------------------------------|------------------------------------|-------------------------------------------------------------------------|
| Eslava-Schmalbach J 2011 <sup>[19]</sup>                       | Rev. salud publica                    | Review                 | Casas-Zamora JA 2004,<br>Whitehead M. 1992 | Why,<br>How                         | <u>CPGs</u><br><u>developers</u> * | No declaration                                                          |
| Dans AM 2007 <sup>[21]</sup>                                   | Journal of Clinical<br>Epidemiology   | Article                | Braveman 2003,<br>Whitehead 1992           | Assessing<br>the quality<br>of CPGs | CPGs users                         | Rockefeller Foundation,<br>Norwegian Health Services<br>Research Center |
| Oxman AD 2006 <sup>[26]</sup>                                  | Health Research<br>Policy and Systems | Review                 | Braveman 2003,<br>Whitehead 1992           | When,<br>What,<br>How               | CPGs<br>developers                 | WHO,<br>Norwegian Knowledge Centre<br>for the Health Services           |
| Acosta N 2011 <sup>[27]</sup>                                  | Rev. salud publica                    | Review                 | None provided                              | How                                 | CPGs<br>developers                 | No declaration                                                          |
| NICE 2012 <sup>[28]</sup> &<br>NICE 2012 <sup>[29]</sup>       | NICE                                  | Guideline              | None provided                              | How                                 | CPGs<br>developers                 | No declaration                                                          |
| Aldrich R 2003 <sup>[20]</sup> &<br>NHMRC 2002 <sup>[30]</sup> | BMJ &<br>NHMRC                        | Article &<br>Guideline | None provided                              | How                                 | CPGs<br>developers                 | No declaration                                                          |
| Keuken DG 2008 <sup>[31]</sup>                                 | Dissertation                          | Dissertation           | None provided                              | How                                 | <u>CPGs</u><br><u>developers</u> * | Netherlands Organization for<br>Health Research and<br>Development      |
| WHO 2012 <sup>[32]</sup>                                       | WHO                                   | Guideline              | None provided                              | How                                 | CPGs<br>developers                 | No declaration                                                          |

**Note:** \* indicates that original studies did not report their targeted users by themselves and authors of this study specified them to be CPGs developers.

## Text S1 - Checklist of items to include when reporting a systematic review or meta-analysis

| Section/topic             | # | Checklist item                                                                                                                                                                                                                                                                                              | Reported on page # |
|---------------------------|---|-------------------------------------------------------------------------------------------------------------------------------------------------------------------------------------------------------------------------------------------------------------------------------------------------------------|--------------------|
| <b>TITLE</b>              |   |                                                                                                                                                                                                                                                                                                             |                    |
| Title                     | 1 | Identify the report as a systematic review, meta-analysis, or both.                                                                                                                                                                                                                                         | 1                  |
| <b>ABSTRACT</b>           |   |                                                                                                                                                                                                                                                                                                             |                    |
| Structured summary        | 2 | Provide a structured summary including, as applicable: background; objectives; data sources; study eligibility criteria, participants, and interventions; study appraisal and synthesis methods; results; limitations; conclusions and implications of key findings; systematic review registration number. | 2                  |
| <b>INTRODUCTION</b>       |   |                                                                                                                                                                                                                                                                                                             |                    |
| Rationale                 | 3 | Describe the rationale for the review in the context of what is already known.                                                                                                                                                                                                                              | 3                  |
| Objectives                | 4 | Provide an explicit statement of questions being addressed with reference to participants, interventions, comparisons, outcomes, and study design (PICOS).                                                                                                                                                  | 3                  |
| <b>METHODS</b>            |   |                                                                                                                                                                                                                                                                                                             |                    |
| Protocol and registration | 5 | Indicate if a review protocol exists, if and where it can be accessed (e.g., Web address), and, if available, provide registration information including registration number.                                                                                                                               | No                 |
| Eligibility criteria      | 6 | Specify study characteristics (e.g., PICOS, length of follow-up) and report characteristics (e.g., years considered, language, publication status) used as criteria for eligibility, giving rationale.                                                                                                      | 4                  |
| Information sources       | 7 | Describe all information sources (e.g., databases with dates of coverage, contact with study authors to identify additional studies) in the search and date last searched.                                                                                                                                  | 4                  |
| Search                    | 8 | Present full electronic search strategy for at least one database, including any limits used, such that it could be repeated.                                                                                                                                                                               | 4                  |
| Study selection           | 9 | State the process for selecting studies (i.e., screening, eligibility, included in systematic review, and, if applicable, included in the meta-analysis).                                                                                                                                                   | 4                  |

| Section/topic                      | #  | Checklist item                                                                                                                                                                                                         | Reported on page # |
|------------------------------------|----|------------------------------------------------------------------------------------------------------------------------------------------------------------------------------------------------------------------------|--------------------|
| Data collection process            | 10 | Describe method of data extraction from reports (e.g., piloted forms, independently, in duplicate) and any processes for obtaining and confirming data from investigators.                                             | 4                  |
| Data items                         | 11 | List and define all variables for which data were sought (e.g., PICOS, funding sources) and any assumptions and simplifications made.                                                                                  | 4                  |
| Risk of bias in individual studies | 12 | Describe methods used for assessing risk of bias of individual studies (including specification of whether this was done at the study or outcome level), and how this information is to be used in any data synthesis. | No. Unnecessary    |
| Summary measures                   | 13 | State the principal summary measures (e.g., risk ratio, difference in means).                                                                                                                                          | No. Unnecessary    |
| Synthesis of results               | 14 | Describe the methods of handling data and combining results of studies, if done, including measures of consistency (e.g., $I^2$ ) for each meta-analysis.                                                              | 5                  |
| Risk of bias across studies        | 15 | Specify any assessment of risk of bias that may affect the cumulative evidence (e.g., publication bias, selective reporting within studies).                                                                           | No. Unnecessary    |
| Additional analyses                | 16 | Describe methods of additional analyses (e.g., sensitivity or subgroup analyses, meta-regression), if done, indicating which were pre-specified.                                                                       | No. Unnecessary    |
| <b>RESULTS</b>                     |    |                                                                                                                                                                                                                        |                    |
| Study selection                    | 17 | Give numbers of studies screened, assessed for eligibility, and included in the review, with reasons for exclusions at each stage, ideally with a flow diagram.                                                        | 5                  |
| Study characteristics              | 18 | For each study, present characteristics for which data were extracted (e.g., study size, PICOS, follow-up period) and provide the citations.                                                                           | 5                  |
| Risk of bias within studies        | 19 | Present data on risk of bias of each study and, if available, any outcome-level assessment (see Item 12).                                                                                                              | No. Unnecessary    |
| Results of individual studies      | 20 | For all outcomes considered (benefits or harms), present, for each study: (a) simple summary data for each intervention group and (b) effect estimates and confidence intervals, ideally with a forest plot.           | No. Unnecessary    |
| Synthesis of results               | 21 | Present results of each meta-analysis done, including confidence intervals and                                                                                                                                         | 5, 6, 7            |

| Section/topic               | #  | Checklist item                                                                                                                                                                        | Reported on page # |
|-----------------------------|----|---------------------------------------------------------------------------------------------------------------------------------------------------------------------------------------|--------------------|
|                             |    | measures of consistency.                                                                                                                                                              |                    |
| Risk of bias across studies | 22 | Present results of any assessment of risk of bias across studies (see Item 15).                                                                                                       | No. Unnecessary    |
| Additional analysis         | 23 | Give results of additional analyses, if done (e.g., sensitivity or subgroup analyses, meta-regression [see Item 16]).                                                                 | No. Unnecessary    |
| <b>DISCUSSION</b>           |    |                                                                                                                                                                                       |                    |
| Summary of evidence         | 24 | Summarize the main findings including the strength of evidence for each main outcome; consider their relevance to key groups (e.g., health care providers, users, and policy makers). | 7, 8               |
| Limitations                 | 25 | Discuss limitations at study and outcome level (e.g., risk of bias), and at review level (e.g., incomplete retrieval of identified research, reporting bias).                         | 8                  |
| Conclusions                 | 26 | Provide a general interpretation of the results in the context of other evidence, and implications for future research.                                                               | 8                  |
| <b>FUNDING</b>              |    |                                                                                                                                                                                       |                    |
| Funding                     | 27 | Describe sources of funding for the systematic review and other support (e.g., supply of data); role of funders for the systematic review.                                            | 8                  |
